# Supplementary material
Source: publisher figshare collection journal article supplement (https://gsajournals.figshare.com/ndownloader/files/22406094)
Supplement: Supplementary file 1 [file 22406094]

## Sheet: Sheet1
Accession ID	Sample Name	Taxon	Plant name	Estimated year of origin	Parent1		Parent2		References*	Notes on pedigree
-	BM2000	Pyrus communis	BM2000	NA	NA	NA	NA	NA	NA	NA
PI 256000	CIGC_28.001	xSorbopyrus (intergeneric hybrid)	Pollwiller Pear	NA	NA	NA	NA	NA	NCGR	NA
PI 689459	CIGC_9.001	×Pyronia	Pyronia veitchii	NA	NA	NA	NA	NA	NCGR	NA
PI 542011	CPYR_1.005	Pyrus ussuriensis	P. ussuriensis K-30 (hybrid) - Korea	NA	NA	NA	NA	NA	NA	NA
PI 260195	CPYR_10.004	Pyrus communis	Abbe Fetel (Abate Fetel)	1866/1869	CPYR_59.002	Beurré Clairgeau	NA	NA	Hedrick et al., 1921; Morgan, 2015	confirmed seedling of Beurré Clairgeau
PI 541360	CPYR_100.001	Pyrus communis	Bonne d'Ezee	1788	CPYR_602.004	White Doyenne	CPYR_162.001	Vicar of Winkfield	Hedrick et al., 1921; Morgan, 2015	NEW
PI 541392	CPYR_1249.001	Pyrus communis subsp. pyraster	P. communis ssp. pyraster Olez 4 - Turkey	NA	NA	NA	NA	NA	NA	NA
PI 541382	CPYR_1005.001	Pyrus communis subsp. pyraster	P. communis ssp. pyraster Olez 4 - Turkey	NA	NA	NA	NA	NA	NA	NA
PI 541436	CPYR_1466.001	Pyrus communis subsp. pyraster	P. communis ssp. pyraster Olez 4 - Turkey	NA	NA	NA	NA	NA	NA	NA
PI 541755	CPYR_1007.001	Pyrus hybrid	P. hybrid (salicifolia or elaeagrifolia) - Turkey	NA	NA	NA	NA	NA	NA	NA
PI 436538	CPYR_101.001	Pyrus communis	BP-1 (Bien Donne 1)	NA	NA	NA	NA	NA	NCGR	NA
PI 541978	CPYR_1010.009	Pyrus syriaca	P. syriaca No. 2 - Iran	NA	NA	NA	NA	NA	NA	NA
PI 541979	CPYR_1011.001	Pyrus syriaca	P. syriaca - Iran 1970	NA	NA	NA	NA	NA	NA	NA
PI 541979	CPYR_1011.005	Pyrus syriaca	P. syriaca - Iran	NA	NA	NA	NA	NA	NA	NA
PI 541385	CPYR_1016.001	Pyrus communis	P. communis - Turkey	NA	NA	NA	NA	NA	NA	NA
PI 541927	CPYR_1018.001	Pyrus pyrifolia	P. pyrifolia from A. Donovan house	NA	NA	NA	NA	NA	NCGR	NA
PI 420810	CPYR_102.001	Pyrus communis	BP-2 (Bien Donne 2)	1928	NA	NA	CPYR_1166.001	Kieffer	NCGR	NEW
PI 541113	CPYR_1022.002	Pyrus calleryana f. graciliflora	P. calleryana f. graciliflora Morton Arboretum O.P.	NA	NA	NA	NA	NA	NA	NA
PI 541305	CPYR_103.001	Pyrus communis	Brandy	NA	NA	NA	NA	NA	Morgan, 2015	NA
PI 541722	CPYR_1059.005	Pyrus hybrid	Ayers	introduced 1954	CPYR_239.002	Garber	CPYR_592.001	Vermont Beauty	NCGR	NEW: Ayers believed cross Garber x Anjou, here not confirmed
PI 264192	CPYR_106.002	Pyrus communis	Beurré Dilly	1848	CPYR_249.001	Glou Morceau	CPYR_139.004	Citron de Carmes (Madeleine)	Hedrick et al., 1921; Morgan, 2015	NEW
PI 541455	CPYR_1062.001	Pyrus communis	Beierschmitt	1900	CPYR_38.001_07	Bartlett	CPYR_59.002	Beurré Clairgeau	NCGR	NEW: Known seedling of Bartlett, confirmed. Second parent inferred as Beurré Clairgeau
PI 43183	CPYR_1063.001	Pyrus communis	Belmont	1840	CPYR_1164.001	Winter Nelis	CPYR_38.001_07	Bartlett	Hedrick et al., 1921	NEW
PI 136620	CPYR_1064.001	Pyrus communis	Bergamotte Arsene Sannier	pre 1879	CPYR_38.001_07	Bartlett	CPYR_63.001	Anjou	Hedrick et al., 1921; Morgan, 2015	NEW
PI 279328	CPYR_1066.003	Pyrus communis	Bergamote Tardive de Ganzel	reported 1854	NA	NA	CPYR_238.003	Gansel's Bergamot	Hedrick et al., 1921	NEW
PI 541329	CPYR_1067.002	Pyrus communis	Beurré Auguste	listed 1912	CPYR_38.001_07	Bartlett	CPYR_17.001	Duchesse d'Angouleme	NCGR	NEW
PI 136621	CPYR_1068.002	Pyrus communis	Beurré d'Avril	exhibited 1909	CPYR_249.001	Glou Morceau	CPYR_64.003	Beurré d'Arenberg	Hedrick et al., 1921; Morgan, 2015	NEW
PI 105548	CPYR_1069.002	Pyrus communis	Beurré Flon	first fruited 1852	CPYR_1164.001	Winter Nelis	CPYR_38.001_07	Bartlett	Hedrick et al., 1921	NEW
PI 131489	CPYR_1070.002	Pyrus communis	Beurré Madame Henre Lamy	introduced 1927	CPYR_38.001_07	Bartlett	CPYR_59.002	Beurré Clairgeau	NCGR	NEW: Believed Marguerite Marillat x Beurré Clarigeau. Marguerite Marillat and Beurré Madame Henre Lamy are actaully FS
PI 541330	CPYR_1071.003	Pyrus communis	Blanquet Precoce	NA	NA	NA	NA	NA	Hedrick et al., 1921	NA
PI 104532	CPYR_1073.004	Pyrus communis	Beurré Capiaumont	1787	CPYR_38.001_07	Bartlett	CPYR_1164.001	Winter Nelis	Hedrick et al., 1921; Morgan, 2015	NEW
PI 131123	CPYR_1075.001	Pyrus communis	Charles Escaig	introduced 1933	CPYR_602.004	White Doyenne	CPYR_59.002	Beurré Clairgeau	NCGR	NEW
PI 131992	CPYR_1078.005	Pyrus communis	Citron D'Ete	pre 1895	NA	NA	CPYR_51.002	Bergamotte d'Automne	NCGR	NEW
PI 105193	CPYR_1079.001	Pyrus communis	Clara Frijs (Comtesse Clara Frijs)	described 1858	NA	NA	CPYR_602.004	White Doyenne	NCGR	NEW
PI 541723	CPYR_1083.001	Pyrus hybrid	Douglas	1897	CPYR_1166.001	Kieffer	CPYR_17.001	Duchesse d'Angouleme	Hedrick et al., 1921	confirmed
PI 541337	CPYR_1088.004	Pyrus communis	Early Green Sugar	first reported 1921	CPYR_57.001	Besi de La Motte	CPYR_557.002	Summer Muskatel Birne	Hedrick et al., 1921	NEW
PI 131460	CPYR_1089.002	Pyrus communis	Emile d'Heyst	recorded 1849	NA	NA	CPYR_75.002	Beurré Easter	Morgan, 2015	NEW
PI 541445	CPYR_1090.001	Pyrus communis	Ewart (rec. as 4x - not 4x)	introduced 1928	CPYR_221.001	Farmingdale	CPYR_346.001	Lemon	Morgan, 2015	NEW
PI 541339	CPYR_1096.001	Pyrus communis	HW 600 (Harrow, Ontario)	1963	CPYR_38.001_07	Bartlett	NA	NA	NCGR	confirmed: Bartlett x US 386 (= Mich. 437 x Roi Charles de Wurtemburg)
PI 255605	CPYR_11.004	Pyrus communis	Admiral Gervais	described 1920	NA	NA	CPYR_53.001	Bergamotte Esperen	Morgan, 2015	NEW
PI 131045	CPYR_1102.002	Pyrus communis	Jakobowka Hanowerska	NA	NA	NA	CPYR_2859.001	Zutica	NCGR	NEW: Origin of Zutica and Jakobowka Hanowerska uncertain, not sure which one came first
PI 144035	CPYR_1105.002	Pyrus sp.	Laioyang 50	NA	NA	NA	CPYR_269.003	Hau Kai	NCGR	NEW
PI 127715	CPYR_1106.001	Pyrus hybrid	Krylov	released 1933	NA	NA	CPYR_354.001	Lincoln	NCGR	confirmed
PI 144311	CPYR_1108.001	Pyrus communis	Latvian A	NA	NA	NA	CPYR_83.002	Beurré Inflancka	NCGR	NEW: Beurré Inflancka developed in Poland; Latvian A seedling selection from Latvian seedlot. Not sure which one is parent and which one offspring
PI 127041	CPYR_1110.003	Pyrus communis	Laxton's Satisfaction	1902	CPYR_38.001_07	Bartlett	CPYR_63.001	Anjou	Morgan, 2015	NEW: Believed Bartlett x Beurré Superfin, but here only Bartlett confirmed
PI 541343	CPYR_1111.004	Pyrus communis	Mac	1950	CPYR_252.001	Gorham	CPYR_354.001	Lincoln	Morgan, 2015	NEW: Mac believed Gorham x NJ1, but only Gorham confirmed here
PI 137111	CPYR_1112.002	Pyrus communis	Madame Gillekins	NA	NA	NA	CPYR_335.001	Lajre (3x)	NCGR	NEW
PI 130990	CPYR_1113.001	Pyrus communis	Madame Verte	NA	NA	NA	NA	NA	Hedrick et al., 1921	NA
PI 541724	CPYR_1114.004	Pyrus hybrid	Mandan 58-4	NA	NA	NA	CPYR_2724.001	Comtesse de Paris	NCGR	confirmed Comtesse de Paris parentage: Believed Patten x Parker (= Comtesse de Paris), but Patten is possibly a sampling error
PI 541725	CPYR_1115.001	Pyrus hybrid	Mandan 62-1	NA	NA	NA	CPYR_2724.001	Comtesse de Paris	NCGR	NEW
PI 541446	CPYR_1116.001	Pyrus communis	Marks	1928	CPYR_519.001	Seckel	NA	NA	NCGR	NEW
PI 183962	CPYR_1117.001	Pyrus communis	Marqueza	NA	CPYR_38.001_07	Bartlett	CPYR_1165.001	Bosc - OP-5	NCGR	NEW
PI 97348	CPYR_1119.001	Pyrus pyrifolia	Meigetsu	NA	NA	NA	NA	NA	NCGR	NA
PI 324126	CPYR_112.001	Pyrus communis	Butirra di Roma	first described 1956	CPYR_59.002	Beurré Clairgeau	CPYR_38.001_07	Bartlett	Morgan, 2015	confirmed
PI 541345	CPYR_1120.001	Pyrus communis	Merricourt	1938	CPYR_519.001	Seckel	CPYR_1166.001	Kieffer	Morgan, 2015	NEW: Believed Seckel x Lake Faulkner, but here only Seckel confirmed
PI 541346	CPYR_1122.001	Pyrus communis	Mississippi US 3-10-5	NA	NA	NA	CPYR_1165.001	Bosc - OP-5	NCGR	confirmed: PI 49492 x Bosc, but PI 49492 was not analysed
PI 142234	CPYR_1123.004	Pyrus communis	Mitchell	1869	NA	NA	CPYR_602.004	White Doyenne	Hedrick et al., 1921	confirmed: Buffum = Mitchell
PI 541347	CPYR_1124.003	Pyrus communis	Moe	selected 1930	CPYR_433.002	Orel No. 15	CPYR_1631.001	Clapp Favorite	NCGR	NEW: Believed Zuckerbirne (= Tamiioasa Robert) x Clapp Favorite, but here only Clapp Favorite confirmed
PI 172495	CPYR_1128.003	Pyrus communis	Norhausen Forelle (Nordhäuser Forellenbirne)	reported 1906	CPYR_38.001_07	Bartlett	CPYR_63.001	Anjou	Hedrick et al., 1921; NCGR	NEW
PI 91450	CPYR_1129.002	Pyrus pyrifolia	P. pyrifolia hybrid	NA	NA	NA	NA	NA	NA	NA
PI 143979	CPYR_1130.001	Pyrus hybrid	Olia	1910	CPYR_38.001_07	Bartlett	CPYR_63.001	Anjou	NCGR	NEW: Reported as Pyrus ussuriensis x Finland Early Yellow, cross made in 1910, but here not confirmed; sister seedling of Tioma
PI 130991	CPYR_1133.001	Pyrus communis	Petersbirne	1799	CPYR_38.001_07	Bartlett	CPYR_17.001	Duchesse d'Angouleme	Hedrick et al., 1921; NCGR	NEW
PI 541726	CPYR_1135.001	Pyrus hybrid	Pontotoc	NA	NA	NA	NA	NA	NCGR	NA
PI 131136	CPYR_1141.002	Pyrus communis	Saint Gilles	introduced 1925	CPYR_38.001_07	Bartlett	NA	NA	NCGR	NEW
PI 541348	CPYR_1142.002	Pyrus communis	Sierra	1947	CPYR_38.001_07	Bartlett	CPYR_156.001	Conference	Morgan, 2015	NEW: Believed Bartlett x Marguerite Marillat, but here only Bartlett confirmed
PI 541349	CPYR_1143.001	Pyrus communis	Sirrine	1954	CPYR_38.001_07	Bartlett	CPYR_1165.001	Bosc - OP-5	Morgan, 2015	NEW: Confirmed Bartlett parentage, second parent inferred as Bosc
PI 541727	CPYR_1144.001	Pyrus hybrid	Sodak	introduced in 1945	NA	NA	CPYR_354.001	Lincoln	NCGR	NEW: Sodak believed P. ussuriensis x Marguerite Marillat, here not confirmed. Also, Sodak = Professor Molon, believed Le Lectier x Passe Crassane, here not confirmed
PI 541351	CPYR_1146.001	Pyrus communis	Spartlet	1963	CPYR_38.001_07	Bartlett	CPYR_1631.001	Clapp Favorite	Morgan, 2015	NEW: Bartlett parentage confirmed, second parent inferred as Clapp Favorite
PI 44151	CPYR_1148.001	Pyrus ussuriensis	Suan Li	NA	NA	NA	CPYR_2869.001	Mian Suan (3x?)	NCGR	NEW: Direction of this duo is uncertain, but Ping Guo Li x Suan Li not = Mian Suan
PI 142477	CPYR_1149.002	Pyrus communis	Sudduth (=Burkett)	NA	NA	NA	NA	NA	Hedrick et al., 1921	NA
PI 276764	CPYR_115.001	Pyrus communis	Butirra Precoce Morettini	1930s	CPYR_2286.001	Coscia (Tardive?)	CPYR_38.001_07	Bartlett	Morgan, 2015	confirmed: Coscia Tardive is actually Coscia
PI 541353	CPYR_1150.001	Pyrus communis	Sugar Top	reported 1837	NA	NA	CPYR_602.004	White Doyenne	Hedrick et al., 1921	NEW
PI 541354	CPYR_1151.002	Pyrus communis	Surecrop	selected 1917	CPYR_1164.001	Winter Nelis	CPYR_38.001_07	Bartlett	NCGR	NEW
PI 131889	CPYR_1153.001	Pyrus communis	Tarquin Des Pyrenees	NA	NA	NA	NA	NA	NCGR	NA
PI 189686	CPYR_1155.003	Pyrus communis	Tsarigradka	NA	CPYR_38.001_07	Bartlett	CPYR_63.001	Anjou	NCGR	NEW
PI 129642	CPYR_1156.002	Pyrus communis	Tyford Monarch	NA	NA	NA	CPYR_17.001	Duchesse d'Angouleme	NCGR	NEW
PI 542007	CPYR_1157.002	Pyrus ussuriensis	Tzu Ma Li	NA	NA	NA	NA	NA	NCGR	NA
PI 189695	CPYR_1158.002	Pyrus communis	Ulitchka	NA	NA	NA	NA	NA	NCGR	NA
PI 541356	CPYR_1160.001	Pyrus communis	Willard	1921	CPYR_38.001_07	Bartlett	CPYR_179.002	Dorset	NCGR	confirmed
PI 129643	CPYR_1162.003	Pyrus communis	Winter Cole	1800	CPYR_1164.001	Winter Nelis	CPYR_382.002	Marie Louise	NCGR	NEW: Known seedling of Winter Nelis
PI 541285	CPYR_1164.001	Pyrus communis	Winter Nelis	early 1800s	NA	NA	CPYR_57.001	Besi de La Motte	Hedrick et al., 1921; Morgan, 2015	NEW
PI 541387	CPYR_1165.001	Pyrus communis	Bosc - OP-5	NA	NA	NA	NA	NA	Hedrick et al., 1921; Morgan, 2015	NA
PI 541714	CPYR_1166.001	Pyrus hybrid	Kieffer	first fruited 1863	NA	NA	CPYR_38.001_07	Bartlett	Hedrick et al., 1921; Morgan, 2015	confirmed
PI 541299	CPYR_1167.001	Pyrus communis	Magness	introduced 1960	CPYR_3015.001	Giant Seckel	CPYR_148.001	Doyenne du Comice	Morgan, 2015	NEW: It was believed Seckel x Comice, here not confirmed
PI 541388	CPYR_1168.001	Pyrus communis	El Dorado	discovered in 1931	CPYR_38.001_07	Bartlett	CPYR_1164.001	Winter Nelis	Morgan, 2015	NEW: Found in between Bartlett and Winter Nelis orchards
PI 541012	CPYR_1170.002	Pyrus calleryana	OPR-157 P. calleryana	NA	NA	NA	NA	NA	NCGR	NA
PI 541085	CPYR_1171.003	Pyrus calleryana	OPR-135 P. calleryana	NA	NA	NA	NA	NA	NCGR	NA
PI 541904	CPYR_1173.002	Pyrus pyrifolia	Seuri Li	NA	CPYR_1678.001	Ya Li	CPYR_1119.001	Meigetsu	NCGR	NEW: Ya Li old cultivar from Northeast China; Meigetsu, uncertain; Seuri Li likely entered the U.S. in 1965 from Korea
PI 542023	CPYR_1177.001	Pyrus ×bretschneideri	Tsu Li	NA	NA	NA	NA	NA	NCGR	NA
PI 542024	CPYR_1184.001	Pyrus ussuriensis	Tang Li	NA	NA	NA	NA	NA	NCGR	NA
PI 300691	CPYR_1187.001	Pyrus communis	Beurré Hardy	1820	NA	NA	CPYR_78.002	Beurré Gris	Hedrick et al., 1921; Morgan, 2015	NEW: Beurré Hardy raised ca. 1820 in France; Beurré Gris (= Beurré Brown) origin confused, might be as early as 1628 or 1867, France
PI 282935	CPYR_119.001	Pyrus communis	Butirra Rosata Morettini	selected 1940	CPYR_2286.001	Coscia (Tardive?)	CPYR_59.002	Beurré Clairgeau	Morgan, 2015	confirmed: Coscia Tardive is actually Coscia.
PI 325930	CPYR_1190.001	Pyrus dimorphophylla	P. dimorphophylla Vo-29	NA	NA	NA	CPYR_1390.001	P. dimorphophylla - Japan	NCGR	NEW
PI 325930	CPYR_1389.001	Pyrus dimorphophylla	P. dimorphophylla Vo-29	NA	NA	NA	CPYR_1390.001	P. dimorphophylla - Japan	NCGR	NEW
PI 324172	CPYR_1191.001	Pyrus communis subsp. caucasica	P. communis ssp. caucasica - Yalta	NA	NA	NA	NA	NA	NA	NA
PI 440629	CPYR_717.001	Pyrus communis subsp. caucasica	P. communis ssp. caucasica - Stavropol	seed collected 1967	NA	NA	NA	NA	NA	NA
PI 324029	CPYR_2038.001	Pyrus communis subsp. caucasica	P. communis ssp. caucasica - Stavropol	seed collected 1967	NA	NA	NA	NA	NA	NA
PI 324031	CPYR_2040.001	Pyrus communis subsp. caucasica	P. communis ssp. caucasica - Stavropol	seed collected 1967	NA	NA	NA	NA	NA	NA
PI 337438	CPYR_688.001	Pyrus communis subsp. caucasica	P. communis ssp. caucasica - Stavropol	seed collected 1967	NA	NA	NA	NA	NA	NA
PI 337441	CPYR_690.001	Pyrus communis subsp. caucasica	P. communis ssp. caucasica - Stavropol	seed collected 1967	NA	NA	NA	NA	NA	NA
PI 440629	CPYR_719.001	Pyrus communis subsp. caucasica	P. communis ssp. caucasica - Stavropol	seed collected 1967	NA	NA	NA	NA	NA	NA
PI 440629	CPYR_720.001	Pyrus communis subsp. caucasica	P. communis ssp. caucasica - Stavropol	seed collected 1967	NA	NA	NA	NA	NA	NA
PI 337439	CPYR_689.001	Pyrus communis subsp. caucasica	P. communis ssp. caucasica - Stavropol	seed collected 1967	NA	NA	NA	NA	NA	NA
PI 324028	CPYR_1192.001	Pyrus communis subsp. caucasica	P. communis ssp. caucasica - Stavropol	seed collected 1967	CPYR_687.001	P. communis ssp. caucasica - Stavropol	NA	NA	NCGR	NEW
PI 337437	CPYR_687.001	Pyrus communis subsp. caucasica	P. communis ssp. caucasica - Stavropol	seed collected 1967	NA	NA	NA	NA	NA	NA
PI 324032	CPYR_1193.001	Pyrus communis subsp. caucasica	P. communis ssp. caucasica - Stavropol	seed collected 1967	NA	NA	NA	NA	NA	NA
PI 440629	CPYR_718.001	Pyrus communis subsp. caucasica	P. communis ssp. caucasica - Stavropol	seed collected 1967	NA	NA	NA	NA	NA	NA
PI 324027	CPYR_2037.001	Pyrus communis subsp. caucasica	P. communis ssp. caucasica - Stavropol	seed collected 1967	NA	NA	NA	NA	NA	NA
PI 440629	CPYR_721.001	Pyrus communis subsp. caucasica	P. communis ssp. caucasica - Stavropol	seed collected 1967	NA	NA	NA	NA	NA	NA
PI 324037	CPYR_1194.001	Pyrus communis subsp. caucasica	P. communis ssp. caucasica - Caucasus Mts.	NA	NA	NA	NA	NA	NA	NA
PI 324042	CPYR_1195.001	Pyrus communis subsp. caucasica	P. communis ssp. caucasica - Caucasus Mts.	NA	NA	NA	NA	NA	NA	NA
PI 541864	CPYR_1196.001	Pyrus nivalis	P. nivalis	NA	NA	NA	NA	NA	NA	NA
PI 541862	CPYR_864.001	Pyrus nivalis	P. nivalis	NA	NA	NA	NA	NA	NA	NA
PI 312145	CPYR_860.003	Pyrus nivalis	P. nivalis	NA	NA	NA	NA	NA	NA	NA
PI 541861	CPYR_863.001	Pyrus nivalis	P. nivalis	NA	NA	NA	NA	NA	NA	NA
PI 305300	CPYR_1198.001	Pyrus ussuriensis	P. ussuriensis - China (from Vavilov)	NA	NA	NA	NA	NA	NA	NA
PI 305300	CPYR_1200.001	Pyrus ussuriensis	P. ussuriensis - China (from Vavilov)	NA	NA	NA	NA	NA	NA	NA
PI 305300	CPYR_1197.001	Pyrus ussuriensis	P. ussuriensis - China (from Vavilov)	NA	NA	NA	NA	NA	NA	NA
PI 324124	CPYR_12.002	Pyrus communis	Akca	NA	NA	NA	NA	NA	NCGR	NA
PI 542014	CPYR_1201.001	Pyrus ussuriensis	P. ussuriensis No. 1 - Korea	NA	NA	NA	NA	NA	NA	NA
PI 542014	CPYR_1202.001	Pyrus ussuriensis	P. ussuriensis No. 2 - Korea	NA	NA	NA	NA	NA	NA	NA
PI 542014	CPYR_1203.001	Pyrus ussuriensis	P. ussuriensis No. 3 - Korea	NA	NA	NA	NA	NA	NA	NA
PI 542014	CPYR_1204.001	Pyrus ussuriensis	P. ussuriensis No. 4 - Korea	NA	NA	NA	NA	NA	NA	NA
PI 541670	CPYR_1205.001	Pyrus glabra	P. glabra	NA	NA	NA	NA	NA	NA	NA
PI 541670	CPYR_1208.001	Pyrus glabra	P. glabra	NA	NA	NA	NA	NA	NA	NA
PI 541670	CPYR_1206.001	Pyrus glabra	P. glabra	NA	NA	NA	NA	NA	NA	NA
PI 541670	CPYR_1207.001	Pyrus glabra	P. glabra	NA	NA	NA	NA	NA	NA	NA
PI 541156	CPYR_121.001	Pyrus communis	Butt	NA	NA	NA	NA	NA	Hedrick et al., 1921; Morgan, 2015	NA
PI 541601	CPYR_1214.001	Pyrus dimorphophylla	P. dimorphophylla	NA	NA	NA	NA	NA	NA	NA
PI 540976	CPYR_1309.004	Pyrus betulifolia	P. betulifolia	NA	NA	NA	NA	NA	NA	NA
PI 540944	CPYR_658.001	Pyrus betulifolia	P. betulifolia	NA	CPYR_656.001	OPR-114 P. betulifolia No. 5	CPYR_653.001	OPR-110 P. betulifolia No. 1	NCGR	NEW
PI 540971	CPYR_1261.001	Pyrus betulifolia	P. betulifolia	NA	NA	NA	NA	NA	NA	NA
PI 540990	CPYR_1442.001	Pyrus betulifolia	P. betulifolia	NA	CPYR_1263.001	P. betulifolia OSU-3	CPYR_656.001	OPR-114 P. betulifolia No. 5	NCGR	NEW
PI 540989	CPYR_1441.001	Pyrus betulifolia	P. betulifolia	NA	CPYR_1263.001	P. betulifolia OSU-3	CPYR_656.001	OPR-114 P. betulifolia No. 5	NCGR	NEW
PI 540979	CPYR_1312.003	Pyrus betulifolia	P. betulifolia	NA	NA	NA	NA	NA	NA	NA
PI 540965	CPYR_1216.001	Pyrus betulifolia	P. betulifolia	NA	CPYR_1263.001	P. betulifolia OSU-3	CPYR_656.001	OPR-114 P. betulifolia No. 5	NCGR	NEW
PI 540943	CPYR_657.001	Pyrus betulifolia	P. betulifolia	NA	CPYR_656.001	OPR-114 P. betulifolia No. 5	CPYR_653.001	OPR-110 P. betulifolia No. 1	NCGR	NEW
PI 540948	CPYR_651.001	Pyrus betulifolia	P. betulifolia	NA	NA	NA	NA	NA	NA	NA
PI 540991	CPYR_1443.001	Pyrus betulifolia	P. betulifolia	NA	CPYR_1263.001	P. betulifolia OSU-3	CPYR_656.001	OPR-114 P. betulifolia No. 5	NCGR	NEW
PI 540972	CPYR_1262.001	Pyrus betulifolia	P. betulifolia	NA	NA	NA	NA	NA	NA	NA
PI 540977	CPYR_1310.002	Pyrus betulifolia	P. betulifolia	NA	NA	NA	NA	NA	NA	NA
PI 540974	CPYR_1307.002	Pyrus betulifolia	P. betulifolia	NA	NA	NA	NA	NA	NA	NA
PI 617510	CPYR_921.001	Pyrus betulifolia	P. betulifolia	NA	NA	NA	NA	NA	NA	NA
PI 540975	CPYR_1308.002	Pyrus betulifolia	P. betulifolia	NA	NA	NA	NA	NA	NA	NA
PI 540978	CPYR_1311.001	Pyrus betulifolia	P. betulifolia	NA	NA	NA	NA	NA	NA	NA
PI 540947	CPYR_647.002	Pyrus betulifolia	P. betulifolia	NA	NA	NA	NA	NA	NA	NA
PI 541691	CPYR_1217.002	Pyrus hondoensis	P. hondoensis 23A x P. hondoensis OP seedling	NA	NA	NA	NA	NA	NA	NA
PI 617513	CPYR_1218.001	Pyrus calleryana	P. calleryana PC-5 (non-typical)	NA	CPYR_673.001	P. calleryana PC-5	CPYR_674.001	P. calleryana PC-6	NCGR	NEW
PI 617515	CPYR_1220.001	Pyrus calleryana	P. calleryana PC-7 (hybrid)	NA	CPYR_673.001	P. calleryana PC-5	CPYR_674.001	P. calleryana PC-6	NCGR	NEW
PI 541440	CPYR_699.001	Pyrus communis	P. communis	NA	NA	NA	NA	NA	NA	NA
PI 541389	CPYR_1221.001	Pyrus communis	P. communis	NA	CPYR_38.001_07	Bartlett	CPYR_63.001	Anjou	NCGR	NEW
PI 541760	CPYR_1226.001	Pyrus hybrid	Chieh Li x Japanese Golden Russet (Decline Resist.)	NA	CPYR_2338.001	Chien Li	CPYR_620.001	Yaguang Li [Ya Kuang Li]	NCGR	NEW: Believed offsrping of Japanese Golden Russet, here not confirmed
PI 541761	CPYR_1227.001	Pyrus hybrid	Chieh Li x Japanese Golden Russet (Decline Susc.)	NA	CPYR_2338.001	Chien Li	CPYR_303.003	Japanese Golden Russet	NCGR	confirmed
PI 541762	CPYR_1228.001	Pyrus pyrifolia	Japanese Golden Russet x Mikado (Decline Resist.)	NA	CPYR_270.001	Hawaii	CPYR_303.003	Japanese Golden Russet	NCGR	NEW: parentage from Japanes Golden Russet confirmed, second parent inferred as Hawaii
PI 541763	CPYR_1229.001	Pyrus pyrifolia	Japanese Golden Russet x Mikado (Decline Susc.)	NA	CPYR_270.001	Hawaii	CPYR_303.003	Japanese Golden Russet	NCGR	NEW: parentage from Japanes Golden Russet confirmed, second parent inferred as Hawaii
PI 541157	CPYR_123.001	Pyrus communis	California	1959	CPYR_38.001_07	Bartlett	CPYR_148.001	Doyenne du Comice	NCGR	confirmed: Max Red Bartlett x Comice
PI 541766	CPYR_1232.002	Pyrus pyrifolia	Hawaii x Japanese Golden Russet	NA	CPYR_270.001	Hawaii	CPYR_303.003	Japanese Golden Russet	NCGR	confirmed
PI 541765	CPYR_1231.001	Pyrus pyrifolia	Hawaii x Japanese Golden Russet	NA	CPYR_270.001	Hawaii	CPYR_303.003	Japanese Golden Russet	NCGR	confirmed
PI 541767	CPYR_1233.001	Pyrus hybrid	Nijisseiki x Old Home	NA	NA	NA	NA	NA	NCGR	NA
PI 541680	CPYR_1236.001	Pyrus hondoensis	P. hondoensis 117-28B x P. hondoensis OP seedling	NA	NA	NA	CPYR_1321.001	OHxF 29	NCGR	NEW
PI 541680	CPYR_1236.003	Pyrus hondoensis	P. hondoensis 117-28B x P. hondoensis OP seedling	NA	NA	NA	NA	NA	NA	NA
PI 540966	CPYR_1237.001	Pyrus betulifolia	P. betulifolia OSU-1	NA	CPYR_1263.001	P. betulifolia OSU-3	CPYR_653.001	OPR-110 P. betulifolia No. 1	NCGR	NEW
PI 540967	CPYR_1238.001	Pyrus betulifolia	P. betulifolia OSU-1	NA	CPYR_656.001	OPR-114 P. betulifolia No. 5	CPYR_653.001	OPR-110 P. betulifolia No. 1	NCGR	NEW
PI 540992	CPYR_1458.001	Pyrus betulifolia	P. betulifolia OSU-1	NA	CPYR_656.001	OPR-114 P. betulifolia No. 5	CPYR_653.001	OPR-110 P. betulifolia No. 1	NCGR	NEW
PI 541768	CPYR_1239.001	Pyrus hybrid	P. pashia x P. calleryana	NA	NA	NA	NA	NA	NA	NA
PI 541797	CPYR_1474.001	Pyrus hybrid	P. pashia x P. calleryana	NA	NA	NA	CPYR_1239.001	P. pashia x P. calleryana	NCGR	NEW: Not sure about the direction of this duo
PI 541769	CPYR_1241.001	Pyrus hybrid	P. pashia x P. betulifolia	NA	NA	NA	NA	NA	NA	NA
PI 541643	CPYR_1243.001	Pyrus fauriei	P. fauriei MA x P. fauriei W-6	NA	NA	NA	CPYR_1281.001	P. fauriei - Korea (Morton Arboretum)	NCGR	NEW
PI 541642	CPYR_1242.001	Pyrus fauriei	P. fauriei MA x P. fauriei W-6	NA	NA	NA	CPYR_1281.001	P. fauriei - Korea (Morton Arboretum)	NCGR	NEW
PI 540968	CPYR_1244.001	Pyrus betulifolia	P. betulifolia OSU-3 seedling A	NA	CPYR_1263.001	P. betulifolia OSU-3	CPYR_656.001	OPR-114 P. betulifolia No. 5	NCGR	NEW
PI 541021	CPYR_663.001	Pyrus calleryana	P. calleryana	NA	NA	NA	NA	NA	NA	NA
PI 541071	CPYR_1435.001	Pyrus calleryana	P. calleryana	NA	NA	NA	CPYR_1269.002	P. calleryana OSU-8	NCGR	NEW
PI 541064	CPYR_1303.001	Pyrus calleryana	P. calleryana	NA	NA	NA	NA	NA	NA	NA
PI 541077	CPYR_1452.001	Pyrus calleryana	P. calleryana	NA	CPYR_673.001	P. calleryana PC-5	CPYR_674.001	P. calleryana PC-6	NCGR	NEW
PI 541078	CPYR_1460.001	Pyrus calleryana	P. calleryana	NA	NA	NA	NA	NA	NA	NA
PI 541009	CPYR_666.001	Pyrus calleryana	P. calleryana	NA	NA	NA	NA	NA	NA	NA
PI 420809	CPYR_661.001	Pyrus calleryana	P. calleryana	NA	NA	NA	NA	NA	NA	NA
PI 541026	CPYR_668.001	Pyrus calleryana	P. calleryana	NA	NA	NA	NA	NA	NA	NA
PI 541051	CPYR_1253.001	Pyrus calleryana	P. calleryana	NA	NA	NA	NA	NA	NA	NA
PI 541065	CPYR_1304.001	Pyrus calleryana	P. calleryana	NA	NA	NA	NA	NA	NA	NA
PI 541010	CPYR_669.001	Pyrus calleryana	P. calleryana	NA	NA	NA	NA	NA	NA	NA
PI 541011	CPYR_670.001	Pyrus calleryana	P. calleryana	NA	NA	NA	NA	NA	NA	NA
PI 541063	CPYR_1302.001	Pyrus calleryana	P. calleryana	NA	NA	NA	NA	NA	NA	NA
PI 541050	CPYR_1245.001	Pyrus calleryana	P. calleryana	NA	NA	NA	NA	NA	NA	NA
PI 541052	CPYR_1254.001	Pyrus calleryana	P. calleryana	NA	NA	NA	NA	NA	NA	NA
PI 617518	CPYR_1334.001	Pyrus calleryana	P. calleryana	NA	NA	NA	CPYR_2577.001	Bradford (P. calleryana)	NCGR	NEW: Not sure about the direction of this duo
PI 541391	CPYR_1248.001	Pyrus communis subsp. pyraster	P. communis ssp. pyraster Olez 5 - Turkey	NA	NA	NA	NA	NA	NA	NA
PI 541393	CPYR_1250.001	Pyrus communis subsp. pyraster	P. communis ssp. pyraster Olez 5 - Turkey	NA	NA	NA	NA	NA	NA	NA
PI 541291	CPYR_693.001	Pyrus communis subsp. pyraster	P. communis ssp. pyraster Olez 5 - Turkey	NA	NA	NA	NA	NA	NA	NA
PI 541435	CPYR_1465.001	Pyrus communis subsp. pyraster	P. communis ssp. pyraster Olez 5 - Turkey	NA	NA	NA	NA	NA	NA	NA
PI 541394	CPYR_1251.002	Pyrus communis	P. communis - France	NA	NA	NA	NA	NA	NA	NA
PI 541395	CPYR_1252.001	Pyrus communis subsp. pyraster	P. communis ssp. pyraster Olez 3 - Turkey	NA	NA	NA	NA	NA	NA	NA
PI 617521	CPYR_1467.001	Pyrus communis subsp. pyraster	P. communis ssp. pyraster Olez 3 - Turkey	NA	NA	NA	NA	NA	NA	NA
PI 542015	CPYR_1260.001	Pyrus ussuriensis	P. ussuriensis MA 1919-23	NA	NA	NA	NA	NA	NA	NA
PI 540973	CPYR_1263.001	Pyrus betulifolia	P. betulifolia OSU-3	NA	NA	NA	NA	NA	NA	NA
PI 541053	CPYR_1264.003	Pyrus calleryana	P. calleryana OSU-2	NA	NA	NA	NA	NA	NA	NA
PI 541054	CPYR_1265.003	Pyrus calleryana	P. calleryana OSU-3	collected 1917	NA	NA	CPYR_1268.002	P. calleryana OSU-7	NCGR	NEW
PI 541055	CPYR_1266.002	Pyrus calleryana	P. calleryana OSU-5	NA	NA	NA	NA	NA	NA	NA
PI 541056	CPYR_1267.001	Pyrus calleryana	P. calleryana OSU-6	collected 1917	NA	NA	CPYR_1265.003	P. calleryana OSU-3	NCGR	NEW
PI 541057	CPYR_1268.002	Pyrus calleryana	P. calleryana OSU-7	collected 1917	CPYR_1264.003	P. calleryana OSU-2	CPYR_1435.001	P. calleryana	NCGR	NEW
PI 541058	CPYR_1269.002	Pyrus calleryana	P. calleryana OSU-8	collected 1917	CPYR_1601.001	P. calleryana OSU-10	CPYR_1264.003	P. calleryana OSU-2	NCGR	NEW
PI 541158	CPYR_127.001	Pyrus communis	Canal Pear	1955	CPYR_148.001	Doyenne du Comice	CPYR_38.001_07	Bartlett	Morgan, 2015	NEW: same as Canal Red, believed Forelle x Max Red Barltett, but here only Bartlett confirmed
PI 541059	CPYR_1270.001	Pyrus calleryana	P. calleryana OSU-9	collected 1917	CPYR_1601.001	P. calleryana OSU-10	CPYR_1264.003	P. calleryana OSU-2	NCGR	NEW
PI 541770	CPYR_1273.001	Pyrus hybrid	P. betulifolia x P. calleryana	NA	NA	NA	NA	NA	NA	NA
PI 541771	CPYR_1274.001	Pyrus hybrid	P. betulifolia-2 x P. calleryana-2	NA	NA	NA	NA	NA	NA	NA
PI 260200	CPYR_1275.001	Pyrus hybrid	Cherry Pear	NA	NA	NA	NA	NA	NCGR	NA
PI 541959	CPYR_1276.001	Pyrus calleryana	P. calleryana MA182-53	NA	NA	NA	NA	NA	NA	NA
PI 541626	CPYR_1277.001	Pyrus elaeagrifolia	P. elaeagrifolia WB-4 - Turkey	NA	NA	NA	NA	NA	NA	NA
PI 541615	CPYR_770.001	Pyrus elaeagrifolia	P. elaeagrifolia WB-4 - Turkey	NA	NA	NA	NA	NA	NA	NA
PI 541616	CPYR_1278.001	Pyrus elaeagrifolia	P. elaeagrifolia 'Turkish Mist'	NA	NA	NA	NA	NA	NA	NA
PI 541159	CPYR_128.002	Pyrus hybrid	Canner (Waite?)	NA	CPYR_1166.001	Kieffer	CPYR_17.001	Duchesse d'Angouleme	NCGR	NEW: Canner known seedling of Kieffer. Second parent identified as Duchesse d'Angouleme. Canner is not same as Waite, they seem HS
PI 541651	CPYR_1472.001	Pyrus fauriei	P. fauriei	NA	NA	NA	NA	NA	NA	NA
PI 541644	CPYR_1280.003	Pyrus fauriei	P. fauriei	NA	NA	NA	NA	NA	NA	NA
PI 541646	CPYR_1283.001	Pyrus fauriei	P. fauriei	NA	NA	NA	NA	NA	NA	NA
PI 617516	CPYR_1281.001	Pyrus fauriei	P. fauriei - Korea (Morton Arboretum)	pre 1931	NA	NA	CPYR_776.001	P. fauriei MSU5768	NCGR	NEW: Not sure about the direction of this duo
PI 542016	CPYR_1286.001	Pyrus ussuriensis	P. ussuriensis CJW	NA	NA	NA	NA	NA	NA	NA
PI 541627	CPYR_1287.001	Pyrus elaeagrifolia	P. elaeagrifolia Olez 2 - Turkey	NA	NA	NA	NA	NA	NA	NA
PI 541613	CPYR_768.001	Pyrus elaeagrifolia	P. elaeagrifolia Olez 2 - Turkey	NA	NA	NA	NA	NA	NA	NA
PI 541614	CPYR_769.001	Pyrus elaeagrifolia	P. elaeagrifolia Olez 2 - Turkey	NA	NA	NA	NA	NA	NA	NA
PI 132094	CPYR_1288.001	Pyrus communis subsp. pyraster	P. communis ssp. pyraster - Iran	NA	NA	NA	NA	NA	NA	NA
PI 541160	CPYR_129.002	Pyrus hybrid	Cayuga	1906	CPYR_57.001	Besi de La Motte	NA	NA	Morgan, 2015	NEW: Believed seedling of Seckel, here not confirmed
PI 541922	CPYR_1290.001	Pyrus pyrifolia	P. pyrifolia Donovan	NA	NA	NA	CPYR_1018.001	P. pyrifolia from A. Donovan house	NCGR	NEW: Collected from same property, not sure which one is parent and which one offspring
PI 541923	CPYR_1297.001	Pyrus pyrifolia	P. pyrifolia Donovan	NA	NA	NA	NA	NA	NA	NA
PI 542017	CPYR_1293.002	Pyrus ussuriensis	P. ussuriensis 2497-22 - China	NA	NA	NA	NA	NA	NA	NA
PI 541603	CPYR_1296.001	Pyrus dimorphophylla	P. dimorphophylla 408	NA	NA	NA	NA	NA	NA	NA
PI 541610	CPYR_757.001	Pyrus dimorphophylla	P. dimorphophylla 408	NA	NA	NA	NA	NA	NA	NA
PI 541924	CPYR_1298.001	Pyrus pyrifolia	P. pyrifolia Kor 5	NA	NA	NA	NA	NA	NA	NA
PI 541114	CPYR_13.003	Pyrus communis	Allexandrine Douillard	first fruited 1849	CPYR_249.001	Glou Morceau	CPYR_17.001	Duchesse d'Angouleme	Hedrick et al., 1921; Morgan, 2015	NEW
PI 312495	CPYR_130.003	Pyrus communis	Cebulka	NA	NA	NA	NA	NA	NCGR	NA
PI 143978	CPYR_1300.001	Pyrus ussuriensis	P. ussuriensis - Manchuria	NA	NA	NA	NA	NA	NA	NA
PI 541062	CPYR_1301.001	Pyrus calleryana	P. calleryana SN	NA	NA	NA	NA	NA	NA	NA
PI 541775	CPYR_1305.001	Pyrus hybrid	P. betulifolia x P. pyrifolia	NA	NA	NA	NA	NA	NA	NA
PI 541798	CPYR_1478.001	Pyrus hybrid	P. betulifolia x P. pyrifolia	NA	NA	NA	NA	NA	NA	NA
PI 541161	CPYR_131.001	Pyrus communis	Chapin	1908	CPYR_519.001	Seckel	NA	NA	Morgan, 2015	confirmed
PI 541604	CPYR_1313.001	Pyrus dimorphophylla	P. dimorphophylla x self	NA	NA	NA	CPYR_1494.001	P. betulifolia 2 x P. call. 2	NCGR	NEW
PI 541066	CPYR_1314.002	Pyrus calleryana	OPR-125 P. calleryana	NA	NA	NA	NA	NA	NCGR	NA
PI 541776	CPYR_1315.001	Pyrus hybrid	P. ussuriensis x P. calleryana	NA	NA	NA	NA	NA	NA	NA
PI 541799	CPYR_1479.001	Pyrus hybrid	P. ussuriensis x P. calleryana	NA	NA	NA	CPYR_1315.001	P. ussuriensis x P. calleryana	NCGR	NEW: Not sure about the direction of this duo
PI 542019	CPYR_1318.001	Pyrus ussuriensis	Harbin (P. ussuriensis)	NA	NA	NA	NA	NA	NCGR	NA
PI 541396	CPYR_1319.001	Pyrus communis	OHxF 257	1952	CPYR_431.001	Old Home	CPYR_38.001_07	Bartlett	Postman et al., 2013	confirmed
PI 541162	CPYR_132.002	Pyrus communis	Chasseurs	NA	NA	NA	NA	NA	Hedrick et al., 1921	NA
PI 541397	CPYR_1320.001	Pyrus communis	OHxF 18	1952	CPYR_431.001	Old Home	CPYR_38.001_07	Bartlett	Postman et al., 2013	confirmed
PI 541398	CPYR_1321.001	Pyrus communis	OHxF 29	1952	CPYR_431.001	Old Home	CPYR_38.001_07	Bartlett	Postman et al., 2013	confirmed
PI 541399	CPYR_1322.001	Pyrus communis	OHxF 7	1952	CPYR_431.001	Old Home	CPYR_38.001_07	Bartlett	Postman et al., 2013	confirmed
PI 541400	CPYR_1323.001	Pyrus communis	OHxF 267	1952	CPYR_431.001	Old Home	CPYR_38.001_07	Bartlett	Postman et al., 2013	confirmed
PI 541402	CPYR_1325.001	Pyrus communis	OHxF 40	1952	CPYR_431.001	Old Home	CPYR_38.001_07	Bartlett	Postman et al., 2013	confirmed
PI 541403	CPYR_1326.001	Pyrus communis	OHxF 340	1952	CPYR_431.001	Old Home	CPYR_38.001_07	Bartlett	Postman et al., 2013	confirmed
PI 541404	CPYR_1327.001	Pyrus communis	OHxF 132	1952	CPYR_431.001	Old Home	CPYR_38.001_07	Bartlett	Postman et al., 2013	confirmed
PI 541406	CPYR_1330.002	Pyrus communis	OHxF 130	1952	CPYR_431.001	Old Home	CPYR_38.001_07	Bartlett	Postman et al., 2013	confirmed
PI 541779	CPYR_1331.002	Pyrus hybrid	P. dimorphophylla x P. fauriei	NA	NA	NA	NA	NA	NA	NA
PI 541734	CPYR_762.001	Pyrus hybrid	P. dimorphophylla x P. fauriei	NA	NA	NA	CPYR_1494.001	P. betulifolia 2 x P. call. 2	NCGR	NEW
PI 542020	CPYR_1332.001	Pyrus ussuriensis	P. ussuriensis	NA	NA	NA	NA	NA	NA	NA
PI 541409	CPYR_1337.001	Pyrus communis	OHxF 4	1952	CPYR_431.001	Old Home	CPYR_38.001_07	Bartlett	Postman et al., 2013	confirmed
PI 541410	CPYR_1338.001	Pyrus communis	OHxF 5	1952	CPYR_431.001	Old Home	CPYR_38.001_07	Bartlett	Postman et al., 2013	confirmed
PI 541411	CPYR_1339.001	Pyrus communis	OHxF 23	1952	CPYR_431.001	Old Home	CPYR_38.001_07	Bartlett	Postman et al., 2013	confirmed
PI 541987	CPYR_134.001	Pyrus ussuriensis	Chien Pa Li (=Pa Li)	NA	NA	NA	NA	NA	NCGR	NA
PI 541412	CPYR_1340.001	Pyrus communis	OHxF 34	1952	CPYR_431.001	Old Home	CPYR_38.001_07	Bartlett	Postman et al., 2013	confirmed
PI 541413	CPYR_1342.001	Pyrus communis	OHxF 2	1952	CPYR_431.001	Old Home	CPYR_38.001_07	Bartlett	Postman et al., 2013	confirmed
PI 665738	CPYR_1343.001	Pyrus communis	OHxF 69	1952	CPYR_431.001	Old Home	CPYR_38.001_07	Bartlett	Postman et al., 2013	confirmed
PI 541414	CPYR_1344.001	Pyrus communis	OHxF 512	1952	CPYR_431.001	Old Home	CPYR_63.001	Anjou	Postman et al., 2013	NEW: As OHxF it was bealieaved to be Old Home x Bartlett
PI 541415	CPYR_1345.001	Pyrus communis	OHxF 87	1952	CPYR_431.001	Old Home	CPYR_38.001_07	Bartlett	Postman et al., 2013	confirmed
PI 541780	CPYR_1348.001	Pyrus hybrid	P-79 x P. betulifolia	NA	NA	NA	NA	NA	NCGR	NA
PI 541416	CPYR_1350.001	Pyrus communis	OHxF 101	1952	CPYR_431.001	Old Home	CPYR_38.001_07	Bartlett	Postman et al., 2013	confirmed
PI 541417	CPYR_1351.001	Pyrus communis	OHxF 109	1952	CPYR_431.001	Old Home	CPYR_38.001_07	Bartlett	Postman et al., 2013	confirmed
PI 541783	CPYR_1353.001	Pyrus hybrid	P. betulifolia x P. calleryana-5	NA	NA	NA	NA	NA	NA	NA
PI 541418	CPYR_1354.001	Pyrus communis	OHxF 112	1952	CPYR_431.001	Old Home	CPYR_38.001_07	Bartlett	Postman et al., 2013	confirmed
PI 541784	CPYR_1355.001	Pyrus hybrid	P. betulifolia-2 x P-12	NA	NA	NA	NA	NA	NA	NA
PI 540994	CPYR_1485.001	Pyrus betulifolia	P. betulifolia-2 x P. betulifolia-1	NA	CPYR_656.001	OPR-114 P. betulifolia No. 5	CPYR_653.001	OPR-110 P. betulifolia No. 1	NCGR	NEW
PI 540980	CPYR_1356.001	Pyrus betulifolia	P. betulifolia-2 x P. betulifolia-1	NA	CPYR_656.001	OPR-114 P. betulifolia No. 5	CPYR_653.001	OPR-110 P. betulifolia No. 1	NCGR	NEW
PI 541785	CPYR_1357.001	Pyrus hybrid	P. betulifolia-2 x Farmingdale	NA	NA	NA	NA	NA	NA	NA
PI 541786	CPYR_1358.001	Pyrus hybrid	Burkett x P. betulifolia	NA	NA	NA	NA	NA	NCGR	NA
PI 541419	CPYR_1359.001	Pyrus communis	OHxF 198	1952	CPYR_431.001	Old Home	CPYR_38.001_07	Bartlett	Postman et al., 2013	confirmed
PI 97347	CPYR_136.004	Pyrus pyrifolia	Chojuro	1889	NA	NA	CPYR_178.002	Doitsu	Sawamura et al., 2008; Morgan, 2015	NEW: They were both found in Kanagawa prefecture in Japan, but it's hard to tell who is parent and who is offspring. Doitsu Discovered in 1882 and Chojuro (Choujuurou) sown in 1889, fruited in 1893
PI 541420	CPYR_1360.001	Pyrus communis	OHxF 230	1952	CPYR_431.001	Old Home	CPYR_38.001_07	Bartlett	Postman et al., 2013	confirmed
PI 541421	CPYR_1361.001	Pyrus communis	OHxF 9	NA	CPYR_431.001	Old Home	CPYR_38.001_07	Bartlett	Postman et al., 2013	confirmed
PI 541422	CPYR_1362.001	Pyrus communis	OHxF 247	1952	CPYR_431.001	Old Home	CPYR_63.001	Anjou	Postman et al., 2013	NEW: As OHxF it was bealieaved to be Old Home x Bartlett
PI 541423	CPYR_1363.001	Pyrus communis	OHxF 259	1952	CPYR_431.001	Old Home	CPYR_38.001_07	Bartlett	Postman et al., 2013	confirmed
PI 541424	CPYR_1364.001	Pyrus communis	OHxF 266	1952	CPYR_431.001	Old Home	CPYR_38.001_07	Bartlett	Postman et al., 2013	confirmed
PI 541425	CPYR_1365.001	Pyrus communis	OHxF 280	1952	CPYR_431.001	Old Home	CPYR_38.001_07	Bartlett	Postman et al., 2013	confirmed
PI 541426	CPYR_1366.001	Pyrus communis	OHxF 282	1952	CPYR_431.001	Old Home	CPYR_38.001_07	Bartlett	Postman et al., 2013	confirmed
PI 541427	CPYR_1367.001	Pyrus communis	OHxF 319	1952	CPYR_431.001	Old Home	CPYR_38.001_07	Bartlett	Postman et al., 2013	confirmed
PI 541428	CPYR_1369.001	Pyrus communis	OHxF 377	1952	CPYR_431.001	Old Home	CPYR_38.001_07	Bartlett	Postman et al., 2013	confirmed
PI 541787	CPYR_1370.001	Pyrus hybrid	Old Home x P. betulifolia-1	NA	NA	NA	NA	NA	NCGR	NA
PI 541788	CPYR_1371.001	Pyrus hybrid	Old Home x P. betulifolia-1	NA	NA	NA	NA	NA	NCGR	NA
PI 541789	CPYR_1373.001	Pyrus hybrid	OPR-141	NA	NA	NA	CPYR_269.003	Hau Kai	NCGR	NEW
PI 541429	CPYR_1374.004	Pyrus communis subsp. pyraster	P-61 fire blight resistant rootstock	NA	NA	NA	NA	NA	NCGR	NA
PI 541430	CPYR_1375.001	Pyrus communis subsp. pyraster	OPR-001	NA	NA	NA	NA	NA	NCGR	NA
PI 541790	CPYR_1376.001	Pyrus hybrid	P. betulifolia-1 x P-12	NA	CPYR_656.001	OPR-114 P. betulifolia No. 5	CPYR_653.001	OPR-110 P. betulifolia No. 1	NCGR	NEW
PI 541791	CPYR_1377.001	Pyrus hybrid	P. betulifolia-1 x P-79	NA	NA	NA	NA	NA	NA	NA
PI 540981	CPYR_1378.001	Pyrus betulifolia	OPR-259 P. betulifolia	NA	CPYR_1263.001	P. betulifolia OSU-3	CPYR_656.001	OPR-114 P. betulifolia No. 5	NCGR	NEW
PI 540982	CPYR_1379.001	Pyrus betulifolia	OPR-260 P. betulifolia	pre 1983	CPYR_1263.001	P. betulifolia OSU-3	CPYR_656.001	OPR-114 P. betulifolia No. 5	NCGR	NEW
PI 541707	CPYR_138.001	Pyrus hybrid	Cincincis	pre 1854	CPYR_382.002	Marie Louise	NA	NA	Hedrick et al., 1921	NEW
PI 540983	CPYR_1380.001	Pyrus betulifolia	OPR-261 P. betulifolia	NA	CPYR_1263.001	P. betulifolia OSU-3	CPYR_656.001	OPR-114 P. betulifolia No. 5	NCGR	NEW
PI 540984	CPYR_1381.001	Pyrus betulifolia	OPR-262 P. betulifolia	NA	CPYR_1263.001	P. betulifolia OSU-3	CPYR_653.001	OPR-110 P. betulifolia No. 1	NCGR	NEW
PI 540985	CPYR_1382.001	Pyrus betulifolia	OPR-263 P. betulifolia	NA	CPYR_1263.001	P. betulifolia OSU-3	CPYR_656.001	OPR-114 P. betulifolia No. 5	NCGR	NEW
PI 540987	CPYR_1384.001	Pyrus betulifolia	OPR-265 P. betulifolia	NA	CPYR_1263.001	P. betulifolia OSU-3	CPYR_656.001	OPR-114 P. betulifolia No. 5	NCGR	NEW
PI 540988	CPYR_1385.001	Pyrus betulifolia	OPR-266 P. betulifolia	NA	CPYR_1263.001	P. betulifolia OSU-3	CPYR_656.001	OPR-114 P. betulifolia No. 5	NCGR	NEW
PI 541163	CPYR_139.004	Pyrus communis	Citron de Carmes (Madeleine)	NA	NA	NA	NA	NA	Hedrick et al., 1921; Morgan, 2015	NA
PI 325930	CPYR_1391.001	Pyrus dimorphophylla	P. dimorphophylla - Japan	NA	NA	NA	CPYR_1390.001	P. dimorphophylla - Japan	NCGR	NEW
PI 325930	CPYR_1390.001	Pyrus dimorphophylla	P. dimorphophylla - Japan	NA	NA	NA	NA	NA	NA	NA
PI 541606	CPYR_1393.001	Pyrus dimorphophylla	P. dimorphophylla 408 seedling C	NA	NA	NA	CPYR_1457.001	P. dimorphophylla 407	NCGR	NEW
PI 541607	CPYR_1399.001	Pyrus dimorphophylla	P. dimorphophylla 407 seedling B	NA	NA	NA	NA	NA	NA	NA
PI 430890	CPYR_1402.001	Pyrus communis	Domestic pear - Ontario Selection	NA	CPYR_1631.001	Clapp Favorite	NA	NA	NCGR	NEW
PI 541431	CPYR_1404.001	Pyrus communis	Harrow Delight (HW 603)	selected 1973	NA	NA	CPYR_38.001_07	Bartlett	Morgan, 2015	confirmed Bartlett parentage. Second parent (Purdue 80-51) is not held at NCGR
PI 541361	CPYR_141.002	Pyrus communis	Colonel Marchand	described 1912	NA	NA	CPYR_79.002	Beurré Gris d'Hiver Nouveau	Morgan, 2015	NEW
PI 541960	CPYR_1419.004	Pyrus communis	MM-38	NA	CPYR_221.001	Farmingdale	CPYR_725.002	P. nivalis P-91 (pure)	NCGR	NEW: Between 1923 and 1931 over 10,000 French Pyrus communis seedlings were grown in Oregon and repeatedly inoculated with the blight organism. P-91 was resistant. MM-38 also originated in Oregon later in the 1900's
PI 541165	CPYR_142.005	Pyrus communis	Colonel Wilder	1870	NA	NA	CPYR_249.001	Glou Morceau	Hedrick et al., 1921	NEW
PI 541434	CPYR_1421.001	Pyrus communis	P. communis OHxF?	NA	NA	NA	NA	NA	NA	NA
PI 541368	CPYR_1422.001	Pyrus communis	OPR-013 OHxF C-34	NA	CPYR_725.002	P. nivalis P-91 (pure)	CPYR_221.001	Farmingdale	NCGR	NEW: Thought OHxF. Between 1923 and 1931 over 10,000 French Pyrus communis seedlings were grown in Oregon and repeatedly inoculated with the blight organism. P-91 was resistant. OPR-013 also originated in Oregon later in the 1900's
PI 617520	CPYR_1427.001	Pyrus calleryana	OPR-168 P. calleryana	NA	NA	NA	NA	NA	NCGR	NA
PI 264695	CPYR_143.002	Pyrus communis	Coloree de Juillet	first fruited 1857	CPYR_602.004	White Doyenne	CPYR_139.004	Citron de Carmes (Madeleine)	Hedrick et al., 1921; Morgan, 2015	NEW
PI 541068	CPYR_1432.001	Pyrus calleryana	OPR-193 P. calleryana	NA	NA	NA	NA	NA	NCGR	NA
PI 541072	CPYR_1436.001	Pyrus calleryana	OPR-177 P. calleryana	NA	NA	NA	NA	NA	NCGR	NA
PI 541073	CPYR_1437.001	Pyrus calleryana	P. calleryana [C-44?]	NA	NA	NA	NA	NA	NA	NA
PI 541074	CPYR_1438.001	Pyrus calleryana	OPR-191 P. calleryana	NA	NA	NA	NA	NA	NCGR	NA
PI 541075	CPYR_1439.001	Pyrus calleryana	Autumn Blaze (P. calleryana)	NA	NA	NA	NA	NA	NA	NA
PI 541166	CPYR_144.001	Pyrus communis	Columbia	pre 1835	CPYR_602.004	White Doyenne	CPYR_51.002	Bergamotte d'Automne	Hedrick et al., 1921	NEW
PI 541076	CPYR_1440.001	Pyrus calleryana	OPR-195 P. calleryana 6 OP	NA	CPYR_1267.001	P. calleryana OSU-6	CPYR_1268.002	P. calleryana OSU-7	NCGR	NEW
PI 541792	CPYR_1449.001	Pyrus hybrid	P. hybrid (calleryana)	NA	CPYR_673.001	P. calleryana PC-5	CPYR_674.001	P. calleryana PC-6	NCGR	NEW
PI 541793	CPYR_1450.001	Pyrus hybrid	P. hybrid from Millikan	NA	CPYR_673.001	P. calleryana PC-5	CPYR_674.001	P. calleryana PC-6	NCGR	NEW
PI 541794	CPYR_1451.001	Pyrus hybrid	P. calleryana hybrid	NA	CPYR_673.001	P. calleryana PC-5	CPYR_674.001	P. calleryana PC-6	NCGR	NEW
PI 541795	CPYR_1453.001	Pyrus hybrid	P. hybrid	NA	CPYR_673.001	P. calleryana PC-5	CPYR_674.001	P. calleryana PC-6	NCGR	NEW
PI 541796	CPYR_1455.001	Pyrus hybrid	P. hybrid	NA	CPYR_673.001	P. calleryana PC-5	CPYR_674.001	P. calleryana PC-6	NCGR	NEW
PI 325927	CPYR_1456.001	Pyrus dimorphophylla	P. dimorphophylla Vo-26	NA	NA	NA	CPYR_1457.001	P. dimorphophylla 407	NCGR	NEW
PI 541609	CPYR_1457.001	Pyrus dimorphophylla	P. dimorphophylla 407	NA	NA	NA	CPYR_1390.001	P. dimorphophylla - Japan	NCGR	NEW
PI 541925	CPYR_1464.001	Pyrus pyrifolia	P. pyrifolia Kor 2	NA	NA	NA	NA	NA	NA	NA
PI 617522	CPYR_1469.001	Pyrus elaeagrifolia	P. elaeagrifolia Olez 2 glabrous - Turkey	NA	NA	NA	NA	NA	NA	NA
PI 617523	CPYR_1470.001	Pyrus elaeagrifolia	P. elaeagrifolia Olez 2 glabrous - Turkey	NA	NA	NA	NA	NA	NA	NA
PI 541628	CPYR_1473.001	Pyrus elaeagrifolia	P. elaeagrifolia Olez 2	NA	NA	NA	NA	NA	NA	NA
PI 271658	CPYR_148.001	Pyrus communis	Doyenne du Comice	first fruited 1849	CPYR_249.001	Glou Morceau	CPYR_17.001	Duchesse d'Angouleme	Hedrick et al., 1921; Morgan, 2015	NEW
PI 541800	CPYR_1480.001	Pyrus hybrid	Nelis x P. betulifolia	NA	CPYR_1164.001	Winter Nelis	NA	NA	NCGR	confirmed
PI 293846	CPYR_1482.001	Pyrus elaeagrifolia	P. elaeagrifolia - Crimea	NA	NA	NA	NA	NA	NA	NA
PI 293846	CPYR_1483.001	Pyrus elaeagrifolia	P. elaeagrifolia - Crimea	NA	NA	NA	NA	NA	NA	NA
PI 541437	CPYR_1489.001	Pyrus communis	Domestic Pear	NA	CPYR_38.001_07	Bartlett	CPYR_63.001	Anjou	NCGR	NEW
PI 212579	CPYR_149.003	Pyrus communis	Comte de Chambord	end of 1800s	CPYR_17.001	Duchesse d'Angouleme	NA	NA	Hedrick et al., 1921	NEW
PI 617525	CPYR_1490.001	Pyrus elaeagrifolia	P. elaeagrifolia QBZ glabrous	NA	NA	NA	NA	NA	NA	NA
PI 617526	CPYR_1494.001	Pyrus hybrid	P. betulifolia 2 x P. call. 2	NA	NA	NA	NA	NA	NA	NA
PI 541652	CPYR_1496.001	Pyrus fauriei	P. fauriei Rootstock Selection 12-14	NA	NA	NA	NA	NA	NA	NA
PI 541079	CPYR_1497.001	Pyrus calleryana	OPR-132 P. calleryana	NA	NA	NA	NA	NA	NCGR	NA
PI 540986	CPYR_1498.001	Pyrus betulifolia	P. betulifolia 3 No. 6	NA	CPYR_1263.001	P. betulifolia OSU-3	CPYR_656.001	OPR-114 P. betulifolia No. 5	NCGR	NEW: Reported as seedling selection of P. betulifolia No. 3 (which might be OSU-3). Second parent identified as OPR-114 P. betulifolia No. 5
PI 541167	CPYR_150.002	Pyrus communis	Comte de Lambertye	exhibited 1894	CPYR_558.002	Beurré Superfin	CPYR_38.001_07	Bartlett	Hedrick et al., 1921; Morgan, 2015	NEW: Known seedling of Beurré Superfin; second parent inferred as Bartlett
PI 478004	CPYR_1501.007	Pyrus ussuriensis	P. ussuriensis 'McDermand' (Harbin)	NA	NA	NA	NA	NA	NA	NA
PI 541983	CPYR_1509.002	Pyrus syriaca	P. syriaca No. 1 - Syria	NA	NA	NA	NA	NA	NA	NA
PI 541983	CPYR_1509.005	Pyrus syriaca	P. syriaca No. 1 - Syria	NA	NA	NA	CPYR_159.002	Coscia	NCGR	NEW: Coscia is actually Coscia Tardive
PI 280031	CPYR_151.002	Pyrus communis	Comte de Lamy	NA	NA	NA	NA	NA	Hedrick et al., 1921; Morgan, 2015	NA
PI 541980	CPYR_1510.008	Pyrus syriaca	P. syriaca No. 2 - Syria	NA	NA	NA	NA	NA	NA	NA
PI 541444	CPYR_1516.002	Pyrus communis	Stuttgarter-Geishirtle (= Zuckerbirne)	NA	NA	NA	NA	NA	NCGR	NA
PI 483369	CPYR_1523.006	Pyrus communis	Bojka	NA	NA	NA	CPYR_57.001	Besi de La Motte	NCGR	NEW
PI 483372	CPYR_1526.002	Pyrus hybrid	Ilinka	NA	NA	NA	NA	NA	Hedrick et al., 1921; Morgan, 2015	NA
PI 483374	CPYR_1528.002	Pyrus communis subsp. pyraster	Krolewka	NA	NA	NA	NA	NA	NCGR	NA
PI 483378	CPYR_1532.002	Pyrus communis	Wilenska Plenna	NA	NA	NA	CPYR_2859.001	Zutica	NCGR	NEW: Origin of Zutica and Wilenska Plenna uncertain, not sure which one came first
PI 483380	CPYR_1534.002	Pyrus hybrid	Prague No. 2	NA	CPYR_2859.001	Zutica	CPYR_162.001	Vicar of Winkfield	NCGR	NEW: Origin of Zutica and Prague No. 2 uncertain
PI 483382	CPYR_1536.002	Pyrus communis subsp. pyraster	Ananaska Ceska	NA	NA	NA	CPYR_602.004	White Doyenne	NCGR	NEW
PI 483384	CPYR_1538.001	Pyrus communis subsp. pyraster	P. communis ssp. pyraster - Poland	NA	NA	NA	NA	NA	NCGR	NA
PI 483383	CPYR_1537.001	Pyrus communis subsp. pyraster	P. communis ssp. pyraster - Poland	NA	NA	NA	NA	NA	NA	NA
PI 502173	CPYR_1633.001	Pyrus communis subsp. pyraster	P. communis ssp. pyraster - Poland	NA	NA	NA	NA	NA	NA	NA
PI 483385	CPYR_1539.001	Pyrus communis subsp. pyraster	P. communis ssp. pyraster - Poland	NA	NA	NA	NA	NA	NA	NA
PI 483386	CPYR_1540.001	Pyrus communis subsp. pyraster	P. communis ssp. pyraster - Poland	NA	NA	NA	NA	NA	NA	NA
PI 483387	CPYR_1541.001	Pyrus communis	Krupen Burnusus	NA	NA	NA	NA	NA	NCGR	NA
PI 483393	CPYR_1547.001	Pyrus communis	Zelinka	NA	NA	NA	NA	NA	NCGR	NA
PI 483399	CPYR_1549.002	Pyrus communis subsp. pyraster	Mednik	NA	NA	NA	CPYR_23.002	Arganche	NCGR	NEW
PI 483401	CPYR_1551.002	Pyrus communis subsp. pyraster	Crna Poloska	NA	NA	NA	NA	NA	NCGR	NA
PI 483403	CPYR_1553.001	Pyrus communis subsp. pyraster	Aniversarea	released 1973	CPYR_75.002	Beurré Easter	CPYR_59.002	Beurré Clairgeau	NCGR	NEW: Believed Doyenne d'Hiver (= Beurré Easter) x Cure (= Vikar of Winkfield), bu there only Beurré Easter
PI 541168	CPYR_156.001	Pyrus communis	Conference	NA	NA	NA	NA	NA	Hedrick et al., 1921; Morgan, 2015	NA
PI 541405	CPYR_1572.001	Pyrus communis	OHxF 333	1952	CPYR_431.001	Old Home	CPYR_38.001_07	Bartlett	Postman et al., 2013	NEW
PI 506364	CPYR_1574.001	Pyrus hondoensis	P. hondoensis 'Iwate Mukaku'	NA	NA	NA	NA	NA	NA	NA
PI 506365	CPYR_1575.001	Pyrus hondoensis	P. hondoensis 'Iwate Yamanashi'	NA	NA	NA	NA	NA	NCGR	NA
PI 312147	CPYR_1576.001	Pyrus communis	P. hybrid - Alma-ata (rec. as P. communis)	collected 1966	CPYR_2724.001	Comtesse de Paris	NA	NA	NCGR	NEW
PI 506368	CPYR_1577.001	Pyrus hondoensis	Iwate No. 1	NA	NA	NA	NA	NA	NCGR	NA
PI 506369	CPYR_1581.001	Pyrus hondoensis	P. hondoensis - Iwate No. 4	NA	NA	NA	NA	NA	NCGR	NA
PI 541450	CPYR_1585.001	Pyrus communis	Domestic Pear (OSU Seedling B) - looks like Bosc	NA	CPYR_38.001_07	Bartlett	CPYR_1165.001	Bosc - OP-5	NCGR	NEW
PI 541451	CPYR_1586.001	Pyrus communis	Domestic Pear (OSU Seedling C)	NA	NA	NA	CPYR_1165.001	Bosc - OP-5	NCGR	NEW
PI 541082	CPYR_1587.003	Pyrus calleryana	P. calleryana - Crown Point 5-67	NA	NA	NA	NA	NA	NA	NA
PI 541591	CPYR_1589.001	Pyrus cordata	P. cordata - Turkey	NA	NA	NA	NA	NA	NA	NA
PI 541576	CPYR_744.001	Pyrus cordata	P. cordata - Turkey	NA	NA	NA	NA	NA	NA	NA
PI 541590	CPYR_1588.001	Pyrus cordata	P. cordata - Turkey	NA	NA	NA	NA	NA	NA	NA
PI 541572	CPYR_740.001	Pyrus cordata	P. cordata - Turkey	NA	NA	NA	NA	NA	NA	NA
PI 541573	CPYR_741.001	Pyrus cordata	P. cordata - Turkey	NA	NA	NA	NA	NA	NA	NA
PI 541571	CPYR_739.001	Pyrus cordata	P. cordata - Turkey	NA	NA	NA	NA	NA	NA	NA
PI 541574	CPYR_742.001	Pyrus cordata	P. cordata - Turkey	NA	NA	NA	NA	NA	NA	NA
PI 292656	CPYR_159.002	Pyrus communis	Coscia	late 1600s	CPYR_2286.001	Coscia (Tardive?)	CPYR_77.002	Beurré Giffard	Morgan, 2015	confirmed: Coscia Tardive is actually Coscia, and vice versa
PI 541867	CPYR_1590.001	Pyrus nivalis	P. nivalis Y-5	NA	NA	NA	NA	NA	NA	NA
PI 641273	CPYR_1591.001	Pyrus pyrifolia	P. pyrifolia (hybrid)	NA	NA	NA	NA	NA	NA	NA
PI 541452	CPYR_1592.001	Pyrus communis	P. communis - root aphid resistant	NA	NA	NA	NA	NA	NA	NA
PI 541687	CPYR_1597.001	Pyrus hondoensis	P. hondoensis	NA	NA	NA	CPYR_925.001	P. hondoensis - Aonashi	NCGR	NEW
PI 541677	CPYR_806.002	Pyrus hondoensis	P. hondoensis	NA	NA	NA	NA	NA	NA	NA
PI 541675	CPYR_801.001	Pyrus hondoensis	P. hondoensis	NA	NA	NA	NA	NA	NA	NA
PI 541688	CPYR_2109.001	Pyrus hondoensis	P. hondoensis	NA	NA	NA	CPYR_925.001	P. hondoensis - Aonashi	NCGR	NEW
PI 541685	CPYR_1595.005	Pyrus hondoensis	P. hondoensis	NA	CPYR_925.001	P. hondoensis - Aonashi	CPYR_136.004	Chojuro	NCGR	NEW
PI 541683	CPYR_1593.001	Pyrus hondoensis	P. hondoensis	NA	NA	NA	CPYR_925.001	P. hondoensis - Aonashi	NCGR	NEW
PI 541674	CPYR_800.001	Pyrus hondoensis	P. hondoensis	NA	NA	NA	NA	NA	NA	NA
PI 541678	CPYR_807.001	Pyrus hondoensis	P. hondoensis	NA	NA	NA	NA	NA	NA	NA
PI 541676	CPYR_803.001	Pyrus hondoensis	P. hondoensis	NA	NA	NA	CPYR_925.001	P. hondoensis - Aonashi	NCGR	NEW: Not sure about the direction of this duo
PI 540936	CPYR_1600.001	Pyrus spinosa	P. spinosa (amygdaliformis) - Sardinia	NA	NA	NA	NA	NA	NA	NA
PI 540934	CPYR_1598.001	Pyrus spinosa	P. spinosa (amygdaliformis) - Sardinia	NA	NA	NA	NA	NA	NA	NA
PI 541083	CPYR_1601.001	Pyrus calleryana	P. calleryana OSU-10	NA	NA	NA	NA	NA	NA	NA
PI 541564	CPYR_1602.001	Pyrus communis subsp. caucasica	P. communis ssp. caucasica - P. Stark	NA	NA	NA	NA	NA	NA	NA
PI 293843	CPYR_1604.001	Pyrus hybrid	P. elaeagrifolia hybrid - Crimea	NA	NA	NA	NA	NA	NA	NA
PI 293844	CPYR_1605.001	Pyrus hybrid	P. elaeagrifolia hybrid - Crimea	NA	NA	NA	NA	NA	NA	NA
PI 293845	CPYR_1603.001	Pyrus hybrid	P. elaeagrifolia hybrid - Crimea	NA	NA	NA	NA	NA	NA	NA
PI 541899	CPYR_895.001	Pyrus pyrifolia	P. pyrifolia	NA	NA	NA	NA	NA	NA	NA
PI 541929	CPYR_1606.001	Pyrus pyrifolia	P. pyrifolia	NA	NA	NA	CPYR_294.001	Imamura Aki	NCGR	NEW
PI 541453	CPYR_1607.001	Pyrus communis	P. communis (Imp. Fr.)	NA	NA	NA	NA	NA	NA	NA
PI 540937	CPYR_1608.001	Pyrus spinosa	P. spinosa (amygdaliformis) - Greece (Epires)	NA	NA	NA	NA	NA	NA	NA
PI 540929	CPYR_634.001	Pyrus spinosa	P. spinosa (amygdaliformis) - Turkey	NA	NA	NA	NA	NA	NA	NA
PI 540939	CPYR_1610.001	Pyrus spinosa	P. spinosa (amygdaliformis) - Turkey	NA	NA	NA	NA	NA	NA	NA
PI 540938	CPYR_1609.003	Pyrus spinosa	P. spinosa (amygdaliformis) - Turkey	NA	NA	NA	NA	NA	NA	NA
PI 540940	CPYR_1611.001	Pyrus spinosa	P. spinosa (amygdaliformis) - Turkey	NA	NA	NA	NA	NA	NA	NA
PI 540924	CPYR_633.001	Pyrus spinosa	P. spinosa (amygdaliformis) - Turkey	NA	NA	NA	NA	NA	NA	NA
PI 540941	CPYR_1612.001	Pyrus spinosa	P. spinosa (amygdaliformis) - Turkey	NA	NA	NA	NA	NA	NA	NA
PI 540930	CPYR_635.001	Pyrus spinosa	P. spinosa (amygdaliformis) - Turkey	NA	NA	NA	NA	NA	NA	NA
PI 541454	CPYR_1613.001	Pyrus communis	OHxF 58	1952	CPYR_431.001	Old Home	CPYR_38.001_07	Bartlett	Postman et al., 2013	confirmed
PI 541084	CPYR_1614.001	Pyrus calleryana	P. calleryana (hybrid)	NA	NA	NA	NA	NA	NA	NA
PI 541027	CPYR_672.002	Pyrus calleryana	P. calleryana (hybrid)	NA	NA	NA	NA	NA	NA	NA
PI 349023	CPYR_1615.001	Pyrus spinosa	P. spinosa (amygdaliformis) - Macedonia (long chill required)	NA	NA	NA	NA	NA	NA	NA
PI 542022	CPYR_1617.002	Pyrus ×bretschneideri	Xiangshui Li [Hsiang Sui-Li]	NA	NA	NA	NA	NA	NCGR	NA
PI 449288	CPYR_162.001	Pyrus communis	Vicar of Winkfield	1760	CPYR_51.002	Bergamotte d'Automne	NA	NA	Hedrick et al., 1921; Morgan, 2015	NEW
PI 541961	CPYR_1620.001	Pyrus communis	Unknown Cultivar [Bartlett type but round]	NA	CPYR_1164.001	Winter Nelis	CPYR_38.001_07	Bartlett	NCGR	NEW
PI 502166	CPYR_1626.001	Pyrus communis	Saafaranja	NA	NA	NA	CPYR_2510.002	Blanquilla (=Spadona)	NCGR	NEW
PI 502167	CPYR_1627.001	Pyrus communis	Sarajka	NA	NA	NA	CPYR_1275.001	Cherry Pear	NCGR	NEW: unsure which one came first
PI 502170	CPYR_1630.001	Pyrus communis	Edmundka	NA	CPYR_1652.001_2	Madame Treyve	CPYR_305.005	Josephine de Malines	NCGR	NEW
PI 502171	CPYR_1631.001	Pyrus communis	Clapp Favorite	first recorded 1860	CPYR_2724.001	Comtesse de Paris	CPYR_38.001_07	Bartlett	Hedrick et al., 1921; Morgan, 2015	confirmed
PI 502175	CPYR_1635.001	Pyrus communis	Urechelnite	NA	NA	NA	NA	NA	NCGR	NA
PI 502178	CPYR_1638.001	Pyrus communis	P. communis - Macedonia (Smiljevka?)	NA	NA	NA	NA	NA	NA	NA
PI 502179	CPYR_1639.001	Pyrus hybrid	Sbkta (P. elaeagrifolia)	NA	NA	NA	NA	NA	NCGR	NA
PI 502180	CPYR_1640.001	Pyrus communis	P. communis - Macedonia	NA	NA	NA	NA	NA	NA	NA
PI 541459	CPYR_1646.001	Pyrus communis	Coscia (Precoce?)	pre 1958	NA	NA	CPYR_2286.001	Coscia (Tardive?)	Morgan, 2015	confirmed: Coscia Tardive is actually Coscia
PI 541805	CPYR_1648.001	Pyrus pyrifolia	Koyama Pear	selected 1980s	CPYR_136.004	Chojuro	NA	NA	NCGR	NEW: Believed seedling of Nijisseiki, here not confirmed
PI 541169	CPYR_165.001	Pyrus communis	Dana Hovey	introduced 1854	CPYR_393.003	Messire Jean	CPYR_519.001	Seckel	Hedrick et al., 1921; Morgan, 2015	NEW: Believed Winter Nelis x Seckel, but here only Seckel confirmed
PI 542037	CPYR_880.001	Pyrus ×phaeocarpa	P. x phaeocarpa	NA	NA	NA	NA	NA	NA	NA
PI 46582	CPYR_1650.001	Pyrus ×phaeocarpa	P. x phaeocarpa	NA	NA	NA	NA	NA	NA	NA
PI 141256	CPYR_1652.001_2	Pyrus communis	Madame Treyve	1848	CPYR_38.001_07	Bartlett	CPYR_410.001	Napoleon	Hedrick et al., 1921; Morgan, 2015	NEW
PI 541807	CPYR_1658.001	Pyrus hybrid	NY 10262	NA	CPYR_519.001	Seckel	NA	NA	NCGR	confirmed Seckel parentage: Seckel x Illinois 65, but Illinois 65 was not analysed in this study
PI 541809	CPYR_1660.001	Pyrus hybrid	NY 10353	NA	NA	NA	CPYR_2724.001	Comtesse de Paris	Pasqualini et al., 2006	confirmed Flemish Beauty (= Comtesse de Paris) parentage: NY 10257 (﻿Illinois 65 x Bartlett or Seckel) x Flemish Beauty. NY 10257 and Illinois 65 were not analysed in this study
PI 506385	CPYR_1663.001	Pyrus hybrid	Para de Zahar de Bihor	NA	NA	NA	NA	NA	NCGR	NA
PI 506388	CPYR_1664.001	Pyrus communis	Poznica	NA	NA	NA	NA	NA	NCGR	NA
PI 506363	CPYR_1666.001	Pyrus ussuriensis	Sotoorihime	NA	NA	NA	NA	NA	NCGR	NA
PI 506378	CPYR_1670.001	Pyrus communis	Romania Perry Pear	NA	NA	NA	NA	NA	NCGR	NA
PI 506379	CPYR_1684.001	Pyrus communis subsp. pyraster	P. communis ssp. pyraster - Romania	NA	NA	NA	NA	NA	NA	NA
PI 506380	CPYR_1671.001	Pyrus communis subsp. pyraster	P. communis ssp. pyraster - Romania	NA	NA	NA	NA	NA	NA	NA
PI 506376	CPYR_1673.001	Pyrus hybrid	Saprani II	NA	NA	NA	NA	NA	NCGR	NA
PI 506373	CPYR_1674.002	Pyrus communis subsp. pyraster	P. communis ssp. pyraster - Serbia	NA	NA	NA	NA	NA	NCGR	NA
PI 506371	CPYR_1677.001	Pyrus hybrid	Panajurka	NA	NA	NA	CPYR_1551.002	Crna Poloska	NCGR	NEW: not sure which one came first
PI 506362	CPYR_1678.001	Pyrus ×bretschneideri	Ya Li	NA	NA	NA	NA	NA	NCGR	NA
PI 541170	CPYR_168.001	Pyrus communis	Dawn	introduced 1962	US-Michigan437	US-Michigan 437	CPYR_148.001	Doyenne du Comice	Morgan, 2015	confirmed
PI 506372	CPYR_1687.002	Pyrus communis	Roosevelt	introduced 1905	CPYR_2724.001	Comtesse de Paris	CPYR_59.002	Beurré Clairgeau	Hedrick et al., 1921; Morgan, 2015	NEW
PI 506377	CPYR_1689.001	Pyrus hybrid	Winioska-Saska	NA	NA	NA	CPYR_305.005	Josephine de Malines	NCGR	NEW
PI 541171	CPYR_169.002	Pyrus communis	Delices d'Avril	listed 1912	CPYR_593.002	Verte Longue d'Automne	CPYR_78.002	Beurré Gris	NCGR	NEW
PI 506383	CPYR_1690.003	Pyrus communis	Tamiioase de Calinesti	NA	CPYR_602.004	White Doyenne	CPYR_51.002	Bergamotte d'Automne	NCGR	NEW
PI 541953	CPYR_1697.001	Pyrus salicifolia	P. salicifolia (hybrid) - Russia	NA	CPYR_2760.001	P. salicifolia N1 - Russia	NA	NA	NCGR	NEW: Not sure about direction of this duo
PI 541953	CPYR_1697.002	Pyrus salicifolia	P. salicifolia (hybrid) - Russia	NA	CPYR_2760.001	P. salicifolia N1 - Russia	NA	NA	NCGR	NEW: Not sure about direction of this duo
PI 541303	CPYR_17.001	Pyrus communis	Duchesse d'Angouleme	propagated 1808	CPYR_602.004	White Doyenne	NA	NA	Hedrick et al., 1921; Morgan, 2015	NEW
PI 277420	CPYR_170.001	Pyrus hybrid	Dessertnaia	NA	CPYR_2386.001	Michurin Beurré Zimnaya (Winter)	CPYR_2724.001	Comtesse de Paris	NCGR	NEW
PI 541465	CPYR_1700.002	Pyrus communis	Perazola	NA	CPYR_451.002	Petit Blanquet	CPYR_2978.001	Malti	NCGR	NEW: Petit Blanquet ﻿known in French gardens since 1500's; Malti donated from Tunisia. Perazola was developed in Sicily
PI 541812	CPYR_1702.001	Pyrus hybrid	South Dakota E-31	NA	NA	NA	NA	NA	NCGR	NA
PI 541810	CPYR_1703.001	Pyrus hybrid	P. hybrid V-103 - Nepal	NA	NA	NA	NA	NA	NA	NA
PI 541468	CPYR_1705.003	Pyrus communis	P. communis o.p. - Uzbekistan	NA	NA	NA	NA	NA	NA	NA
PI 541471	CPYR_1721.004	Pyrus communis	P. communis o.p. - Uzbekistan	NA	NA	NA	NA	NA	NA	NA
PI 541469	CPYR_1710.001	Pyrus communis	P. communis o.p. - Uzbekistan	NA	NA	NA	NA	NA	NA	NA
PI 541471	CPYR_1721.003	Pyrus communis	P. communis o.p. - Uzbekistan	NA	NA	NA	NA	NA	NA	NA
PI 541471	CPYR_1721.001	Pyrus communis	P. communis o.p. - Uzbekistan	NA	NA	NA	NA	NA	NA	NA
PI 541468	CPYR_1705.001	Pyrus communis	P. communis o.p. - Uzbekistan	NA	NA	NA	NA	NA	NA	NA
PI 541468	CPYR_1705.002	Pyrus communis	P. communis o.p. - Uzbekistan	NA	NA	NA	NA	NA	NA	NA
PI 541087	CPYR_1707.001	Pyrus calleryana	P. calleryana o.p. - Uzbekistan	NA	NA	NA	NA	NA	NA	NA
PI 542035	CPYR_1708.005	Pyrus ×canescens	P. x canescens 1213 - Uzbekistan	NA	NA	NA	NA	NA	NA	NA
PI 279333	CPYR_171.002	Pyrus communis	Urbaniste	pre 1783	NA	NA	CPYR_602.004	White Doyenne	Hedrick et al., 1921	NEW
PI 541630	CPYR_1711.001	Pyrus elaeagrifolia	P. elaeagrifolia hybrid - Uzbekistan	NA	NA	NA	NA	NA	NA	NA
PI 541869	CPYR_1714.001	Pyrus nivalis	P. nivalis 1219 - Uzbekistan	NA	NA	NA	NA	NA	NA	NA
PI 541869	CPYR_1714.002	Pyrus nivalis	P. nivalis 1219 - Uzbekistan	NA	NA	NA	NA	NA	NA	NA
PI 541869	CPYR_1714.003	Pyrus nivalis	P. nivalis 1219 - Tashkent sdlg. 3	NA	NA	NA	NA	NA	NA	NA
PI 541869	CPYR_1714.004	Pyrus nivalis	P. nivalis 1219 - Uzbekistan	NA	NA	NA	NA	NA	NA	NA
PI 541472	CPYR_1725.002	Pyrus communis	Cascade	1940s	CPYR_38.001_07	Bartlett	CPYR_148.001	Doyenne du Comice	Morgan, 2015	confirmed
PI 541172	CPYR_173.001	Pyrus communis	Devoe	released 1947	CPYR_1631.001	Clapp Favorite	CPYR_179.002	Dorset	NCGR	NEW: Known Clapp Favorite o.p., here pollen parent inferred as Dorset
PI 617503	CPYR_174.002	Pyrus communis	Directeur Hardy	introduced 1893	CPYR_382.002	Marie Louise	CPYR_59.002	Beurré Clairgeau	Hedrick et al., 1921; Morgan, 2015	NEW
PI 541708	CPYR_175.002	Pyrus hybrid	Dixie	introduced 1914	CPYR_2732.001	Le Conte	CPYR_1166.001	Kieffer	Hedrick et al., 1921	NEW: Believed Le Conte x Sand Pear, which might be Kieffer
PI 324121	CPYR_176.001	Pyrus communis	Djebel Goutava	NA	CPYR_38.001_07	Bartlett	CPYR_79.002	Beurré Gris d'Hiver Nouveau	NCGR	NEW
PI 541173	CPYR_177.004	Pyrus communis	Docteur Desportes	1854	CPYR_249.001	Glou Morceau	CPYR_17.001	Duchesse d'Angouleme	Morgan, 2015	NEW
PI 228012	CPYR_178.002	Pyrus pyrifolia	Doitsu	NA	NA	NA	NA	NA	Sawamura et al., 2008	NA
PI 541174	CPYR_179.002	Pyrus communis	Dorset	intorduced 1895	NA	NA	CPYR_63.001	Anjou	Hedrick et al., 1921; Morgan, 2015	NEW
PI 295089	CPYR_181.001	Pyrus communis	Doyenne d'Alecon	pre 1628	NA	NA	CPYR_602.004	White Doyenne	Hedrick et al., 1921; Morgan, 2015	NEW
PI 260197	CPYR_184.002	Pyrus communis	Doyenne de Juillet	1800	CPYR_602.004	White Doyenne	CPYR_139.004	Citron de Carmes (Madeleine)	Hedrick et al., 1921; Morgan, 2015	NEW
PI 541362	CPYR_186.004	Pyrus communis	Doyenne de Saumur	early 1800s	CPYR_602.004	White Doyenne	CPYR_162.001	Vicar of Winkfield	Hedrick et al., 1921	NEW
PI 255610	CPYR_189.003	Pyrus communis	Doyenne Flon Aine	1859	CPYR_249.001	Glou Morceau	CPYR_75.002	Beurré Easter	Hedrick et al., 1921	NEW
PI 541176	CPYR_190.002	Pyrus communis	Doyenne Goubault	reported 1869	CPYR_249.001	Glou Morceau	CPYR_17.001	Duchesse d'Angouleme	Hedrick et al., 1921	NEW
PI 541178	CPYR_192.001	Pyrus communis	Docteur Jules Guyot (=Limonera)	1870	CPYR_38.001_07	Bartlett	CPYR_59.002	Beurré Clairgeau	Hedrick et al., 1921; Morgan, 2015	NEW
PI 541180	CPYR_196.002	Pyrus communis	Duchesse de Berry d'Ete	1827	NA	NA	CPYR_602.004	White Doyenne	Hedrick et al., 1921	NEW
PI 279330	CPYR_197.002	Pyrus communis	Duchesse de Bordeaux (= Beurré Perrault)	pre 1850	CPYR_249.001	Glou Morceau	CPYR_17.001	Duchesse d'Angouleme	Hedrick et al., 1921; Morgan, 2015	NEW
PI 541181	CPYR_199.001	Pyrus communis	Duchesse de Brissac	first fruited 1861	CPYR_249.001	Glou Morceau	CPYR_38.001_07	Bartlett	Hedrick et al., 1921	NEW
PI 541636	CPYR_2.006	Pyrus fauriei	P. fauriei - Korea OP seedling	NA	NA	NA	NA	NA	NA	NA
PI 541183	CPYR_202.003	Pyrus communis	Early Harvest (=Chambers)	NA	NA	NA	NA	NA	Hedrick et al., 1921	NA
PI 541479	CPYR_2022.001	Pyrus communis	Laxinoua	NA	NA	NA	NA	NA	NCGR	NA
PI 541485	CPYR_2028.003	Pyrus communis	Hessle	reported 1884	CPYR_17.001	Duchesse d'Angouleme	NA	NA	Hedrick et al., 1921; Morgan, 2015	NEW
PI 541486	CPYR_2029.001	Pyrus communis	Winnals Longdon	NA	NA	NA	NA	NA	Morgan, 2015	NA
PI 541488	CPYR_2031.001	Pyrus communis	Olivier de Serres	exhibited 1862	NA	NA	CPYR_75.002	Beurré Easter	Hedrick et al., 1921; Morgan, 2015	NEW
PI 541489	CPYR_2032.002	Pyrus communis	Alexandrina Bivort	1854	CPYR_139.004	Citron de Carmes (Madeleine)	CPYR_2571.001	Soldat Laboureur	Hedrick et al., 1921; Morgan, 2015	NEW: It was believed Bartlett seedling, here not confirmed. Guenette/Green Chisel, 1675; Soldat Laboureur, 1817-20
PI 541813	CPYR_2034.001	Pyrus ussuriensis	Shi Hua Li seedling	NA	NA	NA	CPYR_1678.001	Ya Li	NCGR	NEW: Shi Hua Li is not held at NCGR
PI 324053	CPYR_2036.001	Pyrus hybrid	P. hybrid - Ukraine	NA	NA	NA	NA	NA	NA	NA
PI 541184	CPYR_204.001	Pyrus communis	Early Seckel	1906	CPYR_519.001	Seckel	NA	NA	Morgan, 2015	confirmed
PI 324035	CPYR_2043.001	Pyrus communis subsp. caucasica	P. communis ssp. caucasica - Caucasus Mts. Russia	NA	NA	NA	NA	NA	NA	NA
PI 324038	CPYR_2045.001	Pyrus communis subsp. caucasica	P. communis ssp. caucasica - Caucasus Mts. Russia	NA	NA	NA	NA	NA	NA	NA
PI 324044	CPYR_2050.001	Pyrus communis subsp. caucasica	P. communis ssp. caucasica - Caucasus Mts. Russia	NA	NA	NA	NA	NA	NA	NA
PI 324047	CPYR_2053.001	Pyrus communis subsp. caucasica	P. communis ssp. caucasica - Caucasus Mts. Russia	NA	NA	NA	NA	NA	NA	NA
PI 324043	CPYR_2049.001	Pyrus communis subsp. caucasica	P. communis ssp. caucasica - Caucasus Mts. Russia	NA	NA	NA	NA	NA	NA	NA
PI 324050	CPYR_2056.001	Pyrus communis subsp. caucasica	P. communis ssp. caucasica - Caucasus Mts. Russia	NA	NA	NA	NA	NA	NA	NA
PI 392319	CPYR_205.002	Pyrus communis	Ecmianka	NA	NA	NA	NA	NA	NCGR	NA
PI 541490	CPYR_2057.001	Pyrus communis subsp. pyraster	P. communis ssp. pyraster 'Olez Brown' - Turkey	NA	NA	NA	NA	NA	NA	NA
PI 293842	CPYR_2062.001	Pyrus communis subsp. pyraster	P. communis ssp. pyraster - Moldavia	NA	NA	NA	NA	NA	NA	NA
PI 293842	CPYR_2059.001	Pyrus communis subsp. pyraster	P. communis ssp. pyraster - Moldavia	NA	NA	NA	NA	NA	NA	NA
PI 311714	CPYR_206.001	Pyrus communis	Eletta Morettini	introduced 1963	CPYR_1187.001	Beurré Hardy	CPYR_441.001	Passe Crassane	Morgan, 2015	confirmed
PI 293838	CPYR_2060.001	Pyrus communis subsp. pyraster	P. communis ssp. pyraster - Crimea	NA	NA	NA	NA	NA	NA	NA
PI 293834	CPYR_2066.001	Pyrus communis subsp. pyraster	P. communis ssp. pyraster - Crimea	NA	NA	NA	NA	NA	NA	NA
PI 293837	CPYR_2064.001	Pyrus communis subsp. pyraster	P. communis ssp. pyraster - Crimea	NA	NA	NA	NA	NA	NA	NA
PI 293833	CPYR_2067.001	Pyrus communis subsp. pyraster	P. communis ssp. pyraster- Yedentsi Forest	NA	NA	NA	NA	NA	NA	NA
PI 293841	CPYR_2068.001	Pyrus communis subsp. pyraster	P. communis ssp. pyraster - Kholorash	NA	NA	NA	NA	NA	NA	NA
PI 541089	CPYR_2086.001	Pyrus calleryana	OPR-156 P. calleryana	NA	NA	NA	NA	NA	NCGR	NA
PI 541092	CPYR_2089.001	Pyrus calleryana	OPR-187 P. calleryana	NA	NA	NA	NA	NA	NCGR	NA
PI 541094	CPYR_2091.001	Pyrus calleryana	OPR-138 P. calleryana	NA	NA	NA	NA	NA	NCGR	NA
PI 541098	CPYR_2095.001	Pyrus calleryana	OPR-220 P. calleryana	NA	NA	NA	NA	NA	NCGR	NA
PI 290783	CPYR_210.003	Pyrus communis	Epine de Mai	1760	CPYR_593.002	Verte Longue d'Automne	CPYR_602.004	White Doyenne	Hedrick et al., 1921; Morgan, 2015	NEW
PI 541501	CPYR_2105.002	Pyrus communis	June Sugar	NA	NA	NA	NA	NA	NCGR	NA
PI 541505	CPYR_2110.004	Pyrus communis	Nova	NA	CPYR_2724.001	Comtesse de Paris	NA	NA	NCGR	NEW
PI 541507	CPYR_2113.002	Pyrus communis	Idaho	1867	CPYR_38.001_07	Bartlett	CPYR_75.002	Beurré Easter	Hedrick et al., 1921; Morgan, 2015	NEW
PI 541689	CPYR_2117.002	Pyrus hondoensis	P. hondoensis - Japan	NA	NA	NA	NA	NA	NA	NA
PI 541510	CPYR_2118.001	Pyrus communis	Fin de Siecle	first fruited 1899	NA	NA	CPYR_1187.001	Beurré Hardy	Morgan, 2015	NEW: Believed seedling of Souvenir de Lydie, which is not present at the NCGR
PI 541511	CPYR_2119.002	Pyrus communis	Muscat	NA	NA	NA	NA	NA	Morgan, 2015	NA
PI 541515	CPYR_2123.002	Pyrus communis	Beurré Naghin	1840	NA	NA	CPYR_249.001	Glou Morceau	Hedrick et al., 1921; Morgan, 2015	NEW
PI 541516	CPYR_2124.002	Pyrus communis	Doree de Bourgogne	NA	NA	NA	CPYR_249.001	Glou Morceau	NCGR	NEW
PI 541517	CPYR_2125.001	Pyrus communis	President Deviolaine	NA	CPYR_249.001	Glou Morceau	CPYR_59.002	Beurré Clairgeau	NCGR	NEW
PI 541519	CPYR_2127.002	Pyrus communis	Passe Colmar	1758-60	NA	NA	CPYR_75.002	Beurré Easter	Hedrick et al., 1921; Morgan, 2015	NEW:Uncertain which one is the parent, but this might be right direction of this duo, since White Doyenne x Passe Colmar not = Beurré Easter
PI 541520	CPYR_2128.001	Pyrus communis	Swiss Bergamotte	NA	NA	NA	NA	NA	Hedrick et al., 1921	NA
PI 541521	CPYR_2129.002	Pyrus communis	Pierre Corneille	introduced 1894	CPYR_59.002	Beurré Clairgeau	NA	NA	Hedrick et al., 1921; Morgan, 2015	NEW: Believed Beurre Diel x Doyenne du Comice, here not confirmed
PI 541522	CPYR_2130.001	Pyrus communis	Charles Ernest	introduced 1879	CPYR_59.002	Beurré Clairgeau	NA	NA	Hedrick et al., 1921; Morgan, 2015	NEW
PI 541523	CPYR_2131.001	Pyrus communis	Bergamotte de Baillargues	NA	NA	NA	NA	NA	NCGR	NA
PI 541533	CPYR_2141.002	Pyrus communis	Anderson (Andy)	released 1970	CPYR_38.001_07	Bartlett	NA	NA	NCGR	NEW: Believed Bartlett x Rosee de Juillet, but here only Bartlett confirmed
PI 541461	CPYR_2143.001	Pyrus communis	F.12-173 (P-2366)	NA	NA	NA	NA	NA	NA	NA
PI 541462	CPYR_2144.001	Pyrus communis	G.28.120 (P-2363)	NA	NA	NA	NA	NA	NA	NA
PI 541931	CPYR_2149.002	Pyrus pyrifolia	Hosui	1954	NA	NA	CPYR_322.001	Kosui	Sawamura et al., 2008	confirmed
PI 541709	CPYR_216.002	Pyrus hybrid	Estella	listed 1926	CPYR_1166.001	Kieffer	CPYR_519.001	Seckel	NCGR	NEW: Estella known seedling of Kieffer. Second parent inferred as Seckel
PI 541710	CPYR_217.004	Pyrus hybrid	Eureka	fruited 1900	CPYR_1166.001	Kieffer	CPYR_519.001	Seckel	Hedrick et al., 1921	confirmed
PI 541104	CPYR_2185.001	Pyrus calleryana	Redspire (P. calleryana)	NA	NA	NA	NA	NA	NCGR	NA
PI 541105	CPYR_2186.001	Pyrus calleryana	Chanticleer (P. calleryana)	NA	NA	NA	NA	NA	NCGR	NA
PI 541107	CPYR_2188.001	Pyrus calleryana	Grant St. Yellow (P. calleryana)	NA	NA	NA	NA	NA	NCGR	NA
PI 541108	CPYR_2189.001	Pyrus calleryana	Aristocrat (P. calleryana)	NA	NA	NA	NA	NA	NCGR	NA
PI 541109	CPYR_2190.001	Pyrus calleryana	Avery Park (P. calleryana) - upright	NA	NA	NA	NA	NA	NCGR	NA
PI 541536	CPYR_2199.001	Pyrus communis	Doyenne du Comice - Crimson Gem #2	NA	CPYR_148.001	Doyenne du Comice	CPYR_38.001_07	Bartlett	NCGR	NEW: believed red sport of 'Regal Red Comice', instead is its offpsring
PI 617528	CPYR_2205.001	Pyrus hybrid	Nijisseiki x D'Anjou	NA	CPYR_38.001_07	Bartlett	NA	NA	NCGR	NEW: Nijisseiki already known not be the parent; it is believed to be the cultivar 20th century, which is not held at the NCGR. Anjou parentage not confirmed
PI 541537	CPYR_2206.002	Pyrus communis	Orcas	1966	CPYR_38.001_07	Bartlett	CPYR_148.001	Doyenne du Comice	NCGR	NEW
PI 541538	CPYR_2207.001	Pyrus communis	Rescue	NA	CPYR_59.002	Beurré Clairgeau	CPYR_1631.001	Clapp Favorite	NCGR	NEW
PI 541188	CPYR_221.001	Pyrus communis	Farmingdale	1921	CPYR_63.001	Anjou	CPYR_17.001	Duchesse d'Angouleme	Bassil & Postman, 2010	NEW: Anjou parentage confirmed, found pollen parent as Duchesse d'Angouleme
PI 255611	CPYR_222.003	Pyrus communis	Favorite Morel	1874	CPYR_59.002	Beurré Clairgeau	NA	NA	Hedrick et al., 1921	NEW: Believed seedling of Bartlett, here not confirmed
PI 541309	CPYR_224.001	Pyrus communis	Fertility (not 4x)	NA	NA	NA	NA	NA	Hedrick et al., 1921; Morgan, 2015	NA
PI 541539	CPYR_2253.006	Pyrus communis	Figue d'Alencon	1829	CPYR_1164.001	Winter Nelis	CPYR_38.001_07	Bartlett	Hedrick et al., 1921; Morgan, 2015	NEW
PI 541965	CPYR_2254.002	Pyrus ussuriensis	Nan Guo Li [Nangon Li]	NA	CPYR_269.003	Hau Kai	CPYR_1617.002	Xiangshui Li [Hsiang Sui-Li]	NCGR	NEW: Hau Kai and Nan Guo Li very old cultivars from Liaoning (Northeast) China. Sion Szu Mi identical to: Ta-Shian-Sui Li (= Dangshansuli?), Xiangshui Li [Hsiang Sui-Li] and Szumi.
PI 541540	CPYR_2266.003	Pyrus communis	Laxton's Record	introduced 1936	CPYR_335.001	Lajre (3x)	CPYR_148.001	Doyenne du Comice	Morgan, 2015	NEW: Believed Marie Louise x Comice, however identity of Marie Louise in this study is uncertain
PI 541541	CPYR_2267.003	Pyrus communis	Laxton's Early Market	1907	CPYR_382.002	Marie Louise	CPYR_184.002	Doyenne de Juillet	Morgan, 2015	confirmed
PI 541542	CPYR_2268.002	Pyrus communis	Laxton's Foremost	1901	CPYR_2567.002	Souvenir du Congress	CPYR_558.002	Beurré Superfin	Morgan, 2015	NEW: Believed Marechal du Coeur x Fertility, here not confirmed
PI 541543	CPYR_2269.001	Pyrus communis	Laxton's Superb	1901	CPYR_38.001_07	Bartlett	CPYR_558.002	Beurré Superfin	Morgan, 2015	confirmed
PI 541545	CPYR_2271.001	Pyrus communis	Princess	1875	CPYR_382.002	Marie Louise	NA	NA	Hedrick et al., 1921; Morgan, 2015	confirmed: Believed seedling of Louise Bonne Jersey (= d'Avranche), which migth be identical to Marie Luoise
PI 541546	CPYR_2272.001	Pyrus communis	Ottawa 291 [O-291]	pre 1940s	CPYR_1164.001	Winter Nelis	CPYR_38.001_07	Bartlett	NCGR	confirmed
PI 541547	CPYR_2273.001	Pyrus communis	Golden Spice	1914	CPYR_2724.001	Comtesse de Paris	NA	NA	NCGR	NEW
PI 541967	CPYR_2275.001	Pyrus communis	Romania 138-31-38	NA	CPYR_2724.001	Comtesse de Paris	CPYR_305.005	Josephine de Malines	NCGR	NEW
PI 541968	CPYR_2276.001	Pyrus communis	Romania 138-5-22	NA	CPYR_1187.001	Beurré Hardy	CPYR_59.002	Beurré Clairgeau	NCGR	NEW
PI 541969	CPYR_2277.001	Pyrus communis	Romania 17-4/5-32	NA	CPYR_17.001	Duchesse d'Angouleme	CPYR_1631.001	Clapp Favorite	NCGR	NEW
PI 541549	CPYR_2278.002	Pyrus communis	Pioneer No. 3	first fruited 1931	CPYR_519.001	Seckel	NA	NA	NCGR	NEW
PI 541550	CPYR_2279.001	Pyrus communis	Remy Chatenay	listed 1895	CPYR_249.001	Glou Morceau	CPYR_75.002	Beurré Easter	Hedrick et al., 1921; Morgan, 2015	NEW
PI 263680	CPYR_228.001	Pyrus communis	Belle Lucrative (=Fondante D'Automne)	1827	NA	NA	CPYR_602.004	White Doyenne	Hedrick et al., 1921; Morgan, 2015	NEW
PI 541551	CPYR_2280.001	Pyrus communis	Poirier Fleurissant Tard	NA	NA	NA	NA	NA	Morgan, 2015	NA
PI 541552	CPYR_2281.001	Pyrus communis	Doyenne Perault	reported 1876	NA	NA	CPYR_75.002	Beurré Easter	Hedrick et al., 1921	NEW
PI 541553	CPYR_2282.001	Pyrus communis	Jeanne d'Arc	1885	CPYR_249.001	Glou Morceau	NA	NA	Hedrick et al., 1921; Morgan, 2015	NEW: believed Beurré Diel x Comice, here not confirmed
PI 541554	CPYR_2283.001	Pyrus communis	Frangipane	NA	NA	NA	NA	NA	Hedrick et al., 1921; Morgan, 2015	NA
PI 541555	CPYR_2284.001	Pyrus communis	Fiorenza	pre 1952	CPYR_192.001	Docteur Jules Guyot (=Limonera)	CPYR_38.001_07	Bartlett	Morgan, 2015	confirmed
PI 541556	CPYR_2285.001	Pyrus hybrid	Ure	NA	CPYR_38.001_07	Bartlett	NA	NA	NCGR	NEW
PI 541557	CPYR_2286.001	Pyrus communis	Coscia (Tardive?)	known since 1910	CPYR_2510.002	Blanquilla (=Spadona)	CPYR_602.004	White Doyenne	Morgan, 2015	NEW: Coscia Tardive is actually Coscia, reported to have orginiated in late 1600s
PI 541970	CPYR_2288.001	Pyrus communis	B-22	NA	NA	NA	CPYR_233.001	Forelle	NCGR	NEW
PI 541971	CPYR_2289.001	Pyrus hybrid	BP-3 (B-14)	NA	NA	NA	NA	NA	NCGR	NA
PI 541972	CPYR_2290.001	Pyrus hybrid	B-27	NA	NA	NA	CPYR_233.001	Forelle	NCGR	NEW
PI 541007	CPYR_2291.006	Pyrus betulifolia	P. betulifolia - Shaanxi, China	NA	NA	NA	NA	NA	NA	NA
PI 541007	CPYR_2291.003	Pyrus betulifolia	P. betulifolia - Shaanxi, China	NA	NA	NA	NA	NA	NA	NA
PI 541559	CPYR_2292.001	Pyrus communis	Bestever	1935	CPYR_148.001	Doyenne du Comice	CPYR_359.001	Louis Pasteur	NCGR	confirmed
PI 541477	CPYR_2295.001	Pyrus communis	Hudar	NA	NA	NA	NA	NA	NCGR	NA
PI 541480	CPYR_2296.001	Pyrus communis	Manning-Miller	early 1800s	CPYR_38.001_07	Bartlett	CPYR_64.003	Beurré d'Arenberg	Morgan, 2015	NEW
PI 617529	CPYR_2297.001	Pyrus communis	Stacey	NA	NA	NA	NA	NA	NCGR	NA
PI 617530	CPYR_2298.001	Pyrus communis	Waterville	pre 1989	CPYR_2706.001	Bessemianka	CPYR_1631.001	Clapp Favorite	NCGR	NEW
PI 264694	CPYR_23.002	Pyrus communis	Arganche	NA	NA	NA	NA	NA	NCGR	NA
PI 231889	CPYR_230.001	Pyrus communis	Fondante de Charneu	NA	NA	NA	NA	NA	Hedrick et al., 1921; Morgan, 2015	NA
PI 541190	CPYR_231.002_2	Pyrus communis	Fondante de Moulins Lille	1858	CPYR_410.001	Napoleon	CPYR_75.002	Beurré Easter	Hedrick et al., 1921	NEW: Known seedling of Napoleon, second parent inferred as Beurré Easter
PI 541191	CPYR_233.001	Pyrus communis	Forelle	NA	NA	NA	NA	NA	Hedrick et al., 1921; Morgan, 2015	NA
PI 617534	CPYR_2331.001	Pyrus communis	Fame	NA	CPYR_17.001	Duchesse d'Angouleme	CPYR_382.002	Marie Louise	NCGR	NEW
PI 541506	CPYR_2332.001	Pyrus communis	Tyson	1794	NA	NA	CPYR_602.004	White Doyenne	Morgan, 2015; NCGR	NEW
PI 617535	CPYR_2334.001	Pyrus communis subsp. pyraster	French Resistant - rootstock clone	NA	NA	NA	NA	NA	NCGR	NA
PI 617537	CPYR_2338.001	Pyrus ussuriensis	Chien Li	NA	NA	NA	NA	NA	NCGR	NA
PI 617538	CPYR_2339.002	Pyrus communis	Poite Berringer	NA	CPYR_38.001_07	Bartlett	NA	NA	NCGR	NEW
PI 324127	CPYR_235.002	Pyrus communis	Fragrante	introduced 1956	CPYR_59.002	Beurré Clairgeau	CPYR_441.001	Passe Crassane	Morgan, 2015	NEW: Believed Bergamotte Esperen x Passe Crassane, but here only Passe Crassane confirmed
PI 641274	CPYR_2350.002	Pyrus salicifolia	P. salicifolia (hybrid) - Maikop, Russia	NA	CPYR_2760.001	P. salicifolia N1 - Russia	NA	NA	NCGR	NEW: This should be the right direction of this duo, since Pyrus salicifolia hybrid x White Doyenne not = Pyrus salicifolia N1
PI 617544	CPYR_2352.001	Pyrus communis	Doina	NA	CPYR_1631.001	Clapp Favorite	CPYR_233.001	Forelle	NCGR	NEW
PI 617545	CPYR_2354.001	Pyrus communis	Aromata di Bistrita	released 1967	CPYR_1631.001	Clapp Favorite	NA	NA	NCGR	NEW: Believed Clapp Favorite x Tamiioasa Robert, but here only Clapp Favorite confirmed
PI 617546	CPYR_2357.001	Pyrus communis	Republica	released 1973	CPYR_75.002	Beurré Easter	CPYR_59.002	Beurré Clairgeau	NCGR	NEW: Believed Doyenne d'Hiver (= Beurré Easter) x Madame Levavasseur, but here only Beurré Easter confirmed
PI 312498	CPYR_2358.001	Pyrus communis	Grumkower Butter Birne	early 1800s	NA	NA	CPYR_51.002	Bergamotte d'Automne	Hedrick et al., 1921	NEW: Is this the same as ﻿Beurre Grumkower in Hedrick et al. (1921)?
PI 541192	CPYR_236.002	Pyrus communis	Frederick Clapp	1870	CPYR_63.001	Anjou	CPYR_558.002	Beurré Superfin	Hedrick et al., 1921	NEW: Believed cross Urbaniste x Beurré Superfin, but here only Beurré Superfin confirmed
PI 617548	CPYR_2362.001	Pyrus hybrid	Spalding	NA	NA	NA	NA	NA	NCGR	NA
PI 617551	CPYR_2365.002	Pyrus communis	Hall 20	NA	CPYR_1164.001	Winter Nelis	CPYR_519.001	Seckel	NCGR	NEW
PI 617552	CPYR_2369.001	Pyrus communis	Cedar Lane Farm 1	NA	NA	NA	CPYR_602.004	White Doyenne	NCGR	NEW
PI 617553	CPYR_2370.001	Pyrus communis	Cedar Lane Farm 3	NA	NA	NA	NA	NA	NCGR	NA
PI 617554	CPYR_2371.001	Pyrus communis	Bantam	1914	CPYR_2724.001	Comtesse de Paris	NA	NA	NCGR	NEW
PI 617556	CPYR_2373.001	Pyrus communis	Gaspard (=Summercrisp)	NA	CPYR_2724.001	Comtesse de Paris	CPYR_433.002	Orel No. 15	NCGR	NEW
PI 637985	CPYR_2375.003	Pyrus communis	Autumn Red	released 1984	CPYR_38.001_07	Bartlett	CPYR_233.001	Forelle	NCGR	NEW
PI 688153	CPYR_2378.001	Pyrus communis	Red Silk	released 1997	CPYR_38.001_07	Bartlett	CPYR_63.001	Anjou	NCGR	NEW: Thought Bartlett x Forelle, but here only Bartlett confirmed
PI 280033	CPYR_238.003	Pyrus communis	Gansel's Bergamot	listed 1753	NA	NA	CPYR_78.002	Beurré Gris	Hedrick et al., 1921; Morgan, 2015	NEW: Beurré Gris (= Beurré Brown) origin confused, might be as early as 1628 or 1867, France; Gansel's Bergamot origin confused: believed raised 1768 from seed of Bergamotte d'Automne in UK, but it might be older and of continental origin
PI 688139	CPYR_2380.001	Pyrus communis	Rubiyat	NA	NA	NA	NA	NA	NA	NA
PI 617562	CPYR_2385.001	Pyrus communis	Harrow Sweet (HW 609) - IPR expires 2015	1992	NA	NA	CPYR_38.001_07	Bartlett	NCGR	confirmed: Harrow Sweet = Purdue 80-51 (= Early Sweet x Old Home) x Bartlett. We do not have Purdue 80-51 at the repository
PI 312503	CPYR_2386.001	Pyrus hybrid	Michurin Beurré Zimnaya (Winter)	NA	NA	NA	NA	NA	NCGR	NA
PI 541711	CPYR_239.002	Pyrus hybrid	Garber	NA	NA	NA	NA	NA	Hedrick et al., 1921	NA
PI 617563	CPYR_2392.001	Pyrus communis	Earlibrite	1954	CPYR_1631.001	Clapp Favorite	CPYR_340.001	Lawson	NCGR	NEW: Believed Clapp Favourite x Russet Bartlett, but here only Clapp Favorite confirmed
PI 617564	CPYR_2393.001	Pyrus communis	Dave's Delight	released 1986	CPYR_1062.001	Beierschmitt	CPYR_38.001_07	Bartlett	NCGR	confirmed
PI 541194	CPYR_240.002	Pyrus communis	General Galliene	listed 1912	NA	NA	CPYR_602.004	White Doyenne	NCGR	NEW
PI 260157	CPYR_241.003	Pyrus communis	General Le Clerc	pre 1950	NA	NA	CPYR_150.002	Comte de Lambertye	Morgan, 2015	NEW
PI 617566	CPYR_2425.001	Pyrus koehnei	P. koehnei - Disneyland	NA	NA	NA	NA	NA	NA	NA
PI 617568	CPYR_2427.005	Pyrus salicifolia	P. salicifolia - Russia	NA	NA	NA	NA	NA	NA	NA
PI 637987	CPYR_2433.017	Pyrus xerophila	P. xerophila? (P. bretschneideri like)	NA	NA	NA	CPYR_2681.002	Xuehuali (Snowflake)	NCGR	NEW: Not sure about direction of this duo
PI 637987	CPYR_2433.018	Pyrus xerophila	P. xerophila? (P. pashia like foliage)	NA	NA	NA	NA	NA	NA	NA
PI 637987	CPYR_2433.02	Pyrus xerophila	P. xerophila? (P. pyrifolia or pashia or calleryana hybrid?)	NA	NA	NA	NA	NA	NA	NA
PI 637987	CPYR_2433.021	Pyrus xerophila	P. xerophila?	NA	NA	NA	NA	NA	NA	NA
PI 541524	CPYR_2437.001	Pyrus communis	Delbard Premiere	1955	CPYR_12.002	Akca	CPYR_459.001	Precoce de Trevoux	Bassil & Postman, 2010	NEW: Believed ﻿Akca x Dr. Jules Guyot, but only first parent confirmed
PI 654914	CPYR_2438.001	Pyrus communis	Romania 14/125 F2-3-131	NA	NA	NA	CPYR_441.001	Passe Crassane	NCGR	NEW
PI 654915	CPYR_2439.001	Pyrus communis	Romania 4/115 F2-8-194	NA	NA	NA	CPYR_441.001	Passe Crassane	NCGR	NEW
PI 264194	CPYR_244.004	Pyrus communis	Gieser Wildeman	NA	NA	NA	NA	NA	Morgan, 2015	NA
PI 665776	CPYR_2440.002	Pyrus communis	Napoca	released 1969	CPYR_192.001	Docteur Jules Guyot (=Limonera)	NA	NA	NCGR	confirmed
PI 654916	CPYR_2441.001	Pyrus hybrid	Romania 3/35 FE-12-139	NA	NA	NA	CPYR_441.001	Passe Crassane	NCGR	NEW
PI 665782	CPYR_2442.001	Pyrus communis	Pyvert [Vert] (Genetic Dwarf)	NA	CPYR_148.001	Doyenne du Comice	NA	NA	NCGR	confirmed
PI 654917	CPYR_2445.001	Pyrus ussuriensis	Chinfon Li	NA	CPYR_1177.001	Tsu Li	CPYR_2638.002	Tsu Li 1	NCGR	NEW: Tsu Li/Tse Li very old variety from Shantung Province of Northeastern China. Tsu Li 1 and Chinfon Li uncertain
PI 665785	CPYR_2448.001	Pyrus pashia	P. pashia - Nepal	NA	NA	NA	NA	NA	NA	NA
PI 654920	CPYR_2449.001	Pyrus communis	Colmar d'Ete	NA	NA	NA	NA	NA	Hedrick et al., 1921; Morgan, 2015	NA
PI 654921	CPYR_2450.001	Pyrus communis	Magnate	NA	NA	NA	NA	NA	Hedrick et al., 1921; Morgan, 2015	NA
PI 617571	CPYR_2454.001	Pyrus communis	Enie	selected 1930	CPYR_433.002	Orel No. 15	CPYR_1631.001	Clapp Favorite	NCGR	NEW: Believed Zuckerbirne (= Tamiioasa Robert) x Clapp Favorite
PI 617572	CPYR_2455.001	Pyrus communis	Miney	selected 1930	CPYR_433.002	Orel No. 15	CPYR_1631.001	Clapp Favorite	NCGR	NEW: Believed Zuckerbirne (= Tamiioasa Robert) x Clapp Favorite, but here only Clapp Favorite confirmed
PI 617573	CPYR_2456.001	Pyrus communis	Carrick	1934	CPYR_519.001	Seckel	CPYR_239.002	Garber	Morgan, 2015	confirmed
PI 541195	CPYR_246.001	Pyrus communis	Gin	NA	NA	NA	NA	NA	Morgan, 2015	NA
PI 541310	CPYR_249.001	Pyrus communis	Glou Morceau	1750	NA	NA	CPYR_78.002	Beurré Gris	Hedrick et al., 1921; Morgan, 2015	NEW: Uncertain direction of this duo. Beurré Gris (= Beurré Brown) origin confused, might be as early as 1628 or 1867, France; G. Morceau raised in 1759 and intorduced to France in 1806
PI 541119	CPYR_25.001	Pyrus communis	Aurora	selected 1950	CPYR_381.005	Marguerite Marillat	CPYR_38.001_07	Bartlett	NCGR	confirmed
PI 541712	CPYR_250.003	Pyrus hybrid	Good Christian	described 1957	CPYR_38.001_07	Bartlett	CPYR_63.001	Anjou	NCGR	NEW
PI 617579	CPYR_2500.001	Pyrus communis	Mission La Purisima Pear 1-A	NA	NA	NA	NA	NA	NCGR	NA
PI 617580	CPYR_2501.001	Pyrus communis	Mission La Purisima Pear 2-A	NA	NA	NA	NA	NA	NCGR	NA
PI 617584	CPYR_2505.001	Pyrus communis	Joey's Red Flesh Pear (=Blutbirne?)	NA	NA	NA	NA	NA	Hedrick et al., 1921	NA
PI 617585	CPYR_2506.002	Pyrus communis	Premices de Maria Lesueur	NA	NA	NA	NA	NA	NCGR	NA
PI 617587	CPYR_2510.002	Pyrus communis	Blanquilla (=Spadona)	NA	NA	NA	NA	NA	NCGR	NA
PI 617589	CPYR_2513.004	Pyrus regelii	P. regelii KAZ 93-41-09 - Kazakhstan	NA	NA	NA	NA	NA	NA	NA
PI 617593	CPYR_2517.001	Pyrus communis	Rombough Mite Resistant Pear #1	NA	CPYR_431.001	Old Home	CPYR_38.001_07	Bartlett	Postman et al., 2013; NCGR	confirmed (= OHxF 261)
PI 617594	CPYR_2518.001	Pyrus communis	Potomac	1961	Moonglow	Moonglow	CPYR_63.001	Anjou	NCGR	confirmed
PI 617595	CPYR_2519.001	Pyrus communis	US 309	NA	CPYR_489.002	Roi Charles de Wurttemberg	US-Michigan437	US-Michigan 437	NCGR	confirmed
PI 541196	CPYR_252.001	Pyrus communis	Gorham	1910	CPYR_38.001_07	Bartlett	CPYR_305.005	Josephine de Malines	Morgan, 2015	confirmed
PI 617596	CPYR_2520.001	Pyrus korshinskyi	P. korshinskyi 94009 - Kyrgyzstan	NA	NA	NA	NA	NA	NA	NA
PI 617597	CPYR_2521.001	Pyrus korshinskyi	P. korshinskyi 94010 - Kyrgyzstan	NA	NA	NA	NA	NA	NA	NA
PI 617598	CPYR_2522.004	Pyrus korshinskyi	P. korshinskyi 94011 - Kyrgyzstan	collected 1994	NA	NA	CPYR_2724.001	Comtesse de Paris	NCGR	NEW: FS with seedlings from same seed lot
PI 617598	CPYR_2522.003	Pyrus korshinskyi	P. korshinskyi 94011 - Kyrgyzstan	collected 1994	NA	NA	CPYR_2724.001	Comtesse de Paris	NCGR	NEW: FS with seedlings from same seed lot
PI 617598	CPYR_2522.005	Pyrus korshinskyi	P. korshinskyi 94011 - Kyrgyzstan	collected 1994	NA	NA	NA	NA	NCGR	NA
PI 617598	CPYR_2522.002	Pyrus korshinskyi	P. korshinskyi 94011 - Kyrgyzstan	collected 1994	NA	NA	CPYR_2724.001	Comtesse de Paris	NCGR	NEW: FS with seedlings from same seed lot
PI 617598	CPYR_2522.009	Pyrus korshinskyi	P. korshinskyi 94011 - Kyrgyzstan	collected 1994	NA	NA	NA	NA	NCGR	NA
PI 617601	CPYR_2525.001	Pyrus hybrid	Tennessee	NA	NA	NA	CPYR_592.001	Vermont Beauty	NCGR	NEW
PI 617602	CPYR_2526.001	Pyrus hybrid	Biscamp	NA	NA	NA	NA	NA	NCGR	NA
PI 617607	CPYR_2532.001	Pyrus communis	Illinois 80E-1 (Illinois selection from Russian seed)	1920s	CPYR_38.001_07	Bartlett	CPYR_63.001	Anjou	NCGR	NEW
PI 665740	CPYR_2533.001	Pyrus communis	Concorde	1968	CPYR_148.001	Doyenne du Comice	CPYR_156.001	Conference	Morgan, 2015	confirmed
PI 617608	CPYR_2534.001	Pyrus communis	IV 12	NA	CPYR_2548.001	Junsko Zlato	CPYR_1646.001	Coscia (Precoce?)	NCGR	NEW
PI 617609	CPYR_2535.001	Pyrus hybrid	Lida	NA	NA	NA	NA	NA	NCGR	NA
PI 617610	CPYR_2536.001	Pyrus communis	Orlovskaja Zolotistaja	NA	CPYR_2724.001	Comtesse de Paris	CPYR_2706.001	Bessemianka	NCGR	NEW
PI 617612	CPYR_2538.001	Pyrus communis	Oranzhevaja	NA	CPYR_1631.001	Clapp Favorite	CPYR_1646.001	Coscia (Precoce?)	NCGR	NEW
PI 324128	CPYR_254.002	Pyrus communis	Grata	introdcued 1956	CPYR_59.002	Beurré Clairgeau	CPYR_38.001_07	Bartlett	NCGR	confirmed
PI 617616	CPYR_2542.001	Pyrus communis	Moknine No. 4 - Tunisia	NA	NA	NA	NA	NA	NCGR	NA
PI 617617	CPYR_2543.001	Pyrus communis	Arbi	NA	NA	NA	NA	NA	NCGR	NA
PI 637988	CPYR_2545.001	Pyrus ussuriensis	Liu Yue Xian [Liu Yue Shian]	NA	NA	NA	CPYR_268.001	Hang Pa Li	NCGR	NEW: Not sure which one is parent and which one offspring
PI 617620	CPYR_2548.001	Pyrus communis	Junsko Zlato	1963	CPYR_459.001	Precoce de Trevoux	CPYR_184.002	Doyenne de Juillet	NCGR	confirmed
PI 541713	CPYR_255.001	Pyrus hybrid	Greisa No.1 (=Douglas?)	NA	CPYR_1166.001	Kieffer	CPYR_286.004	Howell - Sport	NCGR	NEW: Greisa not the same as Douglas, but they are HS, probably both Kieffer o.p. Second parents inferred as Howell
PI 617623	CPYR_2551.004	Pyrus hybrid	P. hybrid KAZ 95-05-04 - Kazakhstan	NA	NA	NA	NA	NA	NA	NA
PI 617623	CPYR_2551.006	Pyrus hybrid	P. communis hybrid KAZ 95-05-04 - Kazakhstan	NA	NA	NA	NA	NA	NA	NA
PI 617624	CPYR_2552.002	Pyrus hybrid	P. hybrid KAZ 95-10-08L - Kazakhstan	NA	NA	NA	NA	NA	NA	NA
PI 617625	CPYR_2553.001	Pyrus hybrid	P. hybrid KAZ 95-10-11F - Kazakhstan	NA	NA	NA	NA	NA	NA	NA
PI 617629	CPYR_2558.001	Pyrus hybrid	John	selected 1958	CPYR_38.001_07	Bartlett	NA	NA	NCGR	NEW: Believed Pyrus ussuriensis x Aspa, but Aspa is not held at the repository
PI 617631	CPYR_2561.001	Pyrus hybrid	Peter	selected 1958	CPYR_38.001_07	Bartlett	NA	NA	Morgan, 2015	NEW: Believed Pyrus ussuriensis x Aspa, but Aspa is not held at NCGR
PI 617632	CPYR_2562.001	Pyrus hybrid	Petrovski	NA	NA	NA	NA	NA	NCGR	NA
PI 617633	CPYR_2563.001	Pyrus hybrid	Simon	selected 1958	CPYR_38.001_07	Bartlett	NA	NA	NCGR	NEW: Believed Pyrus ussuriensis x Aspa, but Aspa is not held at NCGR
PI 617634	CPYR_2564.001	Pyrus communis	Tait Dropmore	introduced 1928	CPYR_286.004	Howell - Sport	CPYR_38.001_07	Bartlett	NCGR	NEW: Tait Dropmore believed Patten o.p., here not confirmed
PI 617635	CPYR_2565.001	Pyrus hybrid	Thomas	selected 1959	NA	NA	CPYR_38.001_07	Bartlett	NCGR	confirmed: Reported as Pyrus ussuriensis x Bartlett
PI 617637	CPYR_2567.002	Pyrus communis	Souvenir du Congress	1852	NA	NA	CPYR_38.001_07	Bartlett	Hedrick et al., 1921; Morgan, 2015	NEW: It was believed Duchesse d'Angouleme x Bartlett, here not confirmed
PI 617638	CPYR_2569.002	Pyrus communis	La France	1864	NA	NA	CPYR_249.001	Glou Morceau	Hedrick et al., 1921	NEW
PI 617640	CPYR_2571.001	Pyrus communis	Soldat Laboureur	1817-20	CPYR_393.003	Messire Jean	NA	NA	Hedrick et al., 1921; Morgan, 2015	NEW: Messire Jean 1600 to early 1800's, Soldat Laboureur 1817-20
PI 617641	CPYR_2572.001	Pyrus communis	Brignoles	NA	NA	NA	NA	NA	NCGR	NA
PI 617642	CPYR_2573.001	Pyrus hybrid	Turnbull (Turnbull Giant)	released 1981	NA	NA	CPYR_1166.001	Kieffer	NCGR	NEW
PI 617643	CPYR_2574.001	Pyrus hybrid	Tarusa Crimson (=Tamared)	NA	CPYR_38.001_07	Bartlett	NA	NA	NCGR	NEW
PI 617644	CPYR_2575.001	Pyrus communis	Poire d'Anis	NA	CPYR_38.001_07	Bartlett	NA	NA	NCGR	NEW
PI 617646	CPYR_2577.001	Pyrus calleryana	Bradford (P. calleryana)	NA	NA	NA	NA	NA	NCGR	NA
PI 641276	CPYR_2582.004	Pyrus sp.	Dardhe-e-kuge o.p. - Albania market	NA	NA	NA	NA	NA	NCGR	NA
PI 641276	CPYR_2582.001	Pyrus sp.	Dardhe-e-kuge o.p. - Albania market	NA	NA	NA	NA	NA	NCGR	NA
PI 641279	CPYR_2587.001	Pyrus regelii	P. regelii - Boraldy River Forest, Kazakhstan	NA	NA	NA	NA	NA	NA	NA
PI 641279	CPYR_2587.002	Pyrus regelii	P. regelii - Boraldy River Forest, Kazakhstan	NA	NA	NA	NA	NA	NA	NA
PI 541988	CPYR_259.003	Pyrus ussuriensis	Guar Li Sdlg No. 2	NA	NA	NA	CPYR_27.002	Ba Li Xiang [Ba Li Hsiang]	NCGR	NEW: Ba Li Xiang old pear local selection from Liaoning and Hebei Provinces; Guar Li Sdlg collected by Reimer in 1919
PI 617652	CPYR_2593.001	Pyrus communis	Untoasa de Geoagiu	released 1973	CPYR_38.001_07	Bartlett	CPYR_2031.001	Olivier de Serres	NCGR	NEW: Believed Josephine de Malines x Olivier de Serres, but here only Olivier de Serres confirmed
PI 637990	CPYR_2595.002	Pyrus communis	Endicott Pear	NA	NA	NA	NA	NA	Hedrick et al., 1921	NA
PI 641280	CPYR_2597.001	Pyrus sp.	Ledbetter Pear	NA	NA	NA	NA	NA	NCGR	NA
PI 617654	CPYR_2598.002	Pyrus communis	Pyrodwarf - rootstock clone (IPR expires 2017)	NA	CPYR_431.001	Old Home	CPYR_156.001	Conference	Jacob, 1998	NEW: Pyrodwarf reported as Old Home x Louise Bonne Jersey, here only Old Home confirmed
PI 541120	CPYR_26.001	Pyrus communis	Ayer	1880	CPYR_602.004	White Doyenne	CPYR_38.001_07	Bartlett	Hedrick et al., 1921	NEW
PI 617657	CPYR_2602.001	Pyrus hybrid	Higdon	NA	NA	NA	CPYR_2732.001	Le Conte	NCGR	NEW
PI 617661	CPYR_2606.001	Pyrus hybrid	Thanksgiving	NA	NA	NA	CPYR_1166.001	Kieffer	NCGR	NEW
PI 617663	CPYR_2608.001	Pyrus pyrifolia	Shin Li	released 1988	CPYR_317.003	Kikusui	CPYR_1177.001	Tsu Li	NCGR	confirmed
PI 617664	CPYR_2609.001	Pyrus pyrifolia	Henderson	NA	NA	NA	CPYR_533.001	Sivaganga Estate	NCGR	NEW
PI 541200	CPYR_261.001	Pyrus communis	H 6831/1.12 (=HW 605?)	1968	CPYR_519.001	Seckel	CPYR_1111.004	Mac	NCGR	NEW: It was believed Seckel x Bartlett, here only Seckel confirmed
PI 617666	CPYR_2611.001	Pyrus hybrid	Florida 58-45	NA	CPYR_281.001	Hood	CPYR_2525.001	Tennessee	NCGR	NEW
PI 617673	CPYR_2618.001	Pyrus pyrifolia	Bou Tsu Li	NA	NA	NA	NA	NA	NCGR	NA
PI 617674	CPYR_2619.001	Pyrus hybrid	Ooharabeni	NA	NA	NA	CPYR_38.001_07	Bartlett	NCGR	confirmed: Thought to be derived from 'Okusankichi' x 'Max Red Bartlett' but DNA microsatelite analysis in Japan suggests that 'Okusankichi' is not a parent
PI 617675	CPYR_2620.001	Pyrus communis	Beurré Six	1845	CPYR_38.001_07	Bartlett	CPYR_63.001	Anjou	Hedrick et al., 1921; Morgan, 2015	NEW
PI 617676	CPYR_2621.001	Pyrus communis	Osenniaja Jakovleva	NA	CPYR_2724.001	Comtesse de Paris	CPYR_2706.001	Bessemianka	NCGR	NEW
PI 617677	CPYR_2622.001	Pyrus communis	Yungen	NA	CPYR_148.001	Doyenne du Comice	CPYR_38.001_07	Bartlett	NCGR	confirmed: Paragon (= Yungen) = Comice x Max Red Bartlett
PI 617678	CPYR_2623.001	Pyrus pyrifolia	Dan Bae (Olympic)	released 1969	CPYR_136.004	Chojuro	NA	NA	NCGR	confirmed
PI 657915	CPYR_2624.001	Pyrus communis	Elliot	1977-8	NA	NA	CPYR_592.001	Vermont Beauty	Morgan, 2015	confirmed
PI 657916	CPYR_2625.001	Pyrus pyrifolia	Daisui Li	released 1988	CPYR_317.003	Kikusui	CPYR_1177.001	Tsu Li	NCGR	confirmed
PI 693207	CPYR_2627.002	Pyrus communis	Timpurii de Dimbovita	NA	CPYR_23.002	Arganche	CPYR_1631.001	Clapp Favorite	NCGR	NEW
PI 691226	CPYR_2628.003	Pyrus communis	Para Toto R-091	NA	CPYR_393.003	Messire Jean	NA	NA	NCGR	NEW
PI 691227	CPYR_2629.003	Pyrus communis	Prosemica	NA	NA	NA	NA	NA	NA	NA
PI 665777	CPYR_2631.002	Pyrus communis	Sidi Bou Ali No 3 - Tunisia	NA	NA	NA	NA	NA	NCGR	NA
PI 665781	CPYR_2638.002	Pyrus ×bretschneideri	Tsu Li 1	NA	NA	NA	NA	NA	NCGR	NA
PI 688106	CPYR_2639.003	Pyrus pyrifolia	Yang-Nai-Shian	NA	NA	NA	CPYR_1617.002	Xiangshui Li [Hsiang Sui-Li]	NCGR	NEW: Sion Szu Mi identical to Ta-Shian-Sui Li (= Dangshansuli?), Xiangshui Li [Hsiang Sui-Li] and Szumi. Yang-Nai-Shian cv developed in Liaoning China. Not sure which one is parent and which one offspring
PI 541202	CPYR_264.002	Pyrus communis	HW 601 (Harrow, Ontario)	introduced 1972	CPYR_1062.001	Beierschmitt	CPYR_547.001	Maxine	NCGR	NEW: Believed Bartlett x Maxine, but here only Maxine confirmed
PI 654923	CPYR_2642.002	Pyrus pyrifolia	Nepal 5053	NA	NA	NA	NA	NA	NCGR	NA
PI 665788	CPYR_2646.003	Pyrus ×bretschneideri	Zao Su Li	NA	NA	NA	NA	NA	NA	NA
PI 693202	CPYR_2649.002	Pyrus communis	Summer Beurré De Arenberg	1860	CPYR_64.003	Beurré d'Arenberg	CPYR_38.001_07	Bartlett	Hedrick et al., 1921; Morgan, 2015	NEW
PI 541203	CPYR_265.001	Pyrus communis	Harvest Queen (HW 602)	selected 1972 in Ontario- Canada	CPYR_38.001_07	Bartlett	NA	NA	Morgan, 2015	confirmed Bartlett parentage
PI 654925	CPYR_2650.004	Pyrus communis	Marie Louise D'uccle	1821	NA	NA	CPYR_249.001	Glou Morceau	Hedrick et al., 1921; Morgan, 2015	NEW: believed Marie Louise seedling, here not confirmed
PI 665789	CPYR_2651.002	Pyrus pyrifolia	Atago	1915	NA	NA	CPYR_136.004	Chojuro	Sawamura et al., 2008	confirmed
PI 654926	CPYR_2654.002	Pyrus ×sinkiangensis	Joghoso I	NA	NA	NA	NA	NA	NCGR	NA
PI 654927	CPYR_2655.002	Pyrus communis	Gompapa	NA	NA	NA	NA	NA	NCGR	NA
PI 693210	CPYR_2659.003	Pyrus hybrid	Sur Tangoo (red pear)	NA	CPYR_38.001_07	Bartlett	CPYR_63.001	Anjou	NCGR	NEW
PI 665793	CPYR_2660.002	Pyrus hybrid	Spin Tangoo (white pear)	NA	NA	NA	NA	NA	NCGR	NA
PI 691231	CPYR_2661.002	Pyrus sp.	Bap Tangoo	NA	NA	NA	NA	NA	NA	NA
PI 688075	CPYR_2664.004	Pyrus sp.	Shinkwalay	NA	NA	NA	NA	NA	NA	NA
PI 693199	CPYR_2667.003	Pyrus pashia	Kharnak III (donkey pear)	NA	NA	NA	CPYR_2189.001	Aristocrat (P. calleryana)	NCGR	NEW: Aristocrat seedling selection from seedlot that F. Meyer collected in China. Kharnak III scions collected from cultivated tree by M. Thompson and D. Brenner on 25 November- 1988 in Pakistan
PI 693208	CPYR_2671.002	Pyrus communis	Frashishi	NA	NA	NA	NA	NA	NA	NA
PI 688108	CPYR_2672.002	Pyrus pashia hybrid	Tan Chi II (little pear) - Pakistan	NA	NA	NA	NA	NA	NCGR	NA
PI 655572	CPYR_2673.002	Pyrus pashia hybrid	Tangay (P. pashia hybrid) - Pakistan	NA	NA	NA	NA	NA	NA	NA
PI 691232	CPYR_2675.003	Pyrus hybrid	Khapa - large fruited P. pashia type	NA	NA	NA	NA	NA	NA	NA
PI 691233	CPYR_2677.002	Pyrus communis	HL-III-2/79	NA	CPYR_1165.001	Bosc - OP-5	CPYR_148.001	Doyenne du Comice	NCGR	NEW
PI 654930	CPYR_2678.003	Pyrus communis	Vila	NA	CPYR_1165.001	Bosc - OP-5	CPYR_59.002	Beurré Clairgeau	NCGR	NEW
PI 665795	CPYR_2679.002	Pyrus communis	TE-1839 (Czech Republic)	NA	CPYR_1631.001	Clapp Favorite	NA	NA	NCGR	NEW: Believed Clapp Favorite x Bosc, but here only Clapp Faovrite confirmed
PI 315064	CPYR_268.001	Pyrus ussuriensis	Hang Pa Li	NA	NA	NA	NA	NA	NCGR	NA
PI 688090	CPYR_2681.002	Pyrus ×bretschneideri	Xuehuali (Snowflake)	NA	NA	NA	NA	NA	NA	NA
PI 688092	CPYR_2683.002	Pyrus salicifolia	P. salicifolia A-53-14 (Russia)	donated 1991	NA	NA	CPYR_2875.002	B II-3 = 34 = 36 P. salicifolia	NCGR	NEW: Not sure of direction of this duo, but A-53-14 x Glou Morceau not = B II-3
PI 688157	CPYR_2685.003	Pyrus communis	Camusina di Bonarcado	NA	NA	NA	NA	NA	NA	NA
PI 688078	CPYR_2686.003	Pyrus communis	Camusina di Cagliari	NA	NA	NA	NA	NA	NA	NA
PI 654933	CPYR_2689.002	Pyrus communis	De Su Duca	NA	NA	NA	CPYR_51.002	Bergamotte d'Automne	NCGR	NEW
PI 541989	CPYR_269.003	Pyrus ussuriensis	Hau Kai	released 1918	CPYR_1157.002	Tzu Ma Li	CPYR_3000.001	Ba Li Shian	NCGR	NEW
PI 693197	CPYR_2691.002	Pyrus communis	Mela di Laconi	NA	NA	NA	NA	NA	NA	NA
PI 665800	CPYR_2693.003	Pyrus communis	Etrusca	1971	CPYR_2286.001	Coscia (Tardive?)	CPYR_1526.002	Ilinka	NCGR	NEW: Coscia Tardive is actually Coscia. Etrusca though Coscia x Gentile
PI 654934	CPYR_2694.002	Pyrus communis	Tosca	NA	CPYR_2286.001	Coscia (Tardive?)	CPYR_38.001_07	Bartlett	NCGR	confirmed: Coscia Tardive is actually Coscia
PI 654935	CPYR_2698.004	Pyrus communis	Zimska Kajuska	NA	NA	NA	NA	NA	NCGR	NA
PI 617679	CPYR_2699.003	Pyrus communis	BU 2/33 - Pyro II (P. communis rootstock clone)	NA	CPYR_431.001	Old Home	CPYR_249.001	Glou Morceau	NCGR	NEW: Reported as Old Home x Louise Bonne Jersey, but here only Olf Home confirmed
PI 541985	CPYR_27.002	Pyrus ussuriensis	Ba Li Xiang [Ba Li Hsiang]	NA	NA	NA	NA	NA	NCGR	NA
PI 541897	CPYR_270.001	Pyrus pyrifolia	Hawaii	NA	NA	NA	NA	NA	Hedrick et al., 1921	NA
PI 688093	CPYR_2700.001	Pyrus communis	OH-11 (Pyriam) Rootstock Selection	NA	CPYR_431.001	Old Home	NA	NA	Simard & Michelesi, 2002	confirmed: Old Home seedling selection. Second parent remains unknown
PI 688112	CPYR_2701.001	Pyrus communis	96.FI.13 (P. communis rootstock clone)	1979	CPYR_77.002	Beurré Giffard	NA	NA	NCGR	NEW: It was believed 'Mora' x 'Volpina' (open pollinated), not confimed
PI 688187	CPYR_2702.001	Pyrus communis	96.FI.14 (P. communis rootstock clone)	NA	NA	NA	NA	NA	NA	NA
PI 617680	CPYR_2703.002	Pyrus communis	QR 708-2 (P. communis rootstock clone)	NA	CPYR_102.001	BP-2 (Bien Donne 2)	CPYR_431.001	Old Home	NCGR	NEW: Thought BP1 x Old Home, but here only Old Home confirmed
PI 688125	CPYR_2704.002	Pyrus communis	QR 708-12 (P. communis rootstock clone)	NA	CPYR_102.001	BP-2 (Bien Donne 2)	CPYR_431.001	Old Home	NCGR	NEW: Believed BP1 x Old Home, but here only Old Home confirmed
-	CPYR_2705.001	Pyrus communis	QR 708-36 (P. communis rootstock clone)	NA	CPYR_102.001	BP-2 (Bien Donne 2)	CPYR_431.001	Old Home	NCGR	NEW: Thought BP1 x Old Home, here only OldHome confirmed
PI 654936	CPYR_2706.001	Pyrus communis	Bessemianka	NA	NA	NA	NA	NA	Hedrick et al., 1921	NA
PI 637991	CPYR_2709.001	Pyrus sp.	Jilin Market 99015	1999	CPYR_2638.002	Tsu Li 1	CPYR_1678.001	Ya Li	NCGR	NEW
PI 255612	CPYR_271.008	Pyrus communis	Hebe	NA	NA	NA	NA	NA	Hedrick et al., 1921	NA
PI 617683	CPYR_2711.001	Pyrus communis	Mission San Juan Bautista Pear	NA	NA	NA	NA	NA	NCGR	NA
PI 617685	CPYR_2713.001	Pyrus communis	I-5 Milepost 238	NA	NA	NA	NA	NA	NCGR	NA
PI 617686	CPYR_2714.002	Pyrus communis	Hager Grove Pioneer Pear	NA	NA	NA	CPYR_602.004	White Doyenne	NCGR	NEW
PI 641281	CPYR_2716.001	Pyrus syriaca	P. syriaca - Israel (seedling)	NA	NA	NA	NA	NA	NA	NA
PI 654937	CPYR_2718.001	Pyrus pashia hybrid	Nepal 5049	NA	NA	NA	NA	NA	NCGR	NA
PI 654938	CPYR_2719.001	Pyrus pyrifolia	Nepal 5137	NA	NA	NA	CPYR_2642.002	Nepal 5053	NCGR	NEW: This should be the direction of this duo, since Nepal 5053 is FS with Sivaganga Estate, and this one has a 2nd degree relationship with Nepal 5137
PI 691230	CPYR_2721.002	Pyrus pyrifolia	Shoghori 1	NA	NA	NA	NA	NA	NA	NA
PI 688091	CPYR_2723.001	Pyrus ×sinkiangensis	Ho Mon	NA	CPYR_156.001	Conference	CPYR_1113.001	Madame Verte	NCGR	NEW: Ho Mon donated to NCGR as Chinese landrace
PI 641282	CPYR_2724.001	Pyrus communis	Comtesse de Paris	first reported 1847	CPYR_602.004	White Doyenne	NA	NA	Morgan, 2015	NEW
PI 688147	CPYR_2726.001	Pyrus ussuriensis	P. ussuriensis HVSC-053 - Khabarovsk, Russia	NA	NA	NA	NA	NA	NA	NA
PI 637995	CPYR_2730.001	Pyrus ussuriensis	P. ussuriensis 'Primorski Sour' - Khabarovsk sdlg. 1	2001	NA	NA	CPYR_573.002	Tioma	NCGR	NEW
PI 637997	CPYR_2732.001	Pyrus hybrid	Le Conte	pre 1850	NA	NA	CPYR_70.003	Beurré de Saint Nicolas	Hedrick et al., 1921	NEW: Not sure about direction of this duo. Le Conte was believed hybrid between Chinese Sand pear and some European pear orginiated in America before 1850
PI 641283	CPYR_2738.001	Pyrus communis	Philip	selected 1958	CPYR_38.001_07	Bartlett	NA	NA	NCGR	NEW: Believed Pyrus ussuriensis x Aspa, but Aspa is not held at the repository
PI 665801	CPYR_2740.001	Pyrus communis	N 217-27.12 (rootstock selection)	NA	NA	NA	CPYR_578.001	Tonkowietka	NCGR	NEW
PI 654940	CPYR_2741.001	Pyrus communis	Sarteau Rogue	NA	NA	NA	CPYR_162.001	Vicar of Winkfield	NCGR	NEW (typo for Rouge): this might be the right direction of this duo, since B. Automne x Sarteau Rouge not = Vikar of Winkfield
PI 665806	CPYR_2742.001	Pyrus communis	India pear selection	NA	NA	NA	NA	NA	NCGR	NA
PI 693212	CPYR_2744.001	Pyrus communis	India NIC 19388	NA	CPYR_38.001_07	Bartlett	CPYR_63.001	Anjou	NCGR	NEW
PI 665807	CPYR_2748.001	Pyrus hybrid	India NIC 20814	NA	NA	NA	CPYR_533.001	Sivaganga Estate	NCGR	NEW: Accessions from India, not sure which one came first
PI 654941	CPYR_2752.001	Pyrus hybrid	SIM 103-1 - Canada	NA	CPYR_38.001_07	Bartlett	CPYR_63.001	Anjou	NCGR	NEW
PI 654942	CPYR_2753.002	Pyrus hybrid	SIM 117-11 (Alberta, Canada)	NA	CPYR_2273.001	Golden Spice	NA	NA	NCGR	NEW
PI 654943	CPYR_2754.001	Pyrus pyrifolia	Hakko	1953	CPYR_622.001	Yakumo	CPYR_322.001	Kosui	Sawamura et al., 2008; Morgan, 2015	confirmed
PI 665775	CPYR_2755.001	Pyrus communis	Romania 14/109 F2- F-2	NA	NA	NA	CPYR_441.001	Passe Crassane	NCGR	NEW
PI 654944	CPYR_2756.001	Pyrus pyrifolia	Fu-Wu-Shian	NA	NA	NA	NA	NA	NCGR	NA
PI 654945	CPYR_2757.001	Pyrus communis	Bellissime d'Hiver	NA	NA	NA	NA	NA	Hedrick et al., 1921; Morgan, 2015	NA
PI 654946	CPYR_2758.001	Pyrus pyrifolia	Shoghori II	NA	NA	NA	NA	NA	NCGR	NA
PI 541205	CPYR_276.001	Pyrus communis	Hendre Huffcap	NA	NA	NA	NA	NA	Morgan, 2015	NA
PI 688089	CPYR_2760.001	Pyrus salicifolia	P. salicifolia N1 - Russia	NA	NA	NA	CPYR_602.004	White Doyenne	NCGR	NEW
PI 654947	CPYR_2761.001	Pyrus sp.	P. salicifolia N65 - Russia	NA	NA	NA	NA	NA	NA	NA
PI 688096	CPYR_2764.001	Pyrus pyrifolia	Hong Yiungli	NA	NA	NA	NA	NA	NCGR	NA
PI 654949	CPYR_2765.001	Pyrus ×sinkiangensis	Lantai Jululi	NA	CPYR_38.001_07	Bartlett	CPYR_1165.001	Bosc - OP-5	NCGR	NEW
PI 654950	CPYR_2768.001	Pyrus hybrid	B II-3-25-27 (Bartlett x P. salicifolia) - Russia	NA	NA	NA	CPYR_249.001	Glou Morceau	NCGR	NEW: Not related to Bartlett and any salicifolia in the collection
PI 654951	CPYR_2769.001	Pyrus hybrid	Nart	NA	NA	NA	CPYR_1166.001	Kieffer	NCGR	NEW
PI 541206	CPYR_277.002	Pyrus communis	Henri Desportes	first fruited 1862	CPYR_249.001	Glou Morceau	CPYR_17.001	Duchesse d'Angouleme	Hedrick et al., 1921	NEW
PI 654961	CPYR_2770.001	Pyrus sp.	Tara Mrut [William Feldman]	NA	NA	NA	NA	NA	NCGR	NA
PI 654952	CPYR_2771.001	Pyrus sp.	Gorelde	NA	NA	NA	NA	NA	NA	NA
PI 665803	CPYR_2773.001	Pyrus (betulifolia?) hybrid	Vanovskaya 84-2 - Turkmenistan	NA	CPYR_38.001_07	Bartlett	NA	NA	NCGR	NEW
PI 665805	CPYR_2774.001	Pyrus sp.	Birleshik 84-2 - Turkmenistan	NA	NA	NA	NA	NA	NCGR	NA
PI 654954	CPYR_2775.001	Pyrus sp.	Saarli 86-1 - Turkmenistan	NA	NA	NA	NA	NA	NCGR	NA
PI 654955	CPYR_2776.001	Pyrus communis	Karadede 86-3 - Turkmenistan	NA	NA	NA	NA	NA	NCGR	NA
PI 654956	CPYR_2778.001	Pyrus hybrid	Domestic pear hybrid from Orel, Russia	NA	NA	NA	NA	NA	NCGR	NA
PI 654957	CPYR_2779.001	Pyrus communis	Severyanka Kzasroshokaya	NA	CPYR_38.001_07	Bartlett	CPYR_63.001	Anjou	NCGR	NEW
PI 665812	CPYR_2782.001	Pyrus communis	Moorcroft	NA	NA	NA	NA	NA	Hedrick et al., 1921; Morgan, 2015	NA
PI 688158	CPYR_2783.001	Pyrus communis	Beth	1938	CPYR_558.002	Beurré Superfin	CPYR_38.001_07	Bartlett	Morgan, 2015	confirmed
PI 654958	CPYR_2784.001	Pyrus ussuriensis	Uzhi Li	NA	NA	NA	NA	NA	NCGR	NA
PI 654960	CPYR_2786.001	Pyrus ×bretschneideri	Syan Li	NA	CPYR_1177.001	Tsu Li	NA	NA	NCGR	NEW
PI 541207	CPYR_279.002	Pyrus communis	Highland	1944	CPYR_38.001_07	Bartlett	CPYR_148.001	Doyenne du Comice	Morgan, 2015	confirmed
PI 657917	CPYR_2790.002	Pyrus syriaca	P. syriaca ARM-01-361 - Armenia	NA	NA	NA	NA	NA	NA	NA
PI 638000	CPYR_2797.001	Pyrus salicifolia	P. salicifolia ARM-02-067 - Armenia, Arpa Gorge	NA	NA	NA	NA	NA	NA	NA
PI 638000	CPYR_2797.003	Pyrus salicifolia	P. salicifolia ARM-02-067 - Armenia, Arpa Gorge	NA	NA	NA	NA	NA	NA	NA
PI 657918	CPYR_2798.001	Pyrus salicifolia	P. salicifolia ARM-02-076 - Armenia, Arpa Gorge	NA	NA	NA	NA	NA	NA	NA
PI 657918	CPYR_2798.003	Pyrus salicifolia	P. salicifolia ARM-02-076 - Armenia, Arpa Gorge	NA	NA	NA	NA	NA	NA	NA
PI 641285	CPYR_2799.001	Pyrus communis subsp. caucasica	P. communis ssp. caucasica ARM-02-167 - Armenia, Vanadzor	NA	NA	NA	NA	NA	NA	NA
PI 541320	CPYR_280.001	Pyrus communis	Honeysweet	1955	NA	NA	CPYR_519.001	Seckel	NCGR	confirmed
PI 665811	CPYR_2806.001	Pyrus communis	Green Horse	NA	NA	NA	NA	NA	Morgan, 2015	NA
PI 641289	CPYR_2809.001	Pyrus hybrid	Bosarge	NA	CPYR_428.001	Okusankichi	NA	NA	NCGR	NEW
PI 541311	CPYR_281.001	Pyrus hybrid	Hood	NA	CPYR_1166.001	Kieffer	NA	NA	NCGR	NEW
PI 638004	CPYR_2812.002	Pyrus communis subsp. caucasica	P. communis ssp. caucasica - Armenia, Spitaki-1	NA	NA	NA	NA	NA	NA	NA
PI 638004	CPYR_2812.001	Pyrus communis subsp. caucasica	P. communis ssp. caucasica - Armenia, Spitaki-1	NA	NA	NA	NA	NA	NA	NA
PI 638005	CPYR_2813.001	Pyrus communis subsp. caucasica	P. communis ssp. caucasica - Armenia, Spitaki-2	NA	NA	NA	NA	NA	NA	NA
PI 638006	CPYR_2814.001	Pyrus communis subsp. caucasica	P. communis ssp. caucasica - Armenia, Spitaki-3	NA	NA	NA	NA	NA	NA	NA
PI 638007	CPYR_2815.002	Pyrus communis subsp. caucasica	P. communis ssp. caucasica - Armenia, Spitaki-4	NA	NA	NA	NA	NA	NA	NA
PI 638008	CPYR_2816.006	Pyrus communis subsp. caucasica	P. communis ssp. caucasica - Armenia 37	NA	NA	NA	NA	NA	NA	NA
PI 638009	CPYR_2817.001	Pyrus elaeagrifolia	P. elaeagrifolia - Armenia 38	NA	NA	NA	NA	NA	NA	NA
PI 638011	CPYR_2819.001	Pyrus pyrifolia	Hamesi	NA	NA	NA	NA	NA	NA	NA
PI 638012	CPYR_2820.001	Pyrus pyrifolia	Choju (=Ichiban Nashi tm)	1954	NA	NA	CPYR_318.002	Kimizukawase	Sawamura et al., 2008	confirmed: Asahi x ﻿Kimitsukawase, but Asahi is not held at NCGR
PI 657919	CPYR_2821.001	Pyrus pyrifolia	Mishirasu	1887	NA	NA	CPYR_2724.001	Comtesse de Paris	NCGR	NEW
PI 665804	CPYR_2822.001	Pyrus sp.	Hyrs-Dere 84-1	NA	NA	NA	NA	NA	NCGR	NA
PI 638013	CPYR_2823.001	Pyrus communis	Bloodgood (=Julienne?)	known 1835	NA	NA	CPYR_602.004	White Doyenne	Hedrick et al., 1921	NEW
PI 638016	CPYR_2826.001	Pyrus communis	Yaquina (Payson)	NA	NA	NA	NA	NA	NCGR	NA
PI 638018	CPYR_2828.006	Pyrus betulifolia	P. betulifolia 'Du Li' - Shaanxi, China	NA	NA	NA	NA	NA	NA	NA
PI 638019	CPYR_2829.001	Pyrus communis	X-Ceptional	NA	NA	NA	NA	NA	NCGR	NA
PI 641292	CPYR_2835.003	Pyrus communis subsp. caucasica	P. communis ssp. caucasica GE-2004-037 - Georgia, Aregri Valley	NA	NA	NA	NA	NA	NA	NA
PI 641293	CPYR_2836.001	Pyrus communis subsp. caucasica	P. communis ssp. caucasica GE-2004-039 - Georgia, Shatili	NA	NA	NA	NA	NA	NA	NA
PI 641294	CPYR_2837.001	Pyrus communis subsp. caucasica	P. communis ssp. caucasica GE-2004-041 - Georgia, Shatili	NA	NA	NA	NA	NA	NA	NA
PI 641295	CPYR_2838.002	Pyrus communis subsp. caucasica	P. communis ssp. caucasica GE-2004-051 - Georgia, Barisakho	NA	NA	NA	NA	NA	NA	NA
PI 641296	CPYR_2839.003	Pyrus communis subsp. caucasica	P. communis ssp. caucasica GE-2004-068 - Georgia, Bakuriani	NA	NA	NA	NA	NA	NA	NA
PI 541208	CPYR_284.001	Pyrus communis	Hoskins	released 1954	CPYR_519.001	Seckel	CPYR_1166.001	Kieffer	NCGR	NEW: Thought Seckel x Lake Faulkner, but here only Seckel confirmed
PI 641297	CPYR_2840.003	Pyrus communis subsp. caucasica	P. communis ssp. caucasica GE-2004-075 - Georgia, Satere	NA	NA	NA	NA	NA	NA	NA
PI 641298	CPYR_2841.001	Pyrus communis subsp. caucasica	P. communis ssp. caucasica GE-2004-081 - Georgia, Bakuriani	NA	NA	NA	NA	NA	NA	NA
PI 641299	CPYR_2842.001	Pyrus communis subsp. caucasica	P. communis ssp. caucasica GE-2004-120 - Georgia, Nikortsminda	NA	NA	NA	NA	NA	NA	NA
PI 641300	CPYR_2844.003	Pyrus communis subsp. caucasica	P. communis ssp. caucasica GE-2004-131 - Georgia, Kharagauli	NA	NA	NA	NA	NA	NA	NA
PI 641301	CPYR_2845.001	Pyrus communis subsp. caucasica	P. communis ssp. caucasica GE-2004-136 - Georgia, Kharagauli	NA	NA	NA	NA	NA	NA	NA
PI 657920	CPYR_2846.004	Pyrus communis	Zebra Pear O.P. - Georgia	2004	NA	NA	CPYR_249.001	Glou Morceau	NCGR	NEW
PI 657920	CPYR_2846.005	Pyrus communis	Zebra Pear O.P. - Georgia	2004	NA	NA	CPYR_2628.003	Para Toto R-091	NCGR	NEW: Dircetion of this duo must be right because Messire Jean x Zebra Pear not = Para Toto
PI 657920	CPYR_2846.002	Pyrus communis	Zebra Pear O.P. - Georgia	2004	NA	NA	CPYR_249.001	Glou Morceau	NCGR	NEW
PI 657920	CPYR_2846.006	Pyrus communis	Zebra Pear O.P. - Georgia	2004	NA	NA	CPYR_249.001	Glou Morceau	NCGR	NEW
PI 657920	CPYR_2846.001	Pyrus communis	Zebra Pear O.P. - Georgia	2004	NA	NA	CPYR_1165.001	Bosc - OP-5	NCGR	NEW
PI 657921	CPYR_2849.001	Pyrus salicifolia	P. salicifolia GE-2004-141 - Akhaltsike, Georgia	NA	NA	NA	NA	NA	NA	NA
PI 657921	CPYR_2849.002	Pyrus salicifolia	P. salicifolia GE-2004-141 - Akhaltsike, Georgia	NA	NA	NA	NA	NA	NA	NA
PI 541209	CPYR_285.003	Pyrus communis	Hourdequin	NA	NA	NA	NA	NA	NCGR	NA
PI 654962	CPYR_2851.001	Pyrus communis	SIM 117-7 (Alberta, Canada)	NA	NA	NA	NA	NA	NCGR	NA
PI 665784	CPYR_2854.001	Pyrus ×bretschneideri	Shian-Sui Li	NA	NA	NA	CPYR_2724.001	Comtesse de Paris	NCGR	NEW: This is likely the orienttion of this duo, since Comtesse de Paris x Utrennaya Svezheste = Shian-Sui Li wrong
PI 665808	CPYR_2858.001	Pyrus communis	Pamyati Yakoleva	NA	NA	NA	CPYR_2031.001	Olivier de Serres	NCGR	NEW
PI 665773	CPYR_2859.001	Pyrus communis	Zutica	NA	NA	NA	NA	NA	NCGR	NA
PI 541210	CPYR_286.004	Pyrus communis	Howell - Sport	1829-30	NA	NA	CPYR_602.004	White Doyenne	Hedrick et al., 1921	NEW: Howell believed seedling of cultivar Jonah, which is not held at NCGR. Second parent inferred White Doyenne
PI 665774	CPYR_2860.001	Pyrus communis	Ilinjaca	NA	NA	NA	NA	NA	NCGR	NA
PI 665810	CPYR_2862.001	Pyrus communis	Jarve Seemik	NA	NA	NA	CPYR_490.004	King Sobieski	NCGR	NEW: Not sure which one came first. King Sobieski was released in Poland in 1908
PI 654963	CPYR_2864.001	Pyrus communis	Sampionka	1952	CPYR_462.001	President Drouard	CPYR_38.001_07	Bartlett	NCGR	confirmed
PI 691243	CPYR_2866.001	Pyrus communis subsp. caucasica	P. communis ssp. caucasica -Tavush Marz, Armenia	NA	NA	NA	NA	NA	NA	NA
PI 691244	CPYR_2867.001	Pyrus communis	Plant de Blanc	NA	NA	NA	NA	NA	NA	NA
PI 665780	CPYR_2869.001	Pyrus ussuriensis	Mian Suan (3x?)	NA	CPYR_455.002	Ping Guo Li [Pingo Li]	NA	NA	NCGR	NEW
PI 691234	CPYR_2873.001	Pyrus communis	Diana	NA	CPYR_156.001	Conference	CPYR_563.003	Talasova Zimni	NCGR	NEW: Diana and Talasova Zimni reported as Czech Republic cultivars. Diana reported Konference x Nordhausenská
PI 691235	CPYR_2874.001	Pyrus hybrid	B II-3 = 28-30	NA	CPYR_2859.001	Zutica	CPYR_249.001	Glou Morceau	NCGR	NEW: Origin of Zutica and B II-3 = 28-30 uncertain. B II-3 = 28-30 believed Bartlett seedling, here not confirmed
PI 688109	CPYR_2875.002	Pyrus hybrid	B II-3 = 34 = 36 P. salicifolia	NA	NA	NA	CPYR_249.001	Glou Morceau	NCGR	NEW: Likely direction of this duo. Accessions with similar name to B II-3 were donated to NCGR from Russia in 1991
PI 665802	CPYR_2877.001	Pyrus communis	Shakarok	NA	CPYR_38.001_07	Bartlett	NA	NA	NCGR	NEW
PI 541990	CPYR_288.002	Pyrus ussuriensis	Huangxianshui Li [Huang Hsing Sui Li]	NA	NA	NA	NA	NA	NCGR	NA
PI 691242	CPYR_2880.001	Pyrus pyrifolia	Utrennaya Svezheste	NA	NA	NA	CPYR_2854.001	Shian-Sui Li	NCGR	NEW
PI 657922	CPYR_2881.001	Pyrus communis	Blake's Pride	NA	NA	NA	NA	NA	NCGR	NA
PI 657923	CPYR_2882.001	Pyrus sachokiana	P. sachokiana GE-2006-115 - Georgia	NA	NA	NA	NA	NA	NA	NA
PI 657923	CPYR_2882.002	Pyrus sachokiana	P. sachokiana GE-2006-115 - Georgia	NA	NA	NA	NA	NA	NA	NA
PI 657923	CPYR_2882.004	Pyrus sachokiana	P. sachokiana GE-2006-115 - Georgia	NA	CPYR_2760.001	P. salicifolia N1 - Russia	NA	NA	NCGR	NEW: Believed o.p. seed from GE-2006-114 (CPYR_2892.002), but not 1st degree related
PI 657923	CPYR_2882.003	Pyrus sachokiana	P. sachokiana GE-2006-115 - Georgia	NA	NA	NA	NA	NA	NA	NA
PI 657923	CPYR_2882.005	Pyrus sachokiana	P. sachokiana GE-2006-115 - Georgia	NA	CPYR_2892.002	P. sachokiana GE-2006-114	NA	NA	NCGR	confirmed
PI 657924	CPYR_2883.002	Pyrus salicifolia	P. salicifolia GE-2006-111 - Georgia, Vashlovani	NA	NA	NA	NA	NA	NA	NA
PI 657924	CPYR_2883.003	Pyrus salicifolia	P. salicifolia GE-2006-111 - Georgia, Vashlovani	NA	NA	NA	NA	NA	NA	NA
PI 657925	CPYR_2884.001	Pyrus communis subsp. caucasica	P. (salicifolia hyb.) communis ssp. caucasica GE-2006-128 - Kakhe	NA	NA	NA	NA	NA	NA	NA
PI 688115	CPYR_2892.002	Pyrus sachokiana	P. sachokiana GE-2006-114	NA	NA	NA	NA	NA	NA	NA
PI 688164	CPYR_2898.001	Pyrus communis	Hand Village Pear AM-2006-225	NA	NA	NA	NA	NA	NA	NA
PI 688084	CPYR_2901.001	Pyrus hybrid	P. salicifolia large fruited hybrid AM-2006-186 - Armenia, Eghegi	NA	NA	NA	NA	NA	NA	NA
PI 541993	CPYR_291.001	Pyrus ussuriensis	Hung Li	NA	NA	NA	NA	NA	NCGR	NA
PI 688191	CPYR_2913.001	Pyrus communis	96.FI.12 (P. communis rootstock clone)	1979	CPYR_38.001_07	Bartlett	NA	NA	NCGR	NEW: Believed seedling of Mora, here not confirmed
CPYR 2915	CPYR_2915.001	Pyrus communis	G.45.11	NA	CPYR_192.001	Docteur Jules Guyot (=Limonera)	NA	NA	NCGR	NEW
PI 280034	CPYR_292.001	Pyrus communis	Huyshe's Victoria	1833	CPYR_335.001	Lajre (3x)	CPYR_75.002	Beurré Easter	Hedrick et al., 1921; Morgan, 2015	NEW: Huyshe's Victoria raised ca. 1830 in UK, believed Gansel's Bergamot x Marie Louise, here not confirmed
PI 657927	CPYR_2920.001	Pyrus hybrid	David	NA	NA	NA	NA	NA	NCGR	NA
PI 657929	CPYR_2922.001	Pyrus communis	Sauvignac	NA	CPYR_2706.001	Bessemianka	CPYR_1631.001	Clapp Favorite	NCGR	NEW: Sauvignac believed Kurskaya x Flemish Beauty (known identical to Lesnaya Krasavitza, which appeared = Comtesse de Paris), here not confirmed
PI 665741	CPYR_2925.001	Pyrus ussuriensis	P. ussuriensis 86-077 sdlg. C	collected 1984	NA	NA	CPYR_136.004	Chojuro	NCGR	NEW
PI 665742	CPYR_2926.001	Pyrus communis	Riehl Best	NA	NA	NA	NA	NA	Hedrick et al., 1921	NA
PI 688074	CPYR_2928.001	Pyrus ussuriensis	Guan-Hong-Shieo	NA	NA	NA	CPYR_291.001	Hung Li	NCGR	NEW: Not sure about direction of this duo
PI 691239	CPYR_2929.001	Pyrus hybrid	India IC 20818	NA	NA	NA	CPYR_533.001	Sivaganga Estate	NCGR	NEW: Accessions from India, not sure which one came first
PI 693201	CPYR_2930.002	Pyrus communis	Lutsu Voipirn	NA	NA	NA	NA	NA	NA	NA
PI 665744	CPYR_2932.001	Pyrus communis	Sunrise	NA	NA	NA	NA	NA	NA	NA
PI 665745	CPYR_2934.003	Pyrus ×sinkiangensis	Chinese Fragrant Pear Seedling 3	2007	CPYR_2989.003	Chinese Fragrant Pear	NA	NA	NCGR	confirmed
PI 665745	CPYR_2934.004	Pyrus ×sinkiangensis	Chinese Fragrant Pear Seedling 4	NA	NA	NA	NA	NA	NCGR	NA
PI 665745	CPYR_2934.005	Pyrus ×sinkiangensis	Chinese Fragrant Pear Seedling 5	NA	NA	NA	NA	NA	NCGR	NA
PI 657932	CPYR_2935.002	Pyrus salicifolia	P. salicifolia - AZN-91 Azerbaijan	NA	NA	NA	NA	NA	NA	NA
PI 657932	CPYR_2935.006	Pyrus salicifolia	P. salicifolia - AZN-91 Azerbaijan	NA	NA	NA	NA	NA	NA	NA
PI 665746	CPYR_2937.002	Pyrus ussuriensis	P. ussuriensis JPN-2009-145	NA	NA	NA	NA	NA	NA	NA
PI 665748	CPYR_2939.001	Pyrus ussuriensis	P. ussuriensis JPN-2009-149	NA	NA	NA	NA	NA	NA	NA
PI 352641	CPYR_294.001	Pyrus pyrifolia	Imamura Aki	NA	NA	NA	NA	NA	Sawamura et al., 2008; Morgan, 2015	NA
PI 665750	CPYR_2941.001	Pyrus hybrid	Tennosui	1992	CPYR_1167.001	Magness	NA	NA	NCGR	NEW: Believed pollinated by Hosui, here not confirmed
PI 665751	CPYR_2942.001	Pyrus hybrid	Southern King	1992	CPYR_2525.001	Tennessee	NA	NA	NCGR	NEW: Southern King known seedling of Tennessee, here confirmed, believd to be pollinated by Hosui, here not confirmed
PI 688149	CPYR_2944.001	Pyrus communis	De Cloche (3x)	NA	NA	NA	NA	NA	NA	NA
PI 665813	CPYR_2945.001	Pyrus communis	Jaunette	NA	NA	NA	NA	NA	NA	NA
PI 665753	CPYR_2946.001_2	Pyrus communis	Beurré Crapaud	NA	NA	NA	NA	NA	NA	NA
PI 688192	CPYR_2947.001	Pyrus communis	Faccia della Madonna	NA	CPYR_451.002	Petit Blanquet	NA	NA	NCGR	NEW
PI 318871	CPYR_295.001	Pyrus dimorphophylla	P. dimorphophylla - Inunashi - Japan	NA	NA	NA	NA	NA	NA	NA
PI 665754	CPYR_2951.001	Pyrus communis	Gldani Pear G10-120	NA	NA	NA	NA	NA	NA	NA
PI 665755	CPYR_2952.001	Pyrus salicifolia	P. salicifolia - Georgia G10-122	2010	NA	NA	CPYR_249.001	Glou Morceau	NCGR	NEW
PI 665755	CPYR_2952.003	Pyrus salicifolia	P. salicifolia - Georgia G10-122	2010	NA	NA	NA	NA	NA	NA
PI 688137	CPYR_2955.001	Pyrus communis	Horner 4	NA	NA	NA	NA	NA	NA	NA
PI 688117	CPYR_2956.001	Pyrus communis	Horner 10	NA	CPYR_1325.001	OHxF 40	CPYR_709.001	OHxF 51	Mielke & Smith, 2002	NEW: Horner series known to have originated from o.p. of five OHxF clonal rootstocks (OHxF 40- 51- 87- 333- and 339), here exact parents identified
PI 228013	CPYR_296.002	Pyrus pyrifolia	Ishiiwase	NA	NA	NA	NA	NA	Sawamura et al., 2008	NA
PI 688119	CPYR_2960.001	Pyrus communis	Rutter	introduced 1867	CPYR_602.004	White Doyenne	CPYR_78.002	Beurré Gris	Hedrick et al., 1921; Morgan, 2015	NEW
PI 688120	CPYR_2961.003	Pyrus spinosa	P. spinosa ALB-2011-001	NA	NA	NA	NA	NA	NA	NA
PI 688120	CPYR_2961.002	Pyrus spinosa	P. spinosa ALB-2011-001	NA	NA	NA	NA	NA	NA	NA
PI 665757	CPYR_2962.005	Pyrus spinosa	P. spinosa ALB-2011-007	NA	NA	NA	NA	NA	NA	NA
PI 665757	CPYR_2962.006	Pyrus spinosa	P. spinosa ALB-2011-007	NA	NA	NA	NA	NA	NA	NA
PI 665758	CPYR_2963.004	Pyrus spinosa	P. spinosa ALB-2011-010	NA	NA	NA	NA	NA	NA	NA
PI 665759	CPYR_2964.001	Pyrus spinosa	P. spinosa ALB-2011-015	NA	NA	NA	NA	NA	NA	NA
PI 665759	CPYR_2964.005	Pyrus spinosa	P. spinosa ALB-2011-015	NA	NA	NA	NA	NA	NA	NA
PI 665760	CPYR_2965.001	Pyrus communis subsp. pyraster	P. communis ssp. pyraster ALB-2011-024	NA	NA	NA	NA	NA	NA	NA
PI 665760	CPYR_2965.003	Pyrus communis subsp. pyraster	P. communis ssp. pyraster ALB-2011-024	NA	NA	NA	NA	NA	NA	NA
PI 665761	CPYR_2966.001	Pyrus spinosa	P. spinosa ALB-2011-028	NA	NA	NA	NA	NA	NA	NA
PI 665762	CPYR_2967.004	Pyrus spinosa	P. spinosa ALB-2011-034	NA	NA	NA	NA	NA	NA	NA
PI 665762	CPYR_2967.002	Pyrus spinosa	P. spinosa ALB-2011-034	NA	NA	NA	NA	NA	NA	NA
PI 665763	CPYR_2968.001	Pyrus spinosa	P. spinosa ALB-2011-038	NA	NA	NA	NA	NA	NA	NA
PI 665763	CPYR_2968.002	Pyrus spinosa	P. spinosa ALB-2011-038	NA	NA	NA	NA	NA	NA	NA
PI 665764	CPYR_2969.002	Pyrus spinosa	P. spinosa ALB-2011-043	NA	NA	NA	NA	NA	NA	NA
PI 665764	CPYR_2969.003	Pyrus spinosa	P. spinosa ALB-2011-043	NA	NA	NA	NA	NA	NA	NA
PI 665765	CPYR_2970.002	Pyrus spinosa	P. spinosa ALB-2011-064	NA	NA	NA	NA	NA	NA	NA
PI 665765	CPYR_2970.001	Pyrus spinosa	P. spinosa ALB-2011-064	NA	NA	NA	NA	NA	NA	NA
PI 665766	CPYR_2971.001	Pyrus spinosa	P. spinosa ALB-2011-067	NA	NA	NA	NA	NA	NA	NA
PI 665766	CPYR_2971.004	Pyrus spinosa	P. spinosa ALB-2011-067	NA	NA	NA	NA	NA	NA	NA
PI 665767	CPYR_2972.007	Pyrus spinosa	P. spinosa ALB-2011-070	NA	NA	NA	NA	NA	NA	NA
PI 665767	CPYR_2972.003	Pyrus spinosa	P. spinosa ALB-2011-070	NA	NA	NA	NA	NA	NA	NA
PI 665768	CPYR_2973.001	Pyrus spinosa	P. spinosa ALB-2011-072	NA	NA	NA	NA	NA	NA	NA
PI 665768	CPYR_2973.002	Pyrus spinosa	P. spinosa ALB-2011-072	NA	NA	NA	NA	NA	NA	NA
PI 665769	CPYR_2974.001	Pyrus spinosa	P. spinosa ALB-2011-078	NA	NA	NA	NA	NA	NA	NA
PI 665769	CPYR_2974.002	Pyrus spinosa	P. spinosa ALB-2011-078	NA	NA	NA	NA	NA	NA	NA
PI 665770	CPYR_2975.002	Pyrus spinosa	P. spinosa ALB-2011-089a	NA	NA	NA	NA	NA	NA	NA
PI 665770	CPYR_2975.006	Pyrus spinosa	P. spinosa ALB-2011-089b	NA	NA	NA	NA	NA	NA	NA
-	CPYR_2975.004	Pyrus spinosa	P. spinosa ALB-2011-089b	NA	NA	NA	NA	NA	NA	NA
PI 691228	CPYR_2978.001	Pyrus communis	Malti	NA	NA	NA	NA	NA	NCGR	NA
PI 693198	CPYR_2980.001	Pyrus ×sinkiangensis	Keshinugeamut Li	NA	NA	NA	NA	NA	NA	NA
PI 691237	CPYR_2982.001	Pyrus sp.	Marut	NA	NA	NA	NA	NA	NA	NA
PI 693204	CPYR_2983.001	Pyrus communis	Birleshik 84-1 - Turkmenistan	NA	CPYR_38.001_07	Bartlett	CPYR_1165.001	Bosc - OP-5	NCGR	NEW
PI 693206	CPYR_2984.001	Pyrus communis	India NIC 19390	NA	NA	NA	NA	NA	NA	NA
PI 688102	CPYR_2986.001	Pyrus communis	Arlingham Squash	reported 1884	NA	NA	CPYR_103.001	Brandy	Hedrick et al., 1921	NEW: English pear for perry first reported in 1884 ; Brandy arose in UK, well known for perry in 1800's
PI 688131	CPYR_2987.001	Pyrus communis	Oldfield	NA	NA	NA	NA	NA	Hedrick et al., 1921; Morgan, 2015	NA
PI 688121	CPYR_2988.001	Pyrus communis	Gem (US 71655-014)	1970	CPYR_2960.001	Rutter	NA	NA	Bell et al., 2014	NEW: Gem thought to be Sheldon x US62563-004 (US309 x US539). However, Sheldon seems related to 2nd degree with Gem. Gem has degrees of relationship also with US309, Michigan 437 (parent of both US309 and US539), Seckel, Bartlett and Barseck, all in its pedigree
PI 665771	CPYR_2989.003	Pyrus ×sinkiangensis	Chinese Fragrant Pear	NA	NA	NA	NA	NA	NA	NA
PI 665772	CPYR_2990.001	Pyrus ×bretschneideri	Ya Li seedling China source	2011	CPYR_1678.001	Ya Li	CPYR_620.001	Yaguang Li [Ya Kuang Li]	NCGR	NEW: confirmed Ya Li parentage, second parent inferred as Yaguang Li [Ya Kuang Li]
PI 665772	CPYR_2990.003	Pyrus ×bretschneideri	Ya Li seedling China source	2011	CPYR_1678.001	Ya Li	CPYR_620.001	Yaguang Li [Ya Kuang Li]	NCGR	NEW: confirmed Ya Li parentage, second parent inferred as Yaguang Li [Ya Kuang Li]
PI 688202	CPYR_2992.001	Pyrus communis	Kings Valley Pear 1	NA	NA	NA	NA	NA	NCGR	NA
PI 688180	CPYR_2993.001	Pyrus communis	Kings Valley Pear 2	NA	NA	NA	CPYR_2992.001	Kings Valley Pear 1	NCGR	NEW: Collected from same property, not sure which one is parent and which one offsrping
PI 542012	CPYR_3.003	Pyrus ussuriensis	P. ussuriensis K-8 (hybrid) - Korea	NA	NA	NA	NA	NA	NA	NA
PI 693196	CPYR_3000.001	Pyrus ussuriensis	Ba Li Shian	NA	NA	NA	CPYR_288.002	Huangxianshui Li [Huang Hsing Sui Li]	NCGR	NEW: unknown direction of this duo. Ba Li Shian PO related to Huangxianshui Li and Shu Li, but it is not offspring of both, so one must be its parent and the other one its offspring
PI 688126	CPYR_3003.001	Pyrus communis	Turkmenistan No. 8	NA	NA	NA	NA	NA	NA	NA
PI 688156	CPYR_3004.001	Pyrus pyrifolia	Tama	1963	NA	NA	CPYR_322.001	Kosui	Sawamura et al., 2008; Morgan, 2015	confirmed
PI 693213	CPYR_3006.001	Pyrus communis	Fowler Pear	1863	NA	NA	CPYR_602.004	White Doyenne	NCGR	NEW
PI 307541	CPYR_301.002	Pyrus communis	Jalovcovka	NA	NA	NA	CPYR_602.004	White Doyenne	NCGR	NEW
PI 688204	CPYR_3011.001	Pyrus communis	Suij	NA	CPYR_244.004	Gieser Wildeman	CPYR_148.001	Doyenne du Comice	NCGR	NEW: Believed cross Saint-Rémy x Comice, but here only Comice confirmed
PI 693214	CPYR_3014.001	Pyrus communis	Loreli's Favorite	propagated 2012	CPYR_38.001_07	Bartlett	NA	NA	NCGR	NEW
PI 49490	CPYR_3015.001	Pyrus communis	Giant Seckel	released 1920	CPYR_519.001	Seckel	NA	NA	NCGR	confirmed: While Giant Seckel believed synonym of Seckel in Morgan, 2015, in NCGR reported as seedling of Seckel
CPYR 3016	CPYR_3016.001	Pyrus communis	Flattened Pear	NA	NA	NA	NA	NA	NA	NA
PI 541898	CPYR_303.003	Pyrus pyrifolia	Japanese Golden Russet	NA	NA	NA	NA	NA	NCGR	NA
PI 285530	CPYR_304.001	Pyrus communis	Johantorp	NA	NA	NA	CPYR_162.001	Vicar of Winkfield	NCGR	NEW
PI 200378	CPYR_305.005	Pyrus communis	Josephine de Malines	1830	NA	NA	CPYR_171.002	Urbaniste	Hedrick et al., 1921; Morgan, 2015	NEW
PI 292376	CPYR_307.001	Pyrus communis	Jubileinaia	introduced 1963	CPYR_38.001_07	Bartlett	CPYR_63.001	Anjou	NCGR	NEW
PI 541122	CPYR_31.003	Pyrus communis	Barillet Deschamp	released 1912	NA	NA	CPYR_64.003	Beurré d'Arenberg	NCGR	NEW
PI 282972	CPYR_311.004	Pyrus communis	Kair Aarmund	NA	NA	NA	NA	NA	NCGR	NA
PI 40019	CPYR_314.001	Pyrus sp.	Kansu Pear	NA	NA	NA	NA	NA	NCGR	NA
PI 228014	CPYR_317.003	Pyrus pyrifolia	Kikusui	1915	NA	NA	CPYR_413.001	Nijisseiki	Sawamura et al., 2008	confirmed
PI 352633	CPYR_318.002	Pyrus pyrifolia	Kimizukawase	1931	NA	NA	CPYR_178.002	Doitsu	Sawamura et al., 2008	confirmed
PI 307542	CPYR_320.002	Pyrus communis	Kiparyjska	NA	NA	NA	NA	NA	NCGR	NA
PI 352634	CPYR_322.001	Pyrus pyrifolia	Kosui	1941	CPYR_317.003	Kikusui	NA	NA	Sawamura et al., 2008; Morgan, 2015	confirmed
PI 295680	CPYR_327.003	Pyrus communis	Kruidernier	NA	NA	NA	NA	NA	Morgan, 2015	NA
PI 228015	CPYR_329.001	Pyrus pyrifolia	Kumoi [Kumoe]	1939	CPYR_296.002	Ishiiwase	CPYR_622.001	Yakumo	Sawamura et al., 2008; Morgan, 2015	confirmed
PI 295092	CPYR_335.001	Pyrus communis	Lajre (3x)	NA	CPYR_249.001	Glou Morceau	NA	NA	NCGR	NEW
PI 541212	CPYR_339.002	Pyrus communis	Lawrence	pre 1843	NA	NA	CPYR_602.004	White Doyenne	Hedrick et al., 1921	confirmed White Doyenne parentage: Lawrence = ﻿Saint Germain x White Doyenne. ﻿Saint Germain is not held at NCGR
PI 541213	CPYR_340.001	Pyrus communis	Lawson	1800	CPYR_602.004	White Doyenne	CPYR_202.003	Early Harvest (=Chambers)	Hedrick et al., 1921; Morgan, 2015	NEW: Early Harvest ﻿have been brought to Middletown, Kentucky, from Maryland about 1800, so must be older. Lawson arose ca. 1800 in NY state.
PI 263682	CPYR_341.003	Pyrus communis	Le Brun	1855	CPYR_249.001	Glou Morceau	CPYR_38.001_07	Bartlett	Hedrick et al., 1921; Morgan, 2015	NEW: Believed seedling of Doyenne d'Hiver or Beurré d'Arenberg. Beurré Arenberg was confused with Glou Moreceau in the past
PI 260158	CPYR_343.001	Pyrus communis	Le Lectier	pre 1882	CPYR_249.001	Glou Morceau	CPYR_59.002	Beurré Clairgeau	Hedrick et al., 1921; Morgan, 2015	NEW: Believed Bartlett x Bergamotte Fortunée, here not confirmed
PI 322035	CPYR_344.001	Pyrus communis	Le Nain Vert (Genetic Dwarf)	first fruited 1839	CPYR_593.002	Verte Longue d'Automne	CPYR_393.003	Messire Jean	Hedrick et al., 1921	NEW: Verte Longue 1628, Messire Jean 1600 to early 1800's, Le Nain Vert first fruited 1839
PI 541214	CPYR_345.003	Pyrus communis	Lehoux Grignon	listed 1895	NA	NA	CPYR_602.004	White Doyenne	Morgan, 2015	NEW
PI 541215	CPYR_346.001	Pyrus communis	Lemon	NA	NA	NA	NA	NA	Hedrick et al., 1921; Morgan, 2015	NA
PI 318867	CPYR_347.001	Pyrus communis	Leopardo Morettini	introduced 1967	CPYR_2286.001	Coscia (Tardive?)	CPYR_75.002	Beurré Easter	Morgan, 2015	confirmed: Coscia Tardive is actually Coscia.
PI 541124	CPYR_35.001	Pyrus communis	Barnet	NA	NA	NA	NA	NA	Morgan, 2015	NA
PI 541216	CPYR_352.004	Pyrus communis	Lieutenant Poidevin	pre 1853	CPYR_17.001	Duchesse d'Angouleme	NA	NA	Hedrick et al., 1921	NEW
PI 541217	CPYR_354.001	Pyrus communis	Lincoln	1835	NA	NA	CPYR_602.004	White Doyenne	Hedrick et al., 1921	NEW
PI 541994	CPYR_355.001	Pyrus ussuriensis	Lao Suan Li [Lo Suan Li]	NA	NA	NA	NA	NA	NCGR	NA
PI 541219	CPYR_357.003	Pyrus communis	Longworth	NA	NA	NA	NA	NA	Hedrick et al., 1921	NA
PI 260159	CPYR_359.001	Pyrus communis	Louis Pasteur	reported 1909	CPYR_1164.001	Winter Nelis	CPYR_558.002	Beurré Superfin	Hedrick et al., 1921	NEW
PI 215321	CPYR_36.002	Pyrus communis	Baronne Leroy	NA	NA	NA	NA	NA	Hedrick et al., 1921	NA
PI 541221	CPYR_361.002	Pyrus communis	Louis Vilmorin	1863	CPYR_59.002	Beurré Clairgeau	CPYR_2757.001	Bellissime d'Hiver	Hedrick et al., 1921	NEW: Known seedling of Beurré Clairgeau, second parent inferred as Bellissime d'Hiver
PI 541222	CPYR_362.001	Pyrus communis	Lowry No. 1	NA	CPYR_233.001	Forelle	CPYR_38.001_07	Bartlett	NCGR	NEW
PI 541223	CPYR_364.002	Pyrus communis	Lucy Duke	1880	CPYR_38.001_07	Bartlett	NA	NA	Hedrick et al., 1921	NEW: known seedling of Bartlett, confirmed, but pollen parent was believed Winter Nelis, not confirmed
PI 541322	CPYR_367.001	Pyrus communis	Luscious	1954	CPYR_1702.001	South Dakota E-31	NA	NA	NCGR	NEW: South Dakota E-31 x Ewart, but here only South Dakota E-31 confirmed
PI 541224	CPYR_370.001	Pyrus communis	Madame Andre Leroy	reported 1862	CPYR_249.001	Glou Morceau	CPYR_59.002	Beurré Clairgeau	Hedrick et al., 1921	NEW
PI 541225	CPYR_372.003	Pyrus communis	Madame Favre	first fruited 1861	NA	NA	CPYR_249.001	Glou Morceau	Hedrick et al., 1921; Morgan, 2015	NEW
PI 541226	CPYR_373.003	Pyrus communis	Madame Lye Baltet	market 1877	NA	NA	CPYR_75.002	Beurré Easter	Hedrick et al., 1921	NEW
PI 123968	CPYR_374.002	Pyrus communis	Madame Soulanges	NA	CPYR_249.001	Glou Morceau	CPYR_17.001	Duchesse d'Angouleme	NCGR	NEW: Is it the same as Mademoiselle Solange in Morgan (2015)?
PI 300693	CPYR_38.001_07	Pyrus communis	Bartlett	pre 1770	CPYR_602.004	White Doyenne	NA	NA	Hedrick et al., 1921; Morgan, 2015	NEW: White Doyenne was believed to be the ancient variety 'Doyenneé Blanc' (1652), and possibly the same as 'Ghiacciuola', synonym of 'de Neige' (1559). In UK possibly known as 'Doyenne or St Michael' (post 1696) and 'Doyenne or Deanery Pear' (1724). Well known as White Doyenné during 1800's. Bartlett found in Berkshire (UK), described as a very small plant in 1770
PI 541229	CPYR_381.005	Pyrus communis	Marguerite Marillat	exhibited 1874	CPYR_38.001_07	Bartlett	CPYR_59.002	Beurré Clairgeau	Hedrick et al., 1921; Morgan, 2015	NEW
PI 541230	CPYR_382.002	Pyrus communis	Marie Louise	1809	CPYR_602.004	White Doyenne	CPYR_593.002	Verte Longue d'Automne	Hedrick et al., 1921; Morgan, 2015	NEW
PI 255615	CPYR_383.004	Pyrus communis	Mariette de Millepieds	first fruited 1854	CPYR_17.001	Duchesse d'Angouleme	CPYR_56.002	Besi d'Hery	Hedrick et al., 1921	NEW
PI 231810	CPYR_389.002	Pyrus communis	Madame du Ballett	introduced 1894	NA	NA	CPYR_53.001	Bergamotte Esperen	Hedrick et al., 1921; Morgan, 2015	NEW: Bergamotte Esperen raised ca. 1830 in Belgium, introduced to France 1844. Madame du Ballet arose in France and introduced in 1894
PI 313932	CPYR_390.001	Pyrus elaeagrifolia	P. elaeagrifolia (hybrid)	NA	NA	NA	NA	NA	NA	NA
PI 324132	CPYR_391.002	Pyrus communis	Mellina	described 1956	CPYR_59.002	Beurré Clairgeau	CPYR_38.001_07	Bartlett	Morgan, 2015	confirmed
PI 541232	CPYR_392.002	Pyrus communis	Mendel	introduced 1920	CPYR_1164.001	Winter Nelis	CPYR_38.001_07	Bartlett	NCGR	NEW
PI 541233	CPYR_393.003	Pyrus communis	Messire Jean	NA	NA	NA	NA	NA	Hedrick et al., 1921; Morgan, 2015	NA
PI 541720	CPYR_395.002	Pyrus hybrid	Missouri No. 83	introduced 1953	CPYR_519.001	Seckel	NA	NA	NCGR	NEW
PI 541234	CPYR_397.002	Pyrus communis	Monchallard	1810	NA	NA	CPYR_602.004	White Doyenne	Hedrick et al., 1921; Morgan, 2015	NEW
PI 541314	CPYR_398.001	Pyrus communis	Mooers	1934	CPYR_17.001	Duchesse d'Angouleme	CPYR_1166.001	Kieffer	NCGR	NEW: Believed cross Duchesse d'Angouleme x Late Faulkner, but here only Duchesse d'Angouleme confirmed
PI 541315	CPYR_399.001	Pyrus communis	unknown	NA	CPYR_38.001_07	Bartlett	CPYR_63.001	Anjou	NCGR	NEW
PI 324125	CPYR_40.004	Pyrus communis	Bella di Giugno (=Mirandino Rosso)	1700	NA	NA	CPYR_2859.001	Zutica	Morgan, 2015	NEW: Origin of Zutica uncertain; Mirandino Rosso originated ca. 1700 in Italy. Not sure which one came first.
PI 324133	CPYR_401.003	Pyrus communis	Mora	introduced 1956	CPYR_59.002	Beurré Clairgeau	NA	NA	Morgan, 2015	NEW: Believed Beurré Clarigeau x Martin Sec, however Martin Sec might be a sampling error
PI 318869	CPYR_402.001	Pyrus communis	Morettini 113	released 1961	CPYR_38.001_07	Bartlett	CPYR_139.004	Citron de Carmes (Madeleine)	NCGR	confirmed (Green Chisel = Citron de Carmes)
PI 282975	CPYR_403.003	Pyrus communis	Muskatelka Prava	NA	NA	NA	NA	NA	NCGR	NA
PI 255616	CPYR_410.001	Pyrus communis	Napoleon	NA	NA	NA	NA	NA	Hedrick et al., 1921; Morgan, 2015	NA
PI 392317	CPYR_412.001	Pyrus pyrifolia	Niitaka (=Singo)	1915	NA	NA	CPYR_136.004	Chojuro	Sawamura et al., 2008; Morgan, 2015	confirmed
PI 224196	CPYR_413.001	Pyrus pyrifolia	Nijisseiki	NA	NA	NA	NA	NA	Sawamura et al., 2008; Morgan, 2015	NA
PI 541728	CPYR_415.001	Pyrus hybrid	Nijisseiki x Old Home (Decline susceptible)	NA	NA	NA	NA	NA	NCGR	NA
PI 231806	CPYR_416.002	Pyrus communis	Normannischen Ciderbirne	NA	NA	NA	NA	NA	Hedrick et al., 1921	NA
PI 541235	CPYR_418.003	Pyrus communis	Notaire Lepin (= Doyenne George Boucher)	1860	CPYR_249.001	Glou Morceau	CPYR_17.001	Duchesse d'Angouleme	Hedrick et al., 1921; Morgan, 2015	NEW: Believed seedling of Comice, which instead is FS
PI 246419	CPYR_420.001	Pyrus communis	Nouveau Poiteau	1827	NA	NA	CPYR_78.002	Beurré Gris	Hedrick et al., 1921; Morgan, 2015	NEW: Beurré Gris (= Beurré Brown) origin confused, might be as early as 1628 or 1867, France. Nouveau Poiteau raised 1827 Belgium
PI 292372	CPYR_421.003	Pyrus communis	Novogodnaia	NA	NA	NA	NA	NA	NA	NA
PI 541237	CPYR_425.001	Pyrus communis	OH 20 fire blight resistant rootstock	introduced 1925	CPYR_431.001	Old Home	NA	NA	Simard & Michelesi, 2002	confirmed
PI 541238	CPYR_427.001	Pyrus hybrid	OH 50 fire blight resistant rootstock	introduced 1925	CPYR_431.001	Old Home	CPYR_38.001_07	Bartlett	NCGR	NEW: OH 50 known as Old Home seedling; second parent identified as Bartlett
PI 392318	CPYR_428.001	Pyrus pyrifolia	Okusankichi	NA	NA	NA	NA	NA	Sawamura et al., 2008; Morgan, 2015	NA
PI 541456	CPYR_431.001	Pyrus communis	Old Home	NA	NA	NA	NA	NA	Morgan, 2015	NA
PI 437060	CPYR_432.001	Pyrus communis	Onward	1947	CPYR_2269.001	Laxton's Superb	CPYR_148.001	Doyenne du Comice	Morgan, 2015	confirmed
PI 541239	CPYR_433.002	Pyrus hybrid	Orel No. 15	NA	NA	NA	NA	NA	Hedrick et al., 1921; Morgan, 2015	NA
PI 541316	CPYR_435.001	Pyrus communis	Packham Late	NA	CPYR_230.001	Fondante de Charneu	CPYR_59.002	Beurré Clairgeau	NCGR	NEW
PI 280405	CPYR_436.001	Pyrus communis	Packham's Triumph	introduced early 1900s	CPYR_1164.001	Winter Nelis	CPYR_38.001_07	Bartlett	Morgan, 2015	NEW: Believed Uvedale's St Germain (= Pound) x Bartlett, here only Bartlett confirmed
PI 541998	CPYR_439.001	Pyrus ussuriensis	Pai Li (Beijing White Pear)	NA	NA	NA	CPYR_269.003	Hau Kai	NCGR	NEW: Likely direction of this duo
PI 541126	CPYR_44.004	Pyrus communis	Belle de Feron	NA	NA	NA	NA	NA	Hedrick et al., 1921	NA
PI 280035	CPYR_440.002	Pyrus communis	Parrot	NA	NA	NA	NA	NA	Hedrick et al., 1921; Morgan, 2015	NA
PI 131662	CPYR_441.001	Pyrus communis	Passe Crassane	1845	CPYR_75.002	Beurré Easter	NA	NA	Hedrick et al., 1921; Morgan, 2015	NEW
PI 541240	CPYR_446.001	Pyrus communis	P. Barry	first fruited 1873	NA	NA	CPYR_1164.001	Winter Nelis	Hedrick et al., 1921	NEW: Believed seedling of Belle Lucrative, here not confirmed
PI 392321	CPYR_448.002	Pyrus communis	Pautalia (=Jubileer D'ar)	1956	CPYR_205.002	Ecmianka	CPYR_139.004	Citron de Carmes (Madeleine)	; NCGRBassil & Postman, 2010	NEW: Pautalia = ﻿Green Magdelene (is this = to Citron de Carmes - Madeleine?) x B. Giffard; Jubileer d'Ar = ﻿Clapp Favorite x Klementina. Pautalia also resulted identical to Angelica di Saonara, pedigree unknown.
PI 541304	CPYR_45.001	Pyrus communis	Belle Poitevien	listed 1912	CPYR_382.002	Marie Louise	NA	NA	NCGR	NEW
PI 277526	CPYR_450.003	Pyrus communis	Petit Muscat	NA	NA	NA	NA	NA	Morgan, 2015	NA
PI 541242	CPYR_451.002	Pyrus communis	Petit Blanquet	NA	NA	NA	NA	NA	Hedrick et al., 1921	NA
PI 541999	CPYR_453.003	Pyrus ×bretschneideri	Ping Ding Li	NA	CPYR_269.003	Hau Kai	CPYR_1678.001	Ya Li	NCGR	NEW: Ya Li old cultivar from Northeast China; Hau Kai very old cultivar from Liaoning (Northeast) China. Ping Ding Li believed P. ussuriensis x P. phaeocarpa
PI 267863	CPYR_455.002	Pyrus ussuriensis	Ping Guo Li [Pingo Li]	NA	NA	NA	NA	NA	NCGR	NA
PI 324135	CPYR_457.002	Pyrus communis	Porporata	described 1956	CPYR_1187.001	Beurré Hardy	CPYR_1687.002	Roosevelt	Morgan, 2015	confirmed
PI 279338	CPYR_459.001	Pyrus communis	Precoce de Trevoux	described 1862	CPYR_38.001_07	Bartlett	CPYR_2724.001	Comtesse de Paris	Hedrick et al., 1921; Morgan, 2015	NEW
PI 322034	CPYR_46.001	Pyrus communis	Belle Guerandaise	1869	CPYR_249.001	Glou Morceau	CPYR_17.001	Duchesse d'Angouleme	Hedrick et al., 1921; Morgan, 2015	NEW: Believed seedling of Comice, which instead is FS
PI 279339	CPYR_462.001	Pyrus communis	President Drouard	introduced 1886	CPYR_249.001	Glou Morceau	CPYR_17.001	Duchesse d'Angouleme	Hedrick et al., 1921; Morgan, 2015	NEW
PI 322036	CPYR_465.002	Pyrus communis	President Heron	introduced 1897	CPYR_441.001	Passe Crassane	CPYR_59.002	Beurré Clairgeau	Hedrick et al., 1921; Morgan, 2015	NEW
PI 541245	CPYR_466.002	Pyrus communis	President Loubet	NA	NA	NA	NA	NA	Hedrick et al., 1921	NA
PI 264197	CPYR_467.002	Pyrus communis	President Osmonville 40	1834	CPYR_249.001	Glou Morceau	CPYR_38.001_07	Bartlett	Hedrick et al., 1921; Morgan, 2015	NEW
PI 392322	CPYR_469.003	Pyrus communis	Progres	1956	CPYR_77.002	Beurré Giffard	CPYR_139.004	Citron de Carmes (Madeleine)	NCGR	confirmed: Known Beurré Giffard x Green Magdelene (Is Green Magdelene = Green Chisel = Madeleine?)
PI 541247	CPYR_470.002	Pyrus communis	Pulteney	1912	CPYR_1164.001	Winter Nelis	CPYR_38.001_07	Bartlett	Morgan, 2015	confirmed
PI 292379	CPYR_471.004	Pyrus communis	Radchinskaia	NA	NA	NA	NA	NA	NCGR	NA
PI 292377	CPYR_472.001	Pyrus communis	Ranniaia Mleevskaia (Mleevskaya Rannaya)	introduced 1963	NA	NA	CPYR_228.001	Belle Lucrative (=Fondante D'Automne)	NCGR	NEW
PI 541317	CPYR_474.001	Pyrus communis	Red Pear	NA	NA	NA	NA	NA	Hedrick et al., 1921	NA
PI 260152	CPYR_48.003	Pyrus communis	Belle Picarde	mid 1800s	NA	NA	CPYR_602.004	White Doyenne	Hedrick et al., 1921	NEW
PI 541250	CPYR_483.002	Pyrus communis	Reimer's Hybrid	NA	CPYR_2724.001	Comtesse de Paris	NA	NA	NCGR	NEW
PI 541251	CPYR_484.002	Pyrus communis	Reliance	1857	CPYR_75.002	Beurré Easter	CPYR_496.001	Rousselet de Reims	Hedrick et al., 1921; Morgan, 2015	NEW
PI 541715	CPYR_486.004	Pyrus hybrid	Richard Peters	selected 1924	CPYR_1166.001	Kieffer	CPYR_519.001	Seckel	Morgan, 2015	NEW: Kieffer parentage confirmed, second parent identified as Seckel
PI 286384	CPYR_487.001	Pyrus communis	Rocha	mid 1800s	NA	NA	CPYR_602.004	White Doyenne	Morgan, 2015	NEW
PI 541252	CPYR_488.001	Pyrus communis	Rogue Red	1947	CPYR_148.001	Doyenne du Comice	NA	NA	Morgan, 2015	NEW: Believed (Comice x Seckel) x Farmingdale, however Comice seems parent, not grand-parent, and Seckel and Farmingdale seem more distantly related
PI 541253	CPYR_489.002	Pyrus communis	Roi Charles de Wurttemberg	1886	CPYR_17.001	Duchesse d'Angouleme	CPYR_59.002	Beurré Clairgeau	Hedrick et al., 1921	NEW: known seedlings of Beurreé Clairgeau (NCGR), second parent identified as Duchesse d'Angouleme
PI 260161	CPYR_490.004	Pyrus communis	King Sobieski	NA	NA	NA	NA	NA	Hedrick et al., 1921	NA
PI 541254	CPYR_491.004	Pyrus communis	Rosee de Juillet	NA	NA	NA	NA	NA	NCGR	NA
PI 295094	CPYR_494.002	Pyrus communis	Rotkottig Frau Ostergotland	NA	NA	NA	NA	NA	NCGR	NA
PI 541256	CPYR_496.001	Pyrus communis	Rousselet de Reims	NA	NA	NA	NA	NA	Hedrick et al., 1921	NA
PI 337444	CPYR_497.001	Pyrus communis	Rousselet of Stuttgart x Dr. Jules Guyot No. II	NA	CPYR_1516.002	Stuttgarter-Geishirtle (= Zuckerbirne)	CPYR_192.001	Docteur Jules Guyot (=Limonera)	NCGR	confirmed: Stuttgarter-Geishirtle (= Zuckerbirne) must be Rousselet of Stuttgart
PI 337446	CPYR_499.001	Pyrus communis	Rousselet of Stuttgart x Dr. Jules Guyot No. VII (Vavilov)	NA	CPYR_1516.002	Stuttgarter-Geishirtle (= Zuckerbirne)	CPYR_192.001	Docteur Jules Guyot (=Limonera)	NCGR	confirmed: Stuttgarter-Geishirtle (= Zuckerbirne) must be Rousselet of Stuttgart
PI 541911	CPYR_5.009	Pyrus pyrifolia	P. pyrifolia K-31 - Korea	NA	NA	NA	NA	NA	NA	NA
PI 337448	CPYR_501.001	Pyrus communis	Rousselet of Stuttgart x Dr. Jules Guyot No. IX	NA	CPYR_1516.002	Stuttgarter-Geishirtle (= Zuckerbirne)	CPYR_192.001	Docteur Jules Guyot (=Limonera)	NCGR	confirmed: Stuttgarter-Geishirtle (= Zuckerbirne) must be Rousselet of Stuttgart
PI 541257	CPYR_502.003	Pyrus communis	Royale Vendee	1860	CPYR_249.001	Glou Morceau	CPYR_75.002	Beurré Easter	Hedrick et al., 1921	NEW
PI 279936	CPYR_504.001	Pyrus communis	RX 196	pre 1960	CPYR_59.002	Beurré Clairgeau	CPYR_38.001_07	Bartlett	NCGR	confirmed
PI 279937	CPYR_505.002	Pyrus communis	RX 226	NA	CPYR_59.002	Beurré Clairgeau	CPYR_38.001_07	Bartlett	NCGR	NEW: Believed Buerre Hardy x Passe Crassane, here not confirmed
PI 279940	CPYR_507.002	Pyrus communis	RX 274	NA	CPYR_38.001_07	Bartlett	CPYR_63.001	Anjou	NCGR	NEW: Believed seedling of Beurré Clairgeau, here not confirmed
PI 541259	CPYR_508.001	Pyrus communis	Saint Andre	pre 1834	NA	NA	CPYR_602.004	White Doyenne	Hedrick et al., 1921	NEW
PI 541260	CPYR_509.001	Pyrus communis	Saint Ghislain	recorded 1851	NA	NA	CPYR_602.004	White Doyenne	Hedrick et al., 1921	NEW
PI 541127	CPYR_51.002	Pyrus communis	Bergamotte d'Automne	NA	NA	NA	NA	NA	Hedrick et al., 1921	NA
PI 277529	CPYR_512.004	Pyrus communis	Sanguinole	known 1500s	NA	NA	CPYR_602.004	White Doyenne	Hedrick et al., 1921; Morgan, 2015	NEW: Hard to tell which one came first. White Doyenne believed to be the ancient vairety 'Doyenneé Blanc' in France (1652), and possibly the same as 'Ghiacciuola', synonym of 'de Neige' in Italy (1559). Sanguinole was grown for centuries in Europe; included in Le Lectier collection in France in 1628
PI 215329	CPYR_513.003	Pyrus communis	Santa Claus	NA	NA	NA	NA	NA	Hedrick et al., 1921; Morgan, 2015	NA
PI 295095	CPYR_514.005	Pyrus communis	Santa Maria	1929-30	CPYR_38.001_07	Bartlett	CPYR_2286.001	Coscia (Tardive?)	Morgan, 2015	confirmed: Coscia Tardive is actually Coscia
PI 286220	CPYR_516.002	Pyrus communis	Scipiona	known late 1600s	NA	NA	CPYR_51.002	Bergamotte d'Automne	Morgan, 2015	NEW
PI 541262	CPYR_519.001	Pyrus communis	Seckel	mid 1700s	CPYR_602.004	White Doyenne	CPYR_496.001	Rousselet de Reims	Hedrick et al., 1921; Morgan, 2015; NCGR	NEW: All very old cultivars. White Doyenne believed to be the ancient variety 'Doyenneé Blanc' (1652), and possibly the same as 'Ghiacciuola', synonym of 'de Neige' (1559). Rousselet de Reims (Rheims) is centuries old, maybe even up to Romans. Seckel found in US mid 1700's. Rousselet de Rheims already believed parent of Seckel
PI 541128	CPYR_52.002	Pyrus communis	Bergamote d'Ete	NA	NA	NA	NA	NA	Hedrick et al., 1921	NA
PI 228017	CPYR_520.001	Pyrus pyrifolia	Seigyoku	1922	CPYR_413.001	Nijisseiki	CPYR_136.004	Chojuro	Sawamura et al., 2008	confirmed
PI 541263	CPYR_521.002	Pyrus communis	Senateur Belle	pre 1900	NA	NA	CPYR_181.001	Doyenne d'Alecon	NCGR	NEW
PI 352635	CPYR_526.002	Pyrus pyrifolia	Shinko	first fruited 1937	NA	NA	CPYR_413.001	Nijisseiki	Sawamura et al., 2008	confirmed
PI 352638	CPYR_527.002	Pyrus pyrifolia	Shinseiho	released 1952	NA	NA	CPYR_413.001	Nijisseiki	NCGR	NEW: Believed Suisei x Shinko, here not confirmed
PI 224087	CPYR_528.001	Pyrus pyrifolia	Shinseiki	1926	CPYR_413.001	Nijisseiki	CPYR_136.004	Chojuro	Sawamura et al., 2008; Morgan, 2015	confirmed
PI 352636	CPYR_529.001	Pyrus pyrifolia	Shinsui	1947	CPYR_317.003	Kikusui	CPYR_318.002	Kimizukawase	Sawamura et al., 2008; Morgan, 2015	confirmed
PI 260153	CPYR_53.001	Pyrus communis	Bergamotte Esperen	NA	NA	NA	NA	NA	Hedrick et al., 1921; Morgan, 2015	NA
PI 132103	CPYR_531.001	Pyrus pyrifolia	Shu Li	presented in US 1939	CPYR_3000.001	Ba Li Shian	NA	NA	NCGR	NEW: unknown direction of this duo. Ba Li Shian PO related to Huangxianshui Li and Shu Li, but it is not offspring of both, so one must be its parent and the other one its offspring
PI 278731	CPYR_533.001	Pyrus pyrifolia	Sivaganga Estate	NA	NA	NA	NA	NA	NCGR	NA
PI 127716	CPYR_534.001	Pyrus hybrid	Sladky	released 1933	NA	NA	CPYR_354.001	Lincoln	NCGR	confirmed
PI 541716	CPYR_535.001	Pyrus hybrid	Smith	reported 1913	CPYR_382.002	Marie Louise	NA	NA	Hedrick et al., 1921	NEW
PI 282978	CPYR_537.001	Pyrus communis	Solanka	NA	NA	NA	CPYR_52.002	Bergamote d'Ete	NCGR	NEW
PI 541129	CPYR_54.002	Pyrus communis	Bergamotte Sageret	reported 1830	NA	NA	CPYR_162.001	Vicar of Winkfield	Hedrick et al., 1921	NEW
PI 541231	CPYR_547.001	Pyrus communis	Maxine	1930	NA	NA	CPYR_602.004	White Doyenne	Morgan, 2015	NEW
PI 541266	CPYR_548.002	Pyrus communis	Stout	1840	NA	NA	CPYR_603.002	White Star	Hedrick et al., 1921	NEW: White Star first reprted 1921. ﻿Stout riginated at Monrovia about 1840. This is likely the direction if this duo because Stout x Bergamott d'Automne not = White Star, so W.hiteStar might be older
PI 541268	CPYR_550.002	Pyrus communis	Success de la Meilleraye	listed 1912	CPYR_17.001	Duchesse d'Angouleme	NA	NA	NCGR	NEW
PI 541269	CPYR_553.002	Pyrus communis	Sucre Verte	known 1670	CPYR_51.002	Bergamotte d'Automne	NA	NA	Hedrick et al., 1921; Morgan, 2015	NEW
PI 352637	CPYR_554.001	Pyrus pyrifolia	Suisei	1939	CPYR_317.003	Kikusui	CPYR_622.001	Yakumo	Sawamura et al., 2008; Morgan, 2015	confirmed
PI 312507	CPYR_556.001	Pyrus communis	Summer Blood Birne	NA	NA	NA	NA	NA	NCGR	NA
PI 264698	CPYR_557.002	Pyrus communis	Summer Muskatel Birne	1798	NA	NA	CPYR_602.004	White Doyenne	Hedrick et al., 1921	NEW: In Hedrick et al. (1921) Baseler Sommer-Muskatellerbirne ﻿raised in Switzerland, 1809; ﻿Kleine gelbe Sommermuskatellerbirne (= ﻿Petite Bergamotte Jaune d'ete) ﻿published by Diel, 1805; ﻿Kleine Lange Sommer-Muskatellerbirne (=﻿ Petite Muscat Long d'Ete) ﻿Thuringia, Ger., 1798
PI 541150	CPYR_558.002	Pyrus communis	Beurré Superfin	1837	CPYR_249.001	Glou Morceau	CPYR_17.001	Duchesse d'Angouleme	Hedrick et al., 1921; Morgan, 2015	NEW: All cultivars grown in Angers, France. Glou Morceau raised in 1759 and intorduced to France in 1806. Ducesse d'Angouleme found in the wild in Anjou area and first propagated in 1808. Beurré Superfin raised in Angers in 1837
PI 541270	CPYR_559.001_2	Pyrus communis	Suzette de Bavay	first fruited 1843	CPYR_38.001_07	Bartlett	CPYR_63.001	Anjou	Hedrick et al., 1921	NEW
PI 541130	CPYR_56.002	Pyrus communis	Besi d'Hery	NA	NA	NA	NA	NA	Hedrick et al., 1921	NA
PI 542002	CPYR_562.003	Pyrus ussuriensis	Da Tou Huang [Ta Tau Huang]	NA	NA	NA	NA	NA	NCGR	NA
PI 282979	CPYR_563.003	Pyrus communis	Talasova Zimni	NA	CPYR_233.001	Forelle	CPYR_2628.003	Para Toto R-091	NCGR	NEW
PI 541271	CPYR_567.001	Pyrus communis	Taynton Squash	NA	NA	NA	NA	NA	Hedrick et al., 1921; Morgan, 2015	NA
PI 541272	CPYR_568.002	Pyrus communis	Tedrow Beauty	NA	CPYR_2826.001	Yaquina (Payson)	CPYR_602.004	White Doyenne	NCGR	NEW: Yaquina originally collected in the 1960s from a pear tree growing near the Yaquina River or Yaquina Bay upstream from Newport, Oregon. Tedrow Beauty was donated in 1981 from Lombard Porter, Oregon State University
PI 541273	CPYR_569.001	Pyrus communis	Thorn	NA	NA	NA	NA	NA	Morgan, 2015	NA
PI 541131	CPYR_57.001	Pyrus communis	Besi de La Motte	reported 1685	CPYR_51.002	Bergamotte d'Automne	NA	NA	Hedrick et al., 1921	NEW: Bergamotte d'Automne very ancient, as early as ﻿1536. Besi de la Motte first reproted ﻿in 1685
PI 541274	CPYR_571.002	Pyrus communis	Thornley	1957	CPYR_38.001_07	Bartlett	CPYR_1164.001	Winter Nelis	Morgan, 2015	NEW
PI 352660	CPYR_572.001	Pyrus communis	Timpurii de Voinsati	NA	CPYR_38.001_07	Bartlett	CPYR_23.002	Arganche	NCGR	NEW
PI 134606	CPYR_573.002	Pyrus hybrid	Tioma	1910	NA	NA	NA	NA	NCGR	NA
PI 295097	CPYR_574.003	Pyrus communis	Tirelemont	NA	NA	NA	NA	NA	NCGR	NA
PI 295098	CPYR_577.001	Pyrus communis	Tongre (=Durondeau)	NA	NA	NA	NA	NA	Hedrick et al., 1921; Morgan, 2015	NA
PI 260162	CPYR_578.001	Pyrus communis	Tonkowietka	NA	NA	NA	NA	NA	NCGR	NA
PI 282980	CPYR_579.002	Pyrus communis	Toulouska pozdni	NA	NA	NA	CPYR_602.004	White Doyenne	NCGR	NEW
PI 137080	CPYR_581.002	Pyrus communis	Triomphe de Touraine	reported 1895	CPYR_249.001	Glou Morceau	CPYR_17.001	Duchesse d'Angouleme	Hedrick et al., 1921	NEW
PI 541275	CPYR_582.003	Pyrus communis	Triomphe de Vienne	1864	CPYR_38.001_07	Bartlett	NA	NA	Hedrick et al., 1921; Morgan, 2015	NEW
PI 292373	CPYR_583.002	Pyrus communis	Trubchanka Popularnaia	NA	NA	NA	NA	NA	NCGR	NA
PI 541276	CPYR_586.001	Pyrus communis	USDA No. 463	NA	CPYR_38.001_07	Bartlett	CPYR_2724.001	Comtesse de Paris	NCGR	NEW
PI 64229	CPYR_588.001	Pyrus hybrid	Van Fleet Hybrid No. 1	introduced 1907	NA	NA	CPYR_339.002	Lawrence	NCGR	NEW: Reported as hybrid Pyrus communis x chinese type
PI 541133	CPYR_59.002	Pyrus communis	Beurré Clairgeau	1830	NA	NA	CPYR_17.001	Duchesse d'Angouleme	Hedrick et al., 1921; Morgan, 2015	confirmed
PI 541277	CPYR_592.001	Pyrus communis	Vermont Beauty	1885	CPYR_286.004	Howell - Sport	CPYR_519.001	Seckel	Hedrick et al., 1921; Morgan, 2015	NEW: Vermont Beauty = Barseck. Barseck was thought cross from Seckel x Bartlett, but here only Seckel confirmed
PI 541278	CPYR_593.002	Pyrus communis	Verte Longue d'Automne	1598	CPYR_496.001	Rousselet de Reims	CPYR_51.002	Bergamotte d'Automne	Hedrick et al., 1921	NEW: Tentative pedigree, since these are all very ancient cultivars. Rousselet de Reims (Rheims) is centuries old, maybe even up to Romans; B. Automne first reported in 1536; V. L. Automne first mentioned in 1628
PI 145821	CPYR_596.001	Pyrus hybrid	Vineland 29018	NA	CPYR_38.001_07	Bartlett	NA	NA	NCGR	NEW: believed Bartlett x Ya Li, but here onlt Bartlett confirmed
PI 541279	CPYR_597.002	Pyrus communis	W-1 fire blight resistant rootstock	1925	CPYR_466.002	President Loubet	NA	NA	NCGR	NEW: Between 1923 and 1931 over 10,000 French Pyrus communis seedlings were grown in Oregon and repeatedly inoculated with the blight organism. W-1 was resistant
PI 66131	CPYR_598.001	Pyrus hybrid	Waite (Canner)	selected 1920	CPYR_38.001_07	Bartlett	CPYR_63.001	Anjou	NCGR	NEW
PI 541280	CPYR_599.001	Pyrus communis	Warner	1832	NA	NA	CPYR_602.004	White Doyenne	Hedrick et al., 1921	NEW
PI 541912	CPYR_6.008	Pyrus pyrifolia	P. pyrifolia K-16 - Korea	NA	NA	NA	NA	NA	NA	NA
PI 541281	CPYR_602.004	Pyrus communis	White Doyenne	NA	NA	NA	NA	NA	Hedrick et al., 1921; Morgan, 2015	NA
PI 541282	CPYR_603.002	Pyrus communis	White Star	NA	NA	NA	NA	NA	Hedrick et al., 1921	NA
PI 279341	CPYR_612.001	Pyrus communis	Williams Precoce Morettini	introduced 1960	CPYR_38.001_07	Bartlett	CPYR_139.004	Citron de Carmes (Madeleine)	Morgan, 2015	confirmed
PI 541286	CPYR_619.001	Pyrus communis	Worden Seckle	1881	CPYR_519.001	Seckel	NA	NA	Hedrick et al., 1921; Morgan, 2015	confirmed (typo: should be Worden Seckel)
PI 541136	CPYR_62.003	Pyrus communis	Beurré d'Angleterre	NA	NA	NA	NA	NA	Hedrick et al., 1921	NA
PI 45845	CPYR_620.001	Pyrus ×bretschneideri	Yaguang Li [Ya Kuang Li]	NA	CPYR_269.003	Hau Kai	NA	NA	NCGR	NEW: Likely direction of this duo
PI 224089	CPYR_622.001	Pyrus pyrifolia	Yakumo	1915	NA	NA	CPYR_413.001	Nijisseiki	Sawamura et al., 2008	confirmed
PI 541287	CPYR_625.001	Pyrus communis	Yellow Huffcap	NA	NA	NA	NA	NA	Morgan, 2015	NA
PI 541956	CPYR_629.001	Pyrus sp.	Kansu x self	NA	NA	NA	NA	NA	NCGR	NA
PI 617502	CPYR_63.001	Pyrus communis	Anjou	introduced UK early 1800s	CPYR_553.002	Sucre Verte	CPYR_602.004	White Doyenne	Hedrick et al., 1921; Morgan, 2015	NEW
PI 349021	CPYR_636.001	Pyrus spinosa	P. spinosa (amygdaliformis) - Macedonia (pure)	NA	NA	NA	NA	NA	NA	NA
PI 349021	CPYR_637.001	Pyrus spinosa	P. spinosa (amygdaliformis) - Macedonia (pure)	NA	NA	NA	NA	NA	NA	NA
PI 349021	CPYR_638.001	Pyrus spinosa	P. spinosa (amygdaliformis) - Macedonia	NA	NA	NA	NA	NA	NA	NA
PI 540922	CPYR_639.001	Pyrus spinosa	P. spinosa (amygdaliformis) - Greece	NA	NA	NA	NA	NA	NA	NA
PI 540931	CPYR_642.001	Pyrus spinosa	P. spinosa (amygdaliformis) - Greece	NA	NA	NA	NA	NA	NA	NA
PI 295083	CPYR_64.003	Pyrus communis	Beurré d'Arenberg	NA	NA	NA	NA	NA	Hedrick et al., 1921; Morgan, 2015	NA
PI 540923	CPYR_641.001	Pyrus spinosa	P. spinosa (amygdaliformis) - Greece (hybrid?)	NA	NA	NA	NA	NA	NA	NA
PI 322707	CPYR_646.001	Pyrus betulifolia	P. betulifolia - Ukraine	NA	NA	NA	NA	NA	NA	NA
PI 541718	CPYR_648.001	Pyrus hybrid	P. betulifolia hybrid	NA	NA	NA	NA	NA	NA	NA
PI 541137	CPYR_65.002	Pyrus communis	Beurré de Bollwiller	propagated 1842	NA	NA	CPYR_602.004	White Doyenne	Hedrick et al., 1921	NEW
PI 541729	CPYR_650.001	Pyrus hybrid	P. calleryana x P. fauriei	NA	NA	NA	NA	NA	NA	NA
PI 540949	CPYR_652.001	Pyrus betulifolia	P. betulifolia 3	NA	CPYR_1263.001	P. betulifolia OSU-3	CPYR_656.001	OPR-114 P. betulifolia No. 5	NCGR	NEW
PI 540943	CPYR_653.001	Pyrus betulifolia	OPR-110 P. betulifolia No. 1	NA	NA	NA	NA	NA	NCGR	NA
PI 540945	CPYR_655.001	Pyrus betulifolia	OPR-113 P. betulifolia No. 4	NA	NA	NA	NA	NA	NCGR	NA
PI 540946	CPYR_656.001	Pyrus betulifolia	OPR-114 P. betulifolia No. 5	NA	NA	NA	NA	NA	NCGR	NA
PI 541008	CPYR_659.001	Pyrus cordata	P. boissieriana (received as)	NA	NA	NA	NA	NA	NA	NA
PI 541013	CPYR_662.001	Pyrus calleryana	Capital (P. calleryana)	NA	NA	NA	NA	NA	NCGR	NA
PI 420995	CPYR_664.001	Pyrus calleryana	Whitehouse (P. calleryana)	NA	NA	NA	NA	NA	NCGR	NA
PI 214185	CPYR_665.001	Pyrus calleryana	P. calleryana D6	NA	NA	NA	NA	NA	NA	NA
PI 541025	CPYR_667.001	Pyrus calleryana	OPR-268 P. calleryana	NA	NA	NA	NA	NA	NCGR	NA
PI 541017	CPYR_671.001	Pyrus calleryana	P. calleryana No. 11	NA	NA	NA	NA	NA	NA	NA
PI 541018	CPYR_673.001	Pyrus calleryana	P. calleryana PC-5	NA	NA	NA	NA	NA	NA	NA
PI 617505	CPYR_674.001	Pyrus calleryana	P. calleryana PC-6	NA	NA	NA	NA	NA	NA	NA
PI 132091	CPYR_677.001	Pyrus fauriei	P. fauriei Arnold Arboretum	NA	NA	NA	NA	NA	NA	NA
PI 313928	CPYR_678.001	Pyrus calleryana f. graciliflora	P. calleryana v. graciliflora	NA	NA	NA	NA	NA	NA	NA
PI 263679	CPYR_68.002	Pyrus communis	Beurré de Jonghe	pre 1852	NA	NA	CPYR_249.001	Glou Morceau	Hedrick et al., 1921; Morgan, 2015	NEW
PI 313929	CPYR_680.001	Pyrus communis subsp. caucasica	P. communis ssp. caucasica - U.S.S.R.	NA	NA	NA	NA	NA	NA	NA
PI 541563	CPYR_681.001	Pyrus communis subsp. caucasica	P. communis ssp. caucasica No.6	NA	NA	NA	NA	NA	NA	NA
PI 541289	CPYR_682.001	Pyrus communis subsp. caucasica	P. communis ssp. caucasica Mag 4 - Pyatigorsk, Russia	NA	NA	NA	NA	NA	NA	NA
PI 322285	CPYR_684.001	Pyrus communis subsp. caucasica	P. communis ssp. caucasica - Ukraine	NA	NA	NA	NA	NA	NCGR	NA
PI 322286	CPYR_685.001	Pyrus communis subsp. caucasica	P. communis ssp. caucasica - Ukraine	NA	NA	NA	NA	NA	NA	NA
PI 541957	CPYR_686.002	Pyrus communis subsp. caucasica	P. communis ssp. caucasica F-25	NA	NA	NA	NA	NA	NA	NA
PI 541139	CPYR_69.002	Pyrus communis	Beurré de Nantes	reported 1845	NA	NA	CPYR_602.004	White Doyenne	Hedrick et al., 1921	NEW
PI 541290	CPYR_691.001	Pyrus communis subsp. caucasica	P. communis ssp. caucasica Mag 1 - Pyatigorsk, Russia	NA	NA	NA	NA	NA	NA	NA
PI 541560	CPYR_692.001	Pyrus communis subsp. caucasica	P. communis ssp. caucasica Mag 5 - Pyatigorsk, Russia	NA	NA	NA	NA	NA	NA	NA
PI 440631	CPYR_694.001	Pyrus communis subsp. caucasica	P. communis ssp. caucasica - Gofitskoye	NA	NA	NA	NA	NA	NA	NA
PI 440632	CPYR_697.001	Pyrus communis subsp. caucasica	P. communis ssp. caucasica - Gofitskoye	NA	NA	NA	NA	NA	NA	NA
PI 440631	CPYR_695.001	Pyrus communis subsp. caucasica	P. communis ssp. caucasica - Gofitskoye	NA	NA	NA	NA	NA	NA	NA
PI 440632	CPYR_698.001	Pyrus communis subsp. caucasica	P. communis ssp. caucasica - Gofitskoye	NA	NA	NA	NA	NA	NA	NA
PI 541140	CPYR_70.003	Pyrus communis	Beurré de Saint Nicolas	first fruited 1839	CPYR_602.004	White Doyenne	CPYR_593.002	Verte Longue d'Automne	Hedrick et al., 1921	NEW
PI 541318	CPYR_701.001	Pyrus communis	LA-62 (Virus Indicator)	NA	NA	NA	NA	NA	NCGR	NA
PI 541561	CPYR_702.001	Pyrus communis subsp. caucasica	P. communis ssp. caucasica Mag 2 - Pyatigorsk, Russia	NA	NA	NA	NA	NA	NA	NA
PI 392324	CPYR_704.002	Pyrus communis	Kustendil No. 510	NA	CPYR_249.001	Glou Morceau	CPYR_75.002	Beurré Easter	NCGR	NEW
PI 392325	CPYR_705.001	Pyrus communis	Kustendil No. 980	NA	CPYR_23.002	Arganche	CPYR_1631.001	Clapp Favorite	NCGR	NEW
PI 541439	CPYR_708.001	Pyrus communis	B-13 (Bartlett seedling - Virus Indicator)	NA	CPYR_38.001_07	Bartlett	CPYR_63.001	Anjou	NCGR	confirmed
PI 541369	CPYR_709.001	Pyrus communis	OHxF 51	1952	CPYR_431.001	Old Home	CPYR_38.001_07	Bartlett	Postman et al., 2013	confirmed
PI 541292	CPYR_710.001	Pyrus communis subsp. pyraster	P. communis ssp. pyraster Olez 1 - Turkey	NA	NA	NA	NA	NA	NA	NA
PI 324130	CPYR_711.001	Pyrus communis	IP-1100	NA	CPYR_59.002	Beurré Clairgeau	NA	NA	NCGR	NEW
PI 541323	CPYR_712.001	Pyrus communis subsp. pyraster	P. communis ssp. pyraster - Turkey	NA	NA	NA	NA	NA	NA	NA
PI 541294	CPYR_715.002	Pyrus communis	P-12 fire blight resistant rootstock	NA	NA	NA	NA	NA	NCGR	NA
PI 541295	CPYR_716.001	Pyrus communis subsp. pyraster	P-18 (Oregon 18) fire blight resistant rootstock	NA	NA	NA	NA	NA	NCGR	NA
PI 255607	CPYR_72.004	Pyrus communis	Beurré Dubuisson	1829	NA	NA	CPYR_75.002	Beurré Easter	Hedrick et al., 1921; Morgan, 2015	NEW
PI 541296	CPYR_722.002	Pyrus communis	P-70 fire blight resistant rootstock	NA	NA	NA	NA	NA	NCGR	NA
PI 541297	CPYR_723.002	Pyrus communis	P-79 fire blight resistant rootstock	NA	NA	NA	NA	NA	NCGR	NA
PI 541298	CPYR_724.001	Pyrus communis subsp. pyraster	P-87 fire blight resistant rootstock	NA	NA	NA	NA	NA	NCGR	NA
PI 541859	CPYR_725.002	Pyrus nivalis	P. nivalis P-91 (pure)	NA	NA	NA	NA	NA	NA	NA
PI 541370	CPYR_726.001	Pyrus communis	OHxF 97	1952	CPYR_431.001	Old Home	CPYR_38.001_07	Bartlett	Postman et al., 2013	confirmed
PI 440630	CPYR_727.001	Pyrus communis subsp. caucasica	P. communis ssp. caucasica - Yankulyski	NA	NA	NA	NA	NA	NA	NA
PI 440630	CPYR_730.001	Pyrus communis subsp. caucasica	P. communis ssp. caucasica - Yankulyski	NA	NA	NA	NA	NA	NA	NA
PI 440630	CPYR_729.001	Pyrus communis subsp. caucasica	P. communis ssp. caucasica - Yankulyski	NA	NA	NA	NA	NA	NA	NA
PI 440630	CPYR_728.001	Pyrus communis subsp. caucasica	P. communis ssp. caucasica - Yankulyski	NA	NA	NA	NA	NA	NA	NA
PI 541321	CPYR_731.001	Pyrus communis subsp. caucasica	P. communis ssp. caucasica - Yankulyski	NA	NA	NA	NA	NA	NA	NA
PI 541373	CPYR_734.001	Pyrus communis	OHxF 288	1952	CPYR_431.001	Old Home	CPYR_38.001_07	Bartlett	Postman et al., 2013	confirmed
PI 541374	CPYR_735.001	Pyrus communis	OHxF 361	1952	CPYR_431.001	Old Home	CPYR_38.001_07	Bartlett	Postman et al., 2013	confirmed
PI 313930	CPYR_736.001	Pyrus ×complexa	P. complexa [x complexa]	NA	NA	NA	NA	NA	NA	NA
PI 541142	CPYR_74.002	Pyrus communis	Beurré Dumont	first fruited 1833	CPYR_38.001_07	Bartlett	CPYR_63.001	Anjou	Hedrick et al., 1921; Morgan, 2015	NEW
PI 617506	CPYR_745.001	Pyrus cordata	P. cordata (pure) - France	NA	NA	NA	NA	NA	NA	NA
PI 541577	CPYR_747.001	Pyrus cordata	P. cordata (hybrid) - France	NA	NA	NA	CPYR_441.001	Passe Crassane	NCGR	NEW: Not sure about the direction of this duo
PI 541582	CPYR_752.001	Pyrus cordata	P. cordata - France	NA	NA	NA	NA	NA	NA	NA
PI 541579	CPYR_749.001	Pyrus cordata	P. cordata - France	NA	NA	NA	NA	NA	NA	NA
PI 483363	CPYR_75.002	Pyrus communis	Beurré Easter	pre 1823	CPYR_602.004	White Doyenne	NA	NA	Hedrick et al., 1921; Morgan, 2015	NEW
PI 316552	CPYR_753.001	Pyrus cossonii	P. cossonii - Netherlands	NA	NA	NA	NA	NA	NA	NA
PI 541733	CPYR_761.001	Pyrus hybrid	P. dimorphophylla x P. calleryana	NA	NA	NA	NA	NA	NA	NA
PI 541732	CPYR_760.001	Pyrus hybrid	P. dimorphophylla x P. calleryana	NA	NA	NA	NA	NA	NA	NA
PI 541731	CPYR_759.001	Pyrus hybrid	P. dimorphophylla x P. calleryana	NA	NA	NA	CPYR_1494.001	P. betulifolia 2 x P. call. 2	NCGR	NEW
PI 541143	CPYR_76.002	Pyrus communis	Beurré Fouqueray	first fruited 1880	CPYR_249.001	Glou Morceau	CPYR_17.001	Duchesse d'Angouleme	Hedrick et al., 1921; Morgan, 2015	NEW
PI 541735	CPYR_763.001	Pyrus hybrid	P. dimorphophylla x P. fauriei W-6	NA	NA	NA	CPYR_1494.001	P. betulifolia 2 x P. call. 2	NCGR	NEW
PI 541617	CPYR_765.001	Pyrus elaeagrifolia	P. elaeagrifolia MSU6768	NA	NA	NA	NA	NA	NA	NA
PI 541721	CPYR_767.001	Pyrus hybrid	P. elaeagrifolia Olez 3 (hybrid) - Turkey	NA	NA	NA	NA	NA	NA	NA
PI 541144	CPYR_77.002	Pyrus communis	Beurré Giffard	1825	CPYR_602.004	White Doyenne	NA	NA	Hedrick et al., 1921; Morgan, 2015	NEW
PI 541616	CPYR_771.001	Pyrus elaeagrifolia	P. elaeagrifolia WB-5 - Turkey	NA	NA	NA	NA	NA	NA	NA
PI 617507	CPYR_776.001	Pyrus fauriei	P. fauriei MSU5768	NA	NA	NA	NA	NA	NA	NA
PI 541634	CPYR_777.001	Pyrus fauriei	P. fauriei No. 5	NA	NA	NA	NA	NA	NA	NA
PI 541635	CPYR_778.001	Pyrus fauriei	P. fauriei OSU 69	NA	NA	NA	NA	NA	NA	NA
PI 541633	CPYR_779.001	Pyrus fauriei	P. fauriei No. 4	NA	NA	NA	NA	NA	NA	NA
PI 541637	CPYR_780.001	Pyrus fauriei	P. fauriei No. 4	NA	NA	NA	NA	NA	NA	NA
PI 541145	CPYR_78.002	Pyrus communis	Beurré Gris	NA	NA	NA	NA	NA	Hedrick et al., 1921; Morgan, 2015	NA
PI 541737	CPYR_781.007	Pyrus hybrid	P. betulifolia hybrid OP seedling	NA	NA	NA	NA	NA	NA	NA
PI 541738	CPYR_783.001	Pyrus hybrid	P. fauriei x P. betulifolia-1	NA	NA	NA	NA	NA	NA	NA
PI 541739	CPYR_784.001	Pyrus hybrid	P. fauriei x P. betulifolia-1	NA	NA	NA	NA	NA	NA	NA
PI 541146	CPYR_79.002	Pyrus communis	Beurré Gris d'Hiver Nouveau	1830	CPYR_78.002	Beurré Gris	CPYR_602.004	White Doyenne	Hedrick et al., 1921; Morgan, 2015	NEW: Beurré Gris (= Beurré Brown) origin confused, might be as early as 1628 or 1867, France; Beurré Gris d'Hiver Nouveau arose in France and first propagated 1830
PI 541664	CPYR_790.001	Pyrus gharbiana	P. gharbiana No. 4	NA	NA	NA	NA	NA	NA	NA
PI 541666	CPYR_794.001	Pyrus gharbiana	P. gharbiana	NA	NA	NA	NA	NA	NA	NA
PI 541671	CPYR_798.001	Pyrus hondoensis	P. hondoensis No. 1	NA	NA	NA	NA	NA	NA	NA
PI 541834	CPYR_825.001	Pyrus koehnei	P. koehnei	NA	NA	NA	NA	NA	NA	NA
PI 541828	CPYR_813.001	Pyrus koehnei	P. koehnei	NA	NA	NA	NA	NA	NA	NA
PI 541825	CPYR_808.001	Pyrus koehnei	P. koehnei	NA	NA	NA	NA	NA	NA	NA
PI 541829	CPYR_815.001	Pyrus koehnei	P. koehnei	NA	NA	NA	NA	NA	NA	NA
PI 541826	CPYR_809.001	Pyrus koehnei	P. koehnei	NA	NA	NA	NA	NA	NA	NA
PI 541827	CPYR_812.001	Pyrus koehnei	P. koehnei	NA	NA	NA	NA	NA	NA	NA
PI 541834	CPYR_820.001	Pyrus koehnei	P. koehnei hybrid	NA	NA	NA	NA	NA	NA	NA
PI 307539	CPYR_83.002	Pyrus communis	Beurré Inflancka	NA	NA	NA	NA	NA	NCGR	NA
PI 541592	CPYR_830.001	Pyrus cossonii	P. cossonii - Russia	NA	NA	NA	NA	NA	NA	NA
PI 541851	CPYR_846.001	Pyrus mamorensis	P. mamorensis - Morocco	NA	NA	NA	NA	NA	NA	NA
PI 541848	CPYR_842.001	Pyrus mamorensis	P. mamorensis - Morocco	NA	NA	NA	NA	NA	NA	NA
PI 541849	CPYR_844.001	Pyrus mamorensis	P. mamorensis - Morocco	NA	NA	NA	NA	NA	NA	NA
PI 541843	CPYR_834.001	Pyrus mamorensis	P. mamorensis - Morocco	NA	NA	NA	NA	NA	NA	NA
PI 541846	CPYR_837.001	Pyrus mamorensis	P. mamorensis - Morocco	NA	NA	NA	NA	NA	NA	NA
PI 280030	CPYR_84.003	Pyrus communis	Beurré Jean van Geert	NA	NA	NA	NA	NA	Hedrick et al., 1921; Morgan, 2015	NA
PI 541148	CPYR_86.002	Pyrus communis	Beurré Millet	NA	NA	NA	NA	NA	Hedrick et al., 1921	NA
PI 541860	CPYR_862.001	Pyrus nivalis	P. nivalis No. 2	NA	NA	NA	NA	NA	NA	NA
PI 541745	CPYR_866.001	Pyrus nivalis	P. nivalis (hybrid) - Yugoslavia - compact habit	NA	CPYR_38.001_07	Bartlett	NA	NA	NCGR	NEW
PI 215325	CPYR_87.003	Pyrus communis	Beurré de Mortillet	pre 1895	CPYR_38.001_07	Bartlett	CPYR_59.002	Beurré Clairgeau	Hedrick et al., 1921; Morgan, 2015	NEW: Believed seedling of a Bon Chretien d'Ete, here not confirmed
PI 541896	CPYR_875.001	Pyrus pseudopashia	P. pseudopashia [P. pashia Kansu?]	NA	NA	NA	NA	NA	NA	NA
PI 541567	CPYR_881.001	Pyrus communis subsp. pyraster	P. communis ssp. pyraster No. 9	NA	NA	NA	NA	NA	NA	NA
PI 377611	CPYR_883.001	Pyrus communis subsp. pyraster	P. communis ssp. pyraster - Macedonia	NA	NA	NA	NA	NA	NA	NA
PI 349026	CPYR_989.001	Pyrus communis subsp. pyraster	P. communis ssp. pyraster - Macedonia	NA	NA	NA	NA	NA	NA	NA
PI 349027	CPYR_991.002	Pyrus communis subsp. pyraster	P. communis ssp. pyraster - Macedonia	NA	NA	NA	NA	NA	NA	NA
PI 349028	CPYR_993.001	Pyrus communis subsp. pyraster	P. communis ssp. pyraster - Macedonia	NA	NA	NA	NA	NA	NA	NA
PI 369881	CPYR_986.001	Pyrus communis subsp. pyraster	P. communis ssp. pyraster - Macedonia	NA	NA	NA	NA	NA	NA	NA
PI 377614	CPYR_984.004	Pyrus communis subsp. pyraster	P. communis ssp. pyraster - Macedonia	NA	NA	NA	NA	NA	NA	NA
PI 377614	CPYR_984.002	Pyrus communis subsp. pyraster	P. communis ssp. pyraster - Macedonia	NA	NA	NA	NA	NA	NA	NA
PI 235575	CPYR_884.002	Pyrus pyrifolia	P. pyrifolia No. 579	NA	NA	NA	NA	NA	NA	NA
PI 420808	CPYR_885.001	Pyrus pyrifolia	P. pyrifolia - Thailand	NA	NA	NA	NA	NA	NA	NA
PI 358953	CPYR_886.001	Pyrus pyrifolia	HN-36 P. pyrifolia (Virus Indicator)	NA	CPYR_413.001	Nijisseiki	CPYR_528.001	Shinseiki	NCGR	NEW: Known seedling of Nijisseiki; second parent inferred as Shinseiki
PI 358954	CPYR_887.001	Pyrus pyrifolia	HN-39 P. pyrifolia (Virus Indicator)	NA	NA	NA	CPYR_554.001	Suisei	NCGR	NEW: Nijisseiki believed parent of HN-39, here not confirmed
PI 541944	CPYR_889.001	Pyrus regelii	P. regelii No. 3 (hybrid)	NA	NA	NA	NA	NA	NA	NA
PI 541945	CPYR_890.001	Pyrus regelii	P. regelii	NA	NA	NA	NA	NA	NA	NA
PI 541948	CPYR_891.001	Pyrus salicifolia	P. salicifolia No. 1	NA	NA	NA	NA	NA	NA	NA
PI 541951	CPYR_893.001	Pyrus salicifolia	Pendula	NA	NA	NA	NA	NA	NCGR	NA
PI 541746	CPYR_898.001	Pyrus hybrid	P. serrulata x P. heterophylla	NA	NA	NA	NA	NA	NA	NA
PI 541149	CPYR_90.002	Pyrus communis	Beurré Phillippe Delfosse	1832	CPYR_17.001	Duchesse d'Angouleme	CPYR_86.002	Beurré Millet	Hedrick et al., 1921	NEW
PI 322710	CPYR_902.001	Pyrus communis	P. communis - Ukraine	NA	NA	NA	NA	NA	NA	NA
PI 322711	CPYR_903.001	Pyrus communis	B-37 (P. communis) - Ukraine	NA	CPYR_38.001_07	Bartlett	CPYR_63.001	Anjou	NCGR	NEW
PI 312154	CPYR_904.002	Pyrus hybrid	P. elaeagrifolia (hybrid) - Hungary	NA	NA	NA	NA	NA	NA	NA
PI 541914	CPYR_905.001	Pyrus pyrifolia	P. pyrifolia hybrid - Afghanistan	NA	NA	NA	NA	NA	NA	NA
PI 541974	CPYR_907.001	Pyrus syriaca	P. syriaca - Israel	NA	NA	NA	NA	NA	NA	NA
PI 541976	CPYR_913.001	Pyrus syriaca	P. syriaca - Israel	NA	NA	NA	NA	NA	NA	NA
PI 541975	CPYR_908.001	Pyrus syriaca	P. syriaca No. 1 - Israel	NA	NA	NA	NA	NA	NA	NA
PI 541975	CPYR_909.001	Pyrus syriaca	P. syriaca No. 1 - Israel	NA	NA	NA	NA	NA	NA	NA
PI 307540	CPYR_91.003	Pyrus communis	Beurré Slucka	NA	NA	NA	NA	NA	NCGR	NA
PI 541976	CPYR_912.001	Pyrus syriaca	P. syriaca Mayron B - Israel	NA	NA	NA	NA	NA	NA	NA
PI 541977	CPYR_916.001	Pyrus syriaca	P. syriaca No. 2 - Israel	NA	NA	NA	NA	NA	NA	NA
PI 541977	CPYR_914.001	Pyrus syriaca	P. syriaca No. 2 - Israel	NA	NA	NA	NA	NA	NA	NA
PI 541977	CPYR_915.001	Pyrus syriaca	P. syriaca No. 2 - Israel	NA	NA	NA	NA	NA	NA	NA
PI 312149	CPYR_920.001	Pyrus syriaca	P. syriaca - Armenia	NA	NA	NA	NA	NA	NA	NA
PI 617511	CPYR_922.001	Pyrus hybrid	P. hybrid	NA	NA	NA	NA	NA	NCGR	NA
PI 542009	CPYR_924.001	Pyrus ussuriensis	P. ussuriensis - China	NA	NA	NA	NA	NA	NA	NA
PI 318874	CPYR_925.001	Pyrus hondoensis	P. hondoensis - Aonashi	received in Maryland in 1967 from Japan	NA	NA	CPYR_269.003	Hau Kai	NCGR	NEW
PI 312150	CPYR_927.001	Pyrus ussuriensis	P. ussuriensis - Alma-ata	NA	NA	NA	NA	NA	NA	NA
PI 312151	CPYR_928.001	Pyrus ussuriensis	P. ussuriensis - Tashkent	NA	NA	NA	NA	NA	NA	NA
PI 312152	CPYR_929.001	Pyrus ussuriensis	P. ussuriensis - Tajikistan	NA	NA	NA	NA	NA	NA	NA
PI 313938	CPYR_931.001	Pyrus ussuriensis	P. ussuriensis (hybrid?)	NA	NA	NA	NA	NA	NA	NA
PI 313939	CPYR_932.001	Pyrus ×uyematsuana	P. x uyematsuana	NA	NA	NA	NA	NA	NA	NA
PI 325928	CPYR_940.001	Pyrus dimorphophylla	P. dimorphophylla Vo 27 - Japan	NA	NA	NA	NA	NA	NA	NA
PI 325929	CPYR_941.001	Pyrus dimorphophylla	P. dimorphophylla Vo 28 - Japan	seed collected pre 1968	NA	NA	CPYR_1390.001	P. dimorphophylla - Japan	NCGR	NEW
PI 325932	CPYR_943.001	Pyrus dimorphophylla	P. dimorphophylla Vo 32 - Japan	NA	NA	NA	NA	NA	NA	NA
PI 541151	CPYR_95.001	Pyrus communis	Blakeney Red	NA	NA	NA	NA	NA	NCGR	NA
PI 541152	CPYR_97.004	Pyrus communis	Bon Chretien Bonnamour	1895	CPYR_602.004	White Doyenne	CPYR_249.001	Glou Morceau	Hedrick et al., 1921	NEW
PI 541866	CPYR_970.001	Pyrus nivalis	P. nivalis - United Kingdom	NA	NA	NA	NA	NA	NA	NA
PI 541866	CPYR_970.002	Pyrus nivalis	P. nivalis - United Kingdom	NA	CPYR_1165.001	Bosc - OP-5	NA	NA	NCGR	NEW
PI 255609	CPYR_98.003	Pyrus communis	Bon Chretien d'Hiver	NA	NA	NA	NA	NA	Hedrick et al., 1921; Morgan, 2015	NA
PI 349026	CPYR_989.006	Pyrus communis subsp. pyraster	P. communis ssp. pyraster (foliage mutant) - Macedonia	NA	NA	NA	NA	NA	NA	NA
-	DH(DoubleHaploid)	Pyrus communis	DH sequenced	NA	NA	NA	NA	NA	NA	NA
-	Illinois76	Pyrus ussuriensis x pyrifolia	Illinois 76	NA	NA	NA	NA	NA	AFRS	NA
-	Moonglow	Pyrus communis	Moonglow	introduced 1962	US-Michigan437	US-Michigan 437	CPYR_489.002	Roi Charles de Wurttemberg	Morgan, 2015	confirmed
-	NJ487601193	Pyrus communis	NJ487601193	NA	NA	NA	CPYR_439.001	Pai Li (Beijing White Pear)	AFRS	NEW: beleived to be Bartlett x Illinois 76, here not confirmed
-	NJA2R59T69	Pyrus hybrid	NJA2R59T69	NA	NA	NA	NA	NA	AFRS	NA
-	NJB9R1T117	Pyrus communis x Pyrus ussuriensis	NJB9R1T117	NA	CPYR_63.001	Anjou	NA	NA	AFRS	NEW
-	p01	Pyrus communis	PÉR_MAŽUCH	NA	CPYR_2131.001	Bergamotte de Baillargues	NA	NA	FEM	NEW
-	P0176	Pyrus communis	Bergamotte de Hollande	NA	NA	NA	NA	NA	Hedrick et al., 1921	NA
-	p02	Pyrus communis	PÉR_TEMPORIVO	NA	NA	NA	NA	NA	FEM	NA
-	p04	Pyrus communis	PÉR_ŽUCHERIN	NA	NA	NA	NA	NA	FEM	NA
-	p05	Pyrus communis	PÉR_STUER	NA	CPYR_57.001	Besi de La Motte	NA	NA	FEM	NEW
-	p06	Pyrus communis	PÉR_DE_LA_REGINA	NA	NA	NA	CPYR_2449.001	Colmar d'Ete	FEM	NEW
-	p08	Pyrus communis	PÉR_MOSCATO	NA	NA	NA	NA	NA	FEM	NA
-	P2661	Pyrus communis	Angélys	first commercial plantings 1990-2000	CPYR_75.002	Beurré Easter	CPYR_148.001	Doyenne du Comice	Morgan, 2015	confirmed
-	P2751	Pyrus hybrid	NY 10352	after 1920	NA	NA	CPYR_2724.001	Comtesse de Paris	Pasqualini et al., 2006	confirmed Flemish Beauty (= Comtesse de Paris) parentage: NY 10257 (﻿Illinois 65 x Bartlett or Seckel) x Flemish Beauty. NY 10257 and Illinois 65 were not analysed in this study. No relationship with Seckel, but related to Bartlett
-	P2795	Pyrus hybrid	Euras	NA	NA	NA	CPYR_75.002	Beurré Easter	INRA	confirmed parentage of Beurré Easter (= Doyenne d'Hiver)
-	P3480	Pyrus hybrid	PCR13A5 (hybride INRA (Pierre corneille x Wilder))	NA	CPYR_2129.002	Pierre Corneille	CPYR_364.002	Lucy Duke	INRA	confirmed (Lucy Duke = Wilder)
-	US76128-009	Pyrus communis	US76128-009	NA	CPYR_1168.001	El Dorado	NA	NA	AFRS	NEW
-	US82720-002	Pyrus communis	US82720-002	NA	NA	NA	NA	NA	NA	NA
-	US-Michigan437	Pyrus communis	US-Michigan 437	NA	CPYR_592.001	Vermont Beauty	CPYR_38.001_07	Bartlett	NCGR	confirmed: Vermont Beauty = Barseck
* AFRS = USDA-ARS Appalachian Fruit Research Laboratory; FEM = Fondazione Edmund Mach; INRA = Institute National de la Research Agronomique, Angers; NCGR = USDA-ARS National Clonal Germplasm Repository, Corvallis
